# Supplementary material for: The significance of information variables in polydrug use by adolescents: insights from a cross-sectional study in Tarragona (Spain)
Source: PeerJ journal article supplement (doi:10.7717/peerj.16801), 2024-01-19
Supplement: Questions_in_English.pdf [file Questions_in_English.pdf]

## Questions in English

---

### **Input questions**

---

Q1: What is your sex?

---

Q2: What is your age?

---

Q3: Non adherence to norms

---

NORMS.1: Most rules can be broken if they are not convenient.

NORMS.2: I follow the rules that I want to follow.

NORMS.3: It is hard to trust anything because everything changes.

NORMS.4: In fact, no one knows what is expected of him/her in life.

NORMS.5: You can never be sure of anything in life.

NORMS.6: Sometimes, it is necessary to break the rules to succeed.

NORMS.7: Following the rules does not guarantee success.

---

### Q4: AGRESSIVE

---

AGRESSIVE.1: I have been easily bothered or irritated

AGRESSIVE.2: I have had outbursts of anger that I could not control.

AGRESSIVE.3: I have wanted to break or damage things.

AGRESSIVE.4: I have had a fight with someone.

AGRESSIVE.5: I yelled at someone or threw things at them

---

### Q5: School support

---

SCHOOLENG.1: The adults at my school care about me.

SCHOOLENG.2: I have friends at my educational center who care about me.

SCHOOLENG.3: The students at my educational center are kind to each other.

SCHOOLENG.4: My educational center is helping me achieve goals that matter to me.

SCHOOLENG.5: I enjoy participating in activities at my educational center.

---

### Q6: Parental support

---

PARSUPP.1: I receive care and affection from my parents.

PARSUPP.2: With my parents, I can talk about personal matters.

PARSUPP.3: I receive advice from my parents regarding my studies.

PARSUPP.4: I receive advice from my parents regarding other topics (your projects).

PARSUPP.5: I also receive help from my parents with other things.

---

### Q7: Parental control

---

PARCONT.1: My parents consider it important that my studies go well.

PARCONT.2: They establish clear rules about what I can do at home.

PARCONT.3: hey establish clear rules about what I can do outside the house.

PARCONT.4: They establish clear rules about when I have to be home in the evening.

PARCONT.5: They know who I am with at night.

PARCONT.6: They know where I am at night.

PARCONT.7: They know my friends.

PARCONT.8: They know the parents of my friends.

---

### Q8: Peer Influence

---

PEERINFL.1: Sometimes you have to smoke cigarettes to avoid being left out of the peer group.

PEERINFL.2: Sometimes it is necessary to drink alcohol to avoid being left out of the peer group.

PEERINFL.3: Sometimes it is necessary to smoke cannabis to avoid being left out of the peer group.

PEERINFL.4: Sometimes it is necessary to skip classes to avoid being left out of the peer group.

---

### Q9: INF\_LEVEL

---

---

My information about

---

---

substance use come from:

---

Q10: School

Q11: Parents/legal guardians

Q12: Mass media

Q13: Internet

Q14: Siblings

Q15: Peers and friends

---

Number of sources

---

Monitored sources (Q10+Q11+Q12)

No monitored sources (Q13+Q14+Q15)

---

Prevalence last 30 days

---

Use 1: Did you used alcohol drinks last 30 days?

Use2: Did you used cigarettes last 30 days?

Use 3: Dis you used cannabis last 30 days?

---
