# Supplementary material for: The significance of information variables in polydrug use by adolescents: insights from a cross-sectional study in Tarragona (Spain)
Source: PeerJ. 2024 Jan 19;12:e16801. doi: 10.7717/peerj.16801 (PMC10802159; doi:10.7717/peerj.16801)
Supplement: Supplemental Information 1 [file peerj-12-16801-s001.xlsx]

## Sheet: Sheet1
I live with	I was born	My father was born	My mother was born	SEX (Q0)	AGE (Q2)	(Q3)NORMS1	(Q3)NORMS2	(Q3)NORMS3	(Q3)NORMS4	(Q3)NORMS5	(Q3)NORMS6	(Q3)NORMS7	(Q4)AGRESSIVE1	(Q4)AGRESSIVE2	(Q4)AGRESSIVE3	(Q4)AGRESSIVE4	(Q4)AGRESSIVE5	(Q5)SCHOOLENG1	(Q5)SCHOOLENG2	(Q5)SCHOOLENG3	(Q5)SCHOOLENG4	(Q5)SCHOOLENG5	(Q6)PARENTALSUPP1	(Q6)PARENTALSUPP2	(Q6)PARENTALSUPP3	(Q6)PARENTALSUPP4	(Q6)PARENTALSUPP5	(Q7)PARENTCONT1	(Q7)PARENTCONT2	(Q7)PARENTCONT3	(Q7)PARENTCONT4	(Q7)PARENTCONT5	(Q7)PARENTCONT6	(Q7)PARENTCONT7	(Q7)PARENTCONT8	(Q8)PEERINFL1	(Q8)PEERINFL2	(Q8)PEERINFL3	(Q8)PEERINFL4	(Q9)INF_LEVEL	Q10: School	Q11_PARENTS	Q12_MASS_MEDIA	(Q13)INTERNET	(Q14)SIBLINGS	(Q15)PEERS	Use1_ALCOHOL30	Use2_CIGARRILLOS30	Use3_CANNABIS30
5	1	2	1	1	18	1	3	4	3	5	3	3	5	4	4	3	1	4		2		1	4		4	4	4	3	4	3	4		4	4	4	1	1	1	1	4	1	1	0	1	0	0	0	0	0
8	2	2	1	0	15	3	4	4	4	5	4	4	4	2	3	4	4	3	3	3	3	3	3	1	2	1	3	4	3	3	4	3	3	2	1	2	2	2	2	3	0	1	0	1	0	1	0	0	0
3	2	2	2	1	16	4	5	5	5	5	5	3		1	1	2	2		1	4	5	1	2	4		4	4	3		3	3	3	3	3		1	1	1		3	0	0	0	0	0	0	0	0	0
3	1	2	2	1	15	3	5	3	2	5	4	1	2	1	1	2	1	3	5	5	4	5	4	4	4	4	4	4	3	3	3	4	4	3	3	1	1	1	1	5	0	1	1	1	1	1	0	0	0
3	2	2	2	1	15	2	1	4	5	5	5	3	4	2	2	1	1	4	5	3	3	2		1	3	4		4	4	4	4	4	4	4	1	1	1	1	1	5	1	1	1	1	0	1	0	0	0
5	2	2	2	1	15	5	1	5	5	5	5	5	5	5	1	1	5	1	5	4	1	3	4	3	4	4	4	3	4	4	3	4	4	4	1	1	1	1	5	5	0	1	0	0	0	0		0	0
3	1	2	2	1	15	1	1	5	5	5	1		2	1	1	1	1	5	4		5	4	4	3	4	4	4	4	4	4	4	4	4	4		1	1	1	1								0	0	0
4	1	1	1	0	15	2	1	4	5	3	2	3	2	1	1	1	2	4	4	3	4	2	4	3	3	3	4	3	4	4	3			4		1	1	1	1	5	0	1	1	1	0		0	0	0
4	1	1	1	0	16	1	3	1	5	5	3	4	4	5	1	2	1	4	4	3	3	3	4	3	4	4	3	3	4	3	3	2	4	3	2	1	1	1	1	5	1	1	1	1	1	0	1	0	0
3	1	1	1	0	15	3	4		4	4	2	3	4	5	3	2	4	1	4	1	1	1	3	4	2	4	3	1	3	2	3	4	1	3	2	2	3	1	1	4	0	1	0	0	1	1	0	2	0
3	1	1	1	1	15								1	2	1	1	1	5	5	3	4	3	4	3	3	4	4	2	1	1	1	1	1	1	1	1	1	1	1		0	0	0	0	0	0	0	0	0
3	1	1	1	1	15	2	2	3	3	3	2	2	3	2	1	1	1	3	4	2	1	2	4	4	2	3	4	4	4	4	4			3	3	1	1	1	1	5	1	1	0	0	0	1	0	0	0
3	2	2	2	0	15	3	3	5	5	5	3	3	2	1	1	1	1	5	5	4	4	4	4	3	4	4	4	3	3	3	3	4	4	4	3	1	1	1	1	5				0			0	0	0
3	1	1	1	1	15	5	5	5	5	1	5	5	2	5	4	1	5	2	5	4	1	3	4	3	3	4	3	3	1	1	1	4	3	4	3	1	1	1	1	4	0	0	0	1	0	0	1	0	0
1	1	2	2	1	15	3	3	4	2	5	4	3	4	3	5	3	4	2	3	3	3	2	4	2	4	4	3	4	3	3	4	3	3	2	2	1	1	1	1	4	1	1	1	1	1	1	0	0	0
3	2	2	2	0	15	1	1	3	3	1	3	3	1	1	1	1	1	3	3	3	3	3	1	2	3	3	3	3	2	3	2	3	2	3	3	4	4	3	3		0	1	0	0	1	1	0	0	0
3	2	2	2	1	16	1	2	2	3	2	2	3	1	2	1	1	1	3	4	2	3	4	3	1	3	3	3	3	3	4	4	4	4	3	2	1	1	1	1
5	1	2	2	1	18								2	2	2	1	2	5	5	1	5	4	4	3	4	4	4	4	4	4	4	4	4	4	4	1	1	1	1	5	1	1	1	1	0	0	0	0	0
3	1	1	1	1	#NULL!	2	3	3	5	5	4	3	3	2	4	2	1	4	3	4	5	4	4	1	4	3	4	4	3	3	2	4	3	3	3	1				5	1	1	1	1	1	1	0	0	0
5	1	1	1	0	15	4	3	4	3	5	4	4	4	2	2	1	2	2	4	2	1	3	4	2	4	4	2	4	3	4	3	4	4	4	3	1	1	1	1	3	1	1	0	0	0	0	0	0	0
3	1	1	1	1	15	3	4	3	3	4	3	5	4	2	3	2	3	3	5	3	3	3	4	2	3	2	3	4	3	3	2	4	4	2	2	1	1	1	1	4	1	1	0	0	0	0	0	0	0
3	1	1	1	1	15	1	1	2	3	2	2	3	1	1	1	1	1	3	4	3	3	5	4	3	4	3	4	4	3	4	3	4	4	2	1	1	1	1	1	5	1	1	1	1	1	1	0	0	0
4	1	1	1	0	15	2	4	4	5	4	1	3	3	3	1	2	1	4	4	4	3	3	4	3	3	3	4	4	3	3	2	3	4	4	4												0	0	0
5	1	1	1	0	15	5	5	5	5	5	5	5	5	5	5	5	5	3	5	1	1	1	3	1	4	4	4	3	3	3	3	2	1	4	4	1	1	1	2	5	0	1	1	1	0	1	0	0	0
10	1	2	2	1	15	3	5	5	5	5	3		1	1	1	1	1				4	5				3	3	4	4	4	4	4	4	4	4	3	3	3	3								0	0	0
6	1	1	1	1	15	1	1	5	5	5	4	1	3	1	3	1	1	3	2	1	5	3	4	3	4	4	4	4	4	4	4	4	4	4	2	1	1	1	1	5	1	1	1	1	0	0	0	0	0
3	1	1	1	1	15	1	3	3	4	5	2	5	2	2	3	4	3	2	4	3		3	4	4	4	3	4	2	3	3	3	2	4	4	2	1	1	1	1	5	0	1	1	0	0	0	2	0	0
3	1	1	1	1	15	1	1	3	4	4	1	1	4	3	1	2	3	4	5	5	3	4	4	4	4	4	4	4	4	4	4	4	4	4	4	1	1	1	1	5		1	1				0	0	0
3	2	2	2	0	15	5	5	4	4	5	5	3	4	4	2	4	4	2	5	4	4	4	4	3	3	4	4	3	3	3	2	1	1	4	4	1	1	1	1	5	0	1	1	1	1	1	0	0	0
4	1	1	1	0	15	4	4	4	4	4	1	1	4	1	1	1	1	2	3	1	4	3	4	2	4	2	3	4	4	3	4	4	4	3	1	1	1	1	1	4	0	1	1	1	1	0	0	0	0
5	1	1	1	1	15	3	3	3	5	5	4	5	4	3	4	2	3	3	4	3	3	3	4	3	3	3	3	3	2	2	3	3	4	3	2	2	1	2	1	5	0	0	1	1	0	1	0	0	0
3	1	1	1	1	15	1	1	3	3	3	3	3	3	3	3	3	3	3	3	2	2	2	4	3	4	4	4	4	1	3	2	4	4	4	1	5	5	5	5	3	0	1	1	1	1	1	0	0	0
3	1	1	1	1	15	3	4	5	5	4	3	5	5	4	5	3	4	3	4	3	2	4	2	1	3	3	2	4	3	3	4	3	4	4	3	1	1	1	2	3	1		0	1	0	1	0	0	0
3	1	1	1	0	15	3	4	3	3	4	1	2	4	2	1	3	5	2	5	3	3	5	4	2	4	4	3	4	4	4	4	4	4	4	3	1	1	1	1	4	1	1	1	1	0	1	0	0	0
3	1	1	1	1	15	2	3	5	5	5	5	4		2	2	3	2	3	4	3		4	4	4	4	4	4	4	4	4	4	4	4	3	3	1	1	1	3	5	1	1	1	1	0	1	1	0	0
3	2	2	2	0	15	4	1	5	5	5	3	5	1	3	1	2	1	4	5	3	4	2						4	3	3	3	4		4	4	1	1	1	1		0	1	0	0	1	1	0	0	0
3	1	1	2	0	15	1	3	1	1	1	1	3	1	1	1	1	1	5	5	3	5	5	4	4	4	4	4	4	4	4	4	4	4	4	4	1	1	1	1	5	1	1			1		0	0	0
3	1	2	1	1	15	2	2	4	4	5	5	5	5	5	4	4	4	4	4	3	4	3	4	3	4	4	4	4	3	3	4	4	4	4	3	1	1	1	1	4	0	1	1	1	1	1	0	0	0
3	1	1	1	1	15	5	2	5	5	5	5	5	1	5	5	5	5	5	5	5	5	5			4	4	4	4			3	4	3	4	3				5	5	1	0	1	1	0	1	1	0	0
3	1	2	1	0	15	3	5	5	5	5	5	5	5	2	3	3	3	4	3	3	5	3	3	2	3	2	3	3	4	4	4	4	4	4	4	1	1	1	1		1	0	0	1	0	0	0	0	0
3	1	2	2	0	16	2	3	5	5	5	3	2	5	5	5	5	4	1	5	5	2	3	4	1	4	4	4	4	1	3	2	4	4	3	2	1	1	1	1	5	1	1	0	1	1	0	0	0	0
3	1	2	2	1	15	3	5	5	4	5	1	3	4	1	1	2	1	5	5	1	5	4	2	1	4	4	4	4	4	3	2	3	4	4	2	1	1	1	1	5	0	0	0	0	0	0	0	0	0
3	1	1	1	0	15	1	4	4	4	4	2	2	3	2	1	1	1	3	1	3	2	3	4	3	4	3	4	3	3	4	3	4	4	4	4	1	1	1	1	5	1	1	0	0	1	1	0	0	0
3	1	1	1	0	15	2	3	5	4	5	4	3	3	1	1	2	2	3	4	3	3	3	4	3	4	3	3	4	4	3	4	4	4	4	3	1	1	1	1	5	1	1	0	0	0	0	0	0	0
3	2	2	2	1	16	2	3	5	3	4	3	3	2	3	2	2	2	3	4	3	3	3	4	2	4	4	3	4	3	3	3		3	1	1	1	1	1	1	4	0	0	1	1	0	0	0	0	0
3	1	2	2	1	15	1	1	1	1	1	1	2	2	1	1	1	1	5	5	5	5	5	4	4	4	4	4	4	4	4	4	4	4	4	4	1	1	1	1	5	1	1	1	1	0	1	0	0	0
8	1	1	1	0	16	5	5	5	5	5	5	5	5	5	3	2	5	1	4	1	1	2	4	4	4	4	4	4	4	4	4	4	4	4	3	1	1	1	1	4	0	1	0	1	1	1	1	3	0
3	1	1	1	1	15	2	2	2	3	1	4	3	2	1	1	1	1	2	4	2	1	1	4	4	4	4	4	4	4	4	3	4	4	4	3	1	4	1	3	5	1	1	1	0	1	0	0	0	0
3	1	1	1	0	15	2	2	4	2	4	5	4	5	2	3	4	1	4	3	2	4	5	2	1	3	2	1	4	4	3	4	4	4	4	3	1	1	1	1	4	0	1	1	1	0	1	1	0	0
3	1	1	1	0	16	4	5	5	5	4	2	4	3	4	5	5	5	3	4	2	5	4	4	2	4	4	2	3	4	3	2	3	4	4	3	1	1	1	1	4	0	0	1	1	1	1	2	3	3
5	1	1	1	0	17	2	4	4	5	5	3	4	4	4	5	2	5	4	4	1	4	3	2	1	1	1	2	3	1	1	2	4	4	3	1	1	1	1	1	5	0	1	1	0	0	0	0	0	0
3	1	2	2	1	15	5	3	3	4	4	3	2	2	2	3	2	1	3	4	3	3	3	4	3	4	3	4	4	4	4	3	4	4	4	4	1	1	1	1	4	1	0	1	1	0	0	0	0	0
3	1	1	1	1	15	1	3	4	3	5	2	4	2	1	1	1	1	4	4	3	4	4	4	3	4	4	4	3	2	3	3	4	4	4	4	1	1	1	1	4	0	1	1	1	1	1	0	0	0
3	1	1	1	1	15	3	5	3	5	4	5	5	1	2	1	1	1	4	4	4	3	3	4	4	4	3	4	4	4	4	4	4	4	4	3	1	1	1	1	4	1	1	1	0	0	0	0	0	0
1	1	1	1	1	#NULL!	1	1	1	3	3	3	3	3	4	1	3	5	3	5	2	3	1	3	2	4	4	2	2	4	4	4	3	3	3	1	1	1	1	1	5	1	1	0	0	1	1		0	0
3	1	1	1	1	15	2	5	4	4	3	4	4	2	2	1	1	1	2	2	4	3	4	4	4	4	4	4	3	4	2	3	2	1	2	3	1	1	1	1	4		0	1	1	0	0	0	0	0
3	1	2	1	1	15	2	2	3	3	4	4	4	3	1	1	1	2	3	4	3	3	3	4	3	4	4	3	3	3	3	3	4	3	3	2	1	1	1	1	5	1	1	1	0	0	0	1	0	0
8	1	2	1	1	15	5	5	4	4	5	5	2	3	3	3	3	3	3	5	4	3	2	4	4	4	4	4	3	3	3	3	3	3	2	3	1	1	1	1	5	1	1	1	1	1	1	0	0	0
3	1	1	1	0	15	3	3	3	5	5	5	4	5	5	5	5	5	1	5	1	1	1	3	1	4	3	1	4	2	1	3	4	2	4	4	1	1	1	1	5	1	1	1	1	1	1	3	0	0
5	2	2	2	0	15	3	4	3	3	3	3	3	2	2	2	2	2		3															3	1	3	3	3	3	5	0	0	0	1	0	0	0	0	0
4	1	1	1	1	15	2					3	3	3	3	3	1	2	3	4	3	3	3	4	4	4	4	4	3	3	3	3	3	3	3	3	1	1	1	1	4	1	1	1	1	0	0	2	0	0
3	1	1	1	1	15	4	1	3	2	5	5	5	2	1	1	1	1	5	5	3	5	4	4	3	2	4	3	4	3	3	3	4	4	4	4	1	1	1	1	5	1	0	0	0	0	0	0	0	0
3	1	1	1	0	15	1	1	5	3	4	3	3	5	5	5	1	1	5	5	1	5	4	4	4	4	4	4	4	4	4	4	4	4	4	4	1	1	1	1	5	1	1	1	1	0	0	1	0	0
5	2	2	2	0	15		3		2	2	1		5	1	1	1	1	4	4	4	3	3	3	3	3	3	3	4	4	3	4	4	4	2	1	1	1	1	1	5	0	1		1	1	0	0	0	0
3	1	2	2	0	16		5	5	1	1	1	5							4	4	4	4	4	4	3	3	3	4	4	4	4					1	1	1	1		0	0	0	0	0	0	0	0	0
3	1	2	2	1	15	5	4	5	5	4	5	5	4	3	1	2	3	2	4	3	2	1	4	2	4	4	4	4	4	4	4			4	1	1	1	1	1	5	1	1	0	0	0	0	0	0	0
5	1	1	1	1	15								5					4		2	1	2	4	4	4	4	4	4								1	1	1	1	5	1	1	1	1	0	0	0	0	0
3	1	1	1	0	15	2	5	5	5	5	2	1	5	5	3	2	3	3	5	4	3	3	4	2	4	4	4	4	4	4	4	4	4	4	3	1	1	1	1	4	0	1	1	1	0	1	0	0	0
5	1	2	2	0	15	4	5	5	3	5	5	5	5	5	5	2	2	4	4	1	2	3	2	1	1	1	3	4	4	4	4	4	4	3	2	2	2	1	2	5	1	1	1	1	0	1	0	0	0
3	2	2	2	0	16	1				1	1	1	3	1	1	1	1	5	5	5		5	4	4	3	4	4	3	4	4	4	4	4	4		1	1	1	1	5	1	1	1	1	0	0	1	0	0
1	1	1	1	1	15	3	2	2	3	4	4	4	3	3	3	4	4	2	5	4	2	2	4	3	4	4	4	4	4	3	3	4	4	3	3	1	1	1	1	5	1	1	1	1	0	1	0	0	0
3	1	2	2	1	15	4	2	4	4	4	4	4	2	2	3	1	4	3	4	2	2	1	4	4	4	4	4	4	4	4	3	3	4	4	3	1	1	1	2	4	1	1	0	1	0	1	0	0	0
3	2	1	1	0	15	4	5	4	5	5	5	5	3	1	1	1	1	2	5	4	2	2	4	4	4	4	4	4	4	4	4	4	4	4	4	1	1	1	1	5	1	1	1	1	1	1	0	0	0
3	1	1	1	0	15	2	1	4	4	4	2	4	3	2	3	1	1	5	5	3	3	2	3	1	2	2	3	3	3	4	4	4	4	3	1	1	1	1	1	4	1	1	1	1	0	0	0	0	0
4	1	2	1	0	15	1	1	3	3	1	3	2	5	5	3	5	5	5	5	2	5	5	2	1	1	1	1	3	4	4	4	4	4	3	2	1	1	1	1	4	1	0	1	1	0	0	1	0	0
3	1	2	2	0	15	2	2	4	4	4	3	3	2	2	1	3	2	2	5	3	4	5	4	4	3	4	4	4	3	3	3	4	4	4	4	1	1	1	3	4	1	0	0	1	0	1	0	0	0
3	1	1	1	1	15	3	3	3	3	4	3	2	2	2	2	2	2	2	3	2	3	2	3	2	3	3	3	4	3	3	3	4	4	3	2	1	1	1	1	2	1	1	1	1	1	1	0	0	0
3	1	2	2	1	15	2	4	4	4	4	2	2	1	1	1	1	1	3	4	3	4	4	3	3	3	3	3	2	2	3	1	3	4	3	1	1	1	1	1	4	1	1	1	1	0	1	0	0	0
3	1	2	2	1	19	5	5						3	3	2	3	3	2	4	3	3	3	4	4	4	3	3									1	1	1	3								0	0	0
3	1	1	1	1	15	1	2	5	5	5	1	5	5	5	5	5	5	4	2	1	1	3	4	1	3	3	4	4	4	4	4	4	4	4	1	1	1	1	1	2	0	0	0	1	0	1	0	1	0
5	1	1	1	0	15	2	4	3	5	5	2	3	5	4	2	5	4	3	5	3	4	3	3	2	4	3	2	3	4	3	3	4	3	4	2	1	1	5	5	4	1	0	0	0	0	0	1	4	1
3	1	1	1	1	15	2	3		4	3	3	5	1	2	2	1	2	5	5	5	3	3	4	3	3	3	3	4	3	3	3	3	3	3	2	1	1	1	1								0	0	0
3	1	1	1	1	15	5	4	3	5	3	2	5	1	1	4	3	3	2	3	3	5	5	1	1	1	1	1	4	3	4	3	2	1	4	1	5	3	4	5	4	0	1	1	1	1	1	2	0	3
5	1	2	2	0	15	2	3	5	5	5	4	5	4	3	2	4	5	3	5	3	4	2	3	2	4	2	2	4	4	4	4	4	4	3	2	1	1	1	1	5	1	1	0	1	0		0	0	0
3	1	2	2	1	16	5	5	5	5	5	5	5	1	5	5	5	4	4	5	3	1	2	4	1	4	4	3	4	1	4	3	4	4	4	3	1	1	1	1	5	0	0	0	0	0	0	0	0	0
3	1	2	2	1	15	4	5	5	3	4	3	3	5	2	1	2	1	1	2	2	1	1	3	1	3	2	4	4	2	3	4	4	4	4	3	1	1	1	1	5	0	0	0	1	1	0	0	0	0
3	1	1	1	0	15	3	3	3	3	3	3	3	5	5	5	5	5	3	3	1	2	3	4		3	4	4	4	4	4	4	4	4	4	4	1	1	1	1	4	0	1	0	0	0	1	0	0	0
9	2	2	2	1	13	4	5	4	5	5	3	1	1	1	1	1	1	1	4	2	2	3	1	2		1	1	4	4	3	3	2	2	3	3	5	5	5	5	4	0		1	0	0	0	0	1	0
3	1	1	1		15			4	5	5	2	2	4	2	4	1	2	4	5	2	3	4	3	1		3	4	3	3	3	4	4	4	4		1	1	1	1	5	1	1	1	1	0	0	0	0	0
1	9	9	9	1	15																																										0	0	0
3	1	1	1	1	#NULL!	2	2	5	3	3	2	5	3	3	2	1	4	1	5	4	1	1	4	3	2	4	4	4	4	4	4	4	4	4	3	1	1	1	1	4	1	1	1	0	0	1	0	3	0
3	2	2	2	0	17	3	4	4	4	4	3	5	4	1	2	1	1	5	5	4	5	4	4	4	4	4	4	4	3	4	4	4	4	4	3	1	1	1	1	4	1	1	1	1	0	0	0	0	0
4	1	1	1	0	17	1	1	1	1	2	1	1	1	1	1	1	1	4	5	5	4	5	4	4	4	4	4	4	4	4	3	4	4	4	4	1	1	1	1	5	1	1	0	1	1	0		0	0
3	1	1	1	0	17	2	2	2	2	3	2	3	4	2	2	2	1	4	5	4	4	3	4	3	4	4	4	4	3	3	4	4	4	4	4	1	1	1	1	5	1	1	1	0	0	0	0	0	0
3	1	1	1	1	17	3	5	3	3	4	5	4	3	3	4	2	1	4	5	4	5	4	4	3	3	3	3	4	3	4	3	4	4	4	1	1	3	1	1	5	1	0	1	1	0	0	2	0	0
3	1	1	1	1	17	5	4	4	4	4	4	4	3	4	5	5	5	5	5	3	5	3	4	3	3	3	4	4	4	4	3	4	4	4	4	5	5	5	5	5	0	0	0	1	0	0	2	5	2
3	1	1	1	1	17	1	1	4	5	5	4	5	4	4	4	1	1	3	4	5		1	4	3	4	4	4	4	4		3	3	4	4	3	1	1	1	1	5	1	1	1	1	0	0	2	0	0
3	1	1	1	0	17	4	4	4	4	4	4	4	2	1	1	1	1	4	5	5	5	5	4	2	4	3	4	3	3	2	3	4	4	4	4	1	1	1	1	4	1	0	1	0	0	1	0	0	0
3	1	1	1	0	17	2	1	2	2	4	1	4	2	1	1	1	2	5	5	4	4	4	4	4	4	4	4	4	4	4	3	4	4	4	3	1	1	1	1	3	1	1	0	1	0	1	1	0	0
4	1	2	1	0	17	3	3	4	4	4	3	3	3	1	1	1	1	4	5	4	3	3	4	3	4	4	4	4	1	1	3	4	4	4	4	1	1	1	1	4							0	0	0
3	1	1	1	1	17	3	2	2	2	2	2	2	3	2	2	2	2	4	5	4	4	3	4	4	4	4	4	3	1	1	2	4	4	4	4	1	1	1	1	4	1	0	0	1	0	0	1	0	0
3	1	1	1	0	17	3	5	5	5	3	5	5	4	2	1	3	1	4	5	3	5	4	4	3	4	4	4	4	3	3	3	4	4	4	4	1	1	1	1	4	1	1	1	1	0	0	0	0	0
3	1	1	1	0	17	1	1			1	1	1	5	5	5	5	5	5	5	5	5	5	4	4	4	4	4	4	4	4						1	1	1	1		1	1	1	0	0	1	1	0	0
3	1	1	1	1	17	3	4	3	4	4	5	4	3	1	2	1	2	5	5	5	5	5	3	1	1	1	2	4	4	3	4	4	4	4	4	1	1	1	1	4	0	1	1	1	0	1	2	1	0
3	1	1	1	1	17	2	2	2	2	3	3	2	1	1	1	1	1	4	5	4	4	4	4	3	4	4	4	4	4	4	3	4	4	3	3	1	1	1	1	4	0	1	0	1	1	0	0	1	0
4	1	1	1	0	17	3	3	3	3	3	3	5	1	1	1	1	1	5	3	5	5	5	4	4	4	4	4	4	3	3	3	4	4	4	4	1	1	1	1	4	1	1	0	1	1	1	0	2	0
3	1	1	1	0	17			3	4	4	4	5	4	2	4	1	3	1	4	2		5	4	2	3	4	4	4	2	3	2	3	3	4	2	1	1	1	1	4	1	1	1	1		1	1	0	0
3	1	1	1	1	17	2	2	2	2	1	3	3	2	1	1	1	1	5	5	5	5	4	4	4	4	4	4	4	3	3	4	4	4	4	4	1	1	1	1	5	1	1	1	1	0	0	0	0	0
3	1	1	1	1	17	3	2	3	2	2	2	4	3	2	2	1	1	5	5	5	4	4	4	3	4	4	4	4	3	3	4	4	4	4	3	1	1	1	1	5	0	0	0	0	0	0	0	0	0
3	1	1	1		17	4	3	5	3	1	2	1	4	2	4	5		5	4	3		1	1	2	3	4		3	1	3	1	1	2	2	2	3	4	4	5	3		0	0	1	0		2	1	1
3	1	1	1	0	17	2	1	3	3	3	4	1	3	1	1	1	1	5	5	5	5	5	4	3	4	4	4	4	4	4	4	4	4	4	4	1	1	1	1	5	1	1	1	1	0	0	0	0	0
3	1	1	1	1	18	4	3	3	4	3	4	3	3	2	2	2	2	4	3	4	3	4	4	4	4	4	4	4	4	4	4	4	4	4	4	1	1	1	1	5	1		1	1		1	3	5	4
3	1	1	1	1	17													2	2	2	2	2											1	1	1												0
4	2	2	2	1	18	5	5	5	3	4	5	5	3	1	1	2	2	3	3	3	3	2	4	4	4	4	4	3	3	3	3	3	3	1	1	1	1	1	1	4	0	0	0	0	0	0	0	0	0
3	1	2	2	1	#NULL!	1	2	5	5	5	3	3	3	2	1	1	1	5	5	5	3	5	4	4	3	4	4	4	4	4	4	4	4	4	4	1	1	1	1	3	1	1	0	0	0	1	0	0	0
5	1	1	1	1	16	1	5						3	1	1	1	1						4	4	4					4	4	4	4	4	4													1	0
3	1	1	1	1	16		3				5	1	4	5	2	1	5	4	4	5	3	4		1	2	3				1	2	3	3	3	3	1	1	1	1	5	1		1	1	0	1	1	4	4
9	1	1	1	1	16	3	3	5	4	5	5	1	3	2	2	3	3	4	3	2	3	4	4	3	4	4	3	3	4	2	4	4	4	4	2	1	1	1	1	5	0	1	0	0	1	1	0	4	4
5	1	9	2	1	16	3	3	4	4	4	5	4	2	1	1	1	2	2	2	3	2	2	4	4	4	3	3	4	4	3	4	4	4	4	2	1	1		1	1							1	3
3	1	1	1	1	16	3							3	4	2	1	1	3	4	4	3	1	4	4	4	4	4	3	3	3	3	3	3	3	3	1	1	1	1	5	1	1	1	1	1	1	1	0	0
5	1	1	1	1	18	5	5	5	5	5	5	5	5	2	3	1	5	2	2	1	3	3	2	1	3	1	3	4	4	4	3	1	1	1	1	1	1	1	1	4	1	0	0	1	0	0	2	1	2
3	1	1	1	1	16	3	3	5	5	5	2	4	1	1	1	1	1	4	4	4	4	4	4	2	3		3	3	2	1	2	3	1	4	3	3	3	1	1	5	1	1	0	1	1	1	1	3	0
3	1	1	1	1	16	3	3	3	3	3	3	3	5	5	5	2	3	3	3	3	3	3	3	3	3	3	3	2	2	2	2	2	2	2	2	1	1	1	1		0			0			0	0	0
5	1	1	1	1	#NULL!	2	4	3	3	4	4	5	5	2	3	3	3	5	5	4	5	5	2	2	2	1	1	4	3	2	1	4	3	3	3	1	1	1	1	4	0	0	1	1	1	1	1	1	0
7	1	1	1	0	18	3	3	4	5	5	3	3	4	2	3	3	2	5	5	3	5	5	4	4	4	4	4	3	2	4	4	4	4	4	4	1	2	1	1	3	0	1	1	1	0	1	1	0	0
8	1	1	2	1	17	3	3	3	3	3	3	4	4	3	3	5	3	5	5	5	4	4	4	2	2	1	4	3	3			4	3	4		1	1	1	1	2	0	0	0	0	0	0	3	0
5	1	1	1	1	18	2	2		3	3	3	4	2	1	1	1	1	3	4	3	3	3	3	4		4		4	3	3		3	3	2		1	2	1	1	4	1	0	1	0	0	0	0	0	0
3	1	1	1	1	17													4	4	4	4	3	3	3	3	3	3	2	3	2	2	3	3	2	3	1	1	1	1	4	0	0	0	0	0	0	1	0	0
3	1	1	1	1	17	5	5	4	5	4	2	3	2	5	5	3	2	2	1	5	2	4	3	1	3	4	1	3	4	4	3	1	1	4	4	1	4	1	1	3	1		1				2	0	1
3	1	1	1	1	17	3	4	3	4	4	4	4	3	1	3	1	1	4	4	3	4	4	4	3	4	3	4	4	4	3	3	4	4	3	3	1	1	1	1	5	0	0	1	1	0	1	1	3
3	1	1	2	1	17	5	4	4	4	4	5	4	2	2	2	1	2	4	4	4	4	4	4	4	4	4	4	4	4	3	3	4	4	4	4	1	1	1	1	4	1	1	0	1	0	0	1	0	0
3	1	1	1	1	17													3	3	4	4	4	4	4	4	4	4	3	4	4	4	4	4	4	4	1	1	1	1	5	1	1	1	1	1	1	0	0	0
3	1	1	1	1	13	1	4	5	4	5	4	5	3	3	2	2	2	5	1	5	3	1	4	4	4	4	4	4	3	3	4	4	4	4	2	1	1	1	1	2	0	1	1	1	1	1	0	0	0
5	1	1	1	1	19	3	4	4	4	5	5	5	2	1	1	1	1	4	4	4	4	3	2	2	3	3	2	3	4	4	2	2	4	4	3	1	1	1	1	5	1	0	0	1	0	1	2	0	0
5	1	1	1	1	17	2		1	4	4	3	4	3	4	3	2	2	5	1		5	3	1		1	1	1									2	1	1									1	2	0
3	1	1	1	1	18	3	5	3	1	5	5	5	4	5	4	1	2	4	4	5	3	3	4	4	4	4	4	4	4	4	4	1	4	3	3	1	1	1	1	5	0	1	1	1	0	1	2		0
3	1	1	1	1	18	3	3	5	5	5	5	3						3	4	4	4	3	1	3		2	4	4	2	3		3	1	3		5	5	5	5	2		0	1	1	1		0	0	0
3	1	1	1	1	17
3	1	1	1	1	17																															1												0	0
3	9	2	2	1	17
3	1	2	2	1	17	3	3	3	3	3	4	4	2	2	3	2	2	3	3	3	4	4	4	3	4	4	4	3	4	4	4	4	4	4	3	2	2	2	3	5	0	1	1	1	1	1	1	0	0
3	1	1	1	1	18	1	1	2	5	5	5	4	2	2	2	2	2	3	4	3	3	3	4	4	4	4	4	4	4	4	4	4	4	4	4	1	1	1	1	4	0	1	0	0	0	1	2	0	0
7	1	1	1	1	17	3	5	5	5	4	4	5	4	2	4	2	3	3	4	5	2	3	2	2	1	1	3	3	4	4	3	4	4	3	1	1	1	1	1	4	1	0	1	1	0	0	1	0	1
3	1	2	2	0	17	2	2	3	4	4	3	3	5	2	1	1	1	4	5	5	4	3	4	3	4	4	4	4	4	4	4	4	4	4	3	1	1	1	1	2	0	0	1	1	0	0	0	0	0
3	1	1	1	1	17					3	3	3	2	1	1	1	1	3	3	4	5	4	3	2	3	3	3	4	3	2			4	3	3	1	1	1	1	3	1	1	1	1	0	0	0	0	0
4	2	1	2	1	19	2	4	2	4	4	3	3	2	1	1	2	1	4	4	5	4	3	4	2	3	3	4	3	3	4	4	3	3	2	1	2	2	2	1	4	1	1	1	1	0	1	0	0	0
3	1	2	2	1	17	3	2	3	3	5	3	3	2	1	1	2	2	3	5	5	4	4	2	2	1	1	2	4	2	4	2	4	4	2	1	1	1	1	1	1	1	0	1	1	0	0	1	0	0
3	1	2	2	1	18	3	3	3	4	4	4	3	1	1	2	1	1	3	4	3	4	3	4	1	3	3	3	4	3	3	3	2	4	3	3	3	3	3	2	4	0	0	0	1	0	0	0	0	0
7	1	1	1	0	13	3	3	3	3	3	3	3	3	2	1	1	1	5	5	5	5	5	4	4	4	4	4	4	4	4	4	4	4	4	4	1	1	1	1	3	1	1	1	1	0	1	0	0	0
3	1	1	1	0	18			5	5	5			5	5	5								4																								0	0	0
3	1	1	1	1	20	3	3	3	3	4	2	5	3	2	1	1	1	1	5	4	5	5	3	4	2	2	2	4	4	4	4	4	4	4	4	1	1	1	1	1	1	0	0	1	0	0	0	5	0
5	1	1	1	0	17		3	3	3	3	3	3	4	1	3	2	1	3	3	4	4	4	4	4	4	4	4	4	4	3	4	4	4	4		1	1	1	1	4							0		0
8	1	1	1	0	20	2	2	3	3	4	4	4	3	3	2	1	1	5	5	5	5	5	2	1	3	2	3	3	3	2	2	3	3	4	3	1	1	1	1	4	1	1	0	0	0	0	0	0	0
3	1	1	1	0	20	2	5	4	4	4	3	1	2	2	1	1	1	4	3	4	3	4	4	3	4	4	4	4	4	4	4	4	4	4	4	1	1	1	1	3	1	1	1	1	0	1	0	0	0
3	1	1	1		20	3	4	4	4	4	4	5	4	3	2	1	1		4	3	3	4	3	2	4	4	2	3	1	1	1	3	3	3	2	1	1	1	1	4	1	0	0	1	0	0	2	1	0
3	1	2	2	1	18	3	4	5	5	5	3	3	4	3	3	3	3	4	5	4	4	5	4	3	3	2	4	4	4	4	4	4	4	4	3	1	1	1	1	1	0	0	1	0	0	0	1	2
3	2	1	1	0	17	2	1	3	4	2	2	2	5	4	3	4	3	4	5	3	2	3	4	2	1	1	2	2	1	3	2	3	3	3	3	1	2	1	2	1	0	0	1	1	1	1	1	0	0
3	1	1	1	1	16	5	5	3	4	5	5	5	3	1	1	2	1	4	4	1	1	3	4	3	4	4	4	3	3	3	4	3	3	2	1	1	1	1	1	2	0	0	0	0	0	0	1	1	1
4	1	1	2	0	20	3	2	4	5	5	4	5	2	1	1	1	2	5	5	4	5	5	4	3	4	3	4	4	4	4	4	4	4	4	3	1	1	1	1	2	0	1	1	1	0	0	2	4	1
5	1	1	1	0	20	2	2	4	2	4	2	2	1	1	1	1	1	4	5	5	5	5	4	2	2	4	4	4		3		4	4	4	4	2	2	2	2	5	0	0	0	1	1	1	1	1	1
5	1	2	2	0	18	1	5	3	5	5	4	5	2	1	1	1	1	1	5	5	3	4	1	2	1	2	1	4	4	3	4	4	4	4	4	1	1	1	1	5	1	1	1	1	1	1	0	0	0
5	1	2	1	0	17	1	2	1	3	3	3	3	3	3	2	3	2	5	5	4	5	5	4	4	4	4	4	4	3	3	3	4	4	4	3	1	1	1	1	5	1	1	1	1	0	1	1	0	0
1	1	1	1	0	17	1	2	5	3	3	4	4	3	3	2	1	1	1	4	4	5	2	3		4	4	4	3	1	3	1	4	4	2	1	1	1	1	1	4	1	0	1	1		0	1	1	0
4	1	1	1	0	17	2	1	4	4	5	3	2	4	1	1	3	1	4	5	5	4	5	3	2	4	3	4	4	3	4	4	4	4	4	3	1	1	1	1	4	1	0	0	1	0	0	0	0	0
4	1	1	2	0	17	4	4	3	4	4	4	4	4	2	2	2	1	2	5	4	3	3	4	4	1	2	3	4	3	4	4	4	4	4	3	1	1	1	1	4	1	0	1	0	0	0	1	0	0
3	1	1	1	0	17	3	3	3	4	4	3	4	5	5	3	2	3	2	5	5	3	1	4	3	3	3	3	4	4	4	4	4	4	3	3	1	2	1	2	4	1	1	1	1	0	1	1	0	0
3	1	1	1	0	17	4	3	1	2	2	2	3	3	3	2	1	1	3	5	5	4	4	4	3	4	4	4	4	4	4	4	4	3	3	3	1	1	1	1	4	1	1	1	1	1	1	0	0	0
3	1	1	1	0	17	3	2	2	5	5	1	4	2	4	2	5	1	1	5	5	4	4	4	4	2	4	4	4	3	4	2	4	4	4	1	1	1	1	1	5	1	1	0	0	0	1	1	4	1
5	1	2	2	0	17	3	2	5	5	5	4	3	4	1	1	2	2	3	4	3		2	4	4	4	4	4	3	3	3	3	4	4	4	4	1	1	1	1	5	1	1	1	1		1	0	0	0
3	1	1	1	0	17								3	2	1	2	1	4	5	4	4		4	4	3	4	4	4	4	3	3	4	4	3	3	1	1	1	1	4							0	0	0
3	1	1	1	1	17	2	5	2	3	4	5	5	4	1	1	1	1	4	4	3	3	4	4	4	4	4	4	4	3	3	3	2	3	2	3	2	2	2	1	5	1	1	1	1	0	1	0	0	0
3	1	2	2	0	17	3	4	3	4	4	4	5	4	2	1	1	4	4	4	5	3	3	3	2	2	2	2	4	2	2	1	2	3	2	2	1	2	1	2	3	1	0	1	1	0	0	0	0	0
5	1	2	1	1	#NULL!	1	1	1	1	1	1	1	2	2	1	1	2	3	5	4	4	4	4	4	4	4	4	3	3	4	3	4	4	4	4	1	1	1	1	5	1	1	1	1	1	0	0	0	0
3	1	1	2	0	17	1		3	3	2	3	3	2	1	1	1	1	3	5	5	3	3	4	4	4	4	4	4	4	4	3	4	4	4	4	1	1	1	1	4	1	1	1	1	0	0		0	0
3	1	1	1	1	17	3	3	3	3	3	3	3						4	4	4	4	4	3	3	3	3	3	3	2	3	2	3	2	2	3	1	1	1	1	5	1	1	1	1	1	1	0	0	0
3	1	1	1	1	17	3	3	3	3	3	3	3	3	3	3	3	3	5	5	5	5	5	1	1	1	1	1	4	4	4	4	4	4	4	4	5	5	5	5	3			1	1			4	0	0
5	2	2	2	0	17	3	4	5	5	5	5	5	4	1	1	1	4	1	5	5	5	4	4	4	4	4	4	4	4	4	4	4	4	2	2	1	1	1	1	5	1	0	1	1	0	1	0	0	0
3	1	1	1	0	17	1	1	3	2	3	1	3	1	1	1	1	1	4	5	5	4	4	4	3	4	4	4	3	2	2	2	4	3	4	3	1	1	1	1	4	1	1	1	0	1	1	1	1	0
3	1	1	1	0	17	3	5	2	5	1	2	2	5	3	1	1	1	3	4	4	3	4	4	4	4	4	4	4	3	3	4	4	4	4	4	1	1	1	1	4	1	1	0	1	1	1	0	0	0
3	1	1	1	1	17	2	3	4	4	4	5	3	5	4	4	3	1	4	4	5	4	4	4	1	3	3	3	4	3	3	3	4	4	4	3	1	3	1	1	5	1	1	1	1	0	1	1	0	0
3	1	2	2	1	17	2	2	4	4	4	2	4	4	2	2	2	4	3	5	4	4	3	3	2	4	4	3	4	3	4	2	4	3	4	4	1	1	1	1	2	0	1	0	1	1	1	1	0	0
1	2	2	2	0	18	5	3	5	5	5	5	5	4	2	2	2	2	5	5	4	5	4	4	3	4	4	4	2	3	4	4	4	4	4	3	1	1	1	1	5	1	1	1	1	1	1	0	0	0
3	2	2	2	0	17	5	1	5	5	5	5	5	4	2	2	2	2	4	5	3	4	4	4	3	4	4	4	4	4	4	4	4	4	4	3	1	1	1	1	1	1	1	1	1	1	1	0	0	0
3	1	2	2	1	17	3	3	3	3	3	3	3	1	1	1	1	1	1	1	1	1	1	4	4	2	1	4	3	3	3	1	4	4	4	3	1	1	1	1	3	0	0	0	0	0	0	0	0	0
3	1	1	1	1	17	1	1	1	1	1	5	5	1	1	1	1	1	5	5	5	5	5	4	4	4	4	4	4	4	4	4	4	4	4	4	1	1	1	1	5	1	1	1	1	0	1	1	0	0
3	1	1	1	0	17	3	4	3	4	3	2	2	2	2	1	1	1	4	4	4	4	4	4	3	4	3	3	4	3	3	3	3	3	3	3	2	3	2	2	4	1	0	1	1	0	0	1	0	0
3	1	1	1	0	17	4	5	3	3	3	4	4	3	1	1	1	1	1	5	5	4	5	3	4	3	4	3	4	2	2	2	4	4	4	2	1	1	1	1	3	0	0	0	1	0	1	1	2	1
3	1	1	1	1	17		5		3	3		3	2	1			1	4	4	4	3	3	4	4	3	3	3	4	3					3	3					5								0	0
3	1	1	1	1	17	4	1	3	3	3	5	5	1	2	4	1	1	5	5	5	5	5	3	3	3	3	3	4	4	4	4	4	4	4	4	1	1	1	1	5	1	0	0	1	0	0	0	0	0
3	1	1	1	0	17	2	4	5	5	5	3	4	4	4	1	1	3	4	4	5	4	4	3	4	4	4	4	4	3	2	4	4	4	4	4	1	3	1	1	4	1	0	0	1	0	0	0	0	0
3	1	1	1	0	17	1	1	4	3	1	1	1	1	1	1	1	3	4	4	4	4	4	4	3	4	4	4	4	4	4	4	4	4	4	3	1	1	1	1	1	0	0	1	0	0	0	0	0	0
3	1	1	1		17	3	4	4	3	4	4	5	4	4	3	3	2	3	4	4	3	3		2	4	3		3			2	3	3	3	2	1	2	1	2	4	1	0	1	1	1	0	2	0	0
3	1	1	1	0	17	5	5	5	4	4	5	5	4	2	1	1	1	3	4	4	2	3	3	2	3	2	2	3	4	3	2	2	3	2	1	5	5	5	5	3	1	0	1	1	0	1	1	0	0
7	1	1	1	0	17	2	1	3	3	3	5	5	5	5	5	5	2	5	5	4	5	5	3	1	2	2	4	3	4	4	4	4	4	4	1	1	1	1	1	4	0	0	1	1	0	0	1	0	0
3	1	1	1	1	17	2	2	3	3	3	3	3	2	3	3	2	1	5	4	3	3	4	4	4	3	4	4	4	4	4	4	4	4	4	4	1	1	1	1	4	0	0	0	0	0	0	0	0	0
3	1	2	2	0	17	5	5	5	3	1	3	5	4	2	1	5	5	3	4	5	3	2	4	2	3	3	4	4	3	2	3	4	4	2	1	1	1	1	3	4	1	1	1	1	0	0	0	0	0
3	1	1	1	1	#NULL!	3	4	1	5	2	1	4	1	1	1	1	1	3	4	4	3	4	4	4	4	4	4	4	3	3	4	4	4	4	3	1	1	1	1	5							0	0	0
3	1	1	1	0	17	1	1	5	4	5	5	5	4	2	4	1	1	5	5	4	5	5	4	4	3	4	3	4	1	1	1	4	4	4	2	1	1	1	1	4	0	1	0	0	1	1	1	3	0
3	2	2	2	0	18	5	5	5	5	5	5	5	1	1	1	1	1	5	4	5	3		4	4	4		3	4	3	3	4	4	4	4	4	1	1	1	1	5	1		1	1	0	0	0	0	0
5	1	1	2	0	17	3	4	3	3	3	2	2	4	4	2	1	3	2	5	4	4	2	4	4	4	4	4	3	4	3	2	4	4	3	2	1	1	1	1	5	1	1	1	0	0	1	1	0	0
3	1	1	1	0	17	4	4	3	5	5	3	4	3	2	2	3	3	4	4	4	4	4	4	4	4	4	4	4	3	3	3	4	4	4	3	1	1	1	1	4	1	1	1	1	0	1	0	0	0
3	1	2	2	0	17	2	1	2	1	5	2	3	3	1	1	1	1	4	4	4	3	3	4	4	3	2	4	4	2	2	2	4	4	4	3	1	1	1	1	5	1	1	1	1	1	0	0	0	0
3	1	1	1	0	17	4	5	5	5	5	5	5	4	5	5	2	2	5	5	5	5	5	3	3	3	3	3	4	1	1	1	1	1	3	1	1	1	1	1	3	0	0	0	1	0	1	2	3	0
3	1	2	2	0	17	3	2	3	4	4	3	4	1	1	1	1	1	3	5	5	5	5	4	4	4	4	4	4	2	1	3	4	4	4		1	1	1	1	4	1	0	1	0	0	0	0	0	0
3	1	1	1	1	17	1	3	1	4	3	4	3	2	1	2	1	1	5	5	5	5	5	4	4	4	4	4	4	4	4	4	4	4	4	4	1	1	1	1	3	0	1	1	1	0	0	0	0	0
3	1	1	1	0	17	4	4	4	4	5	3	4	5	3	4	2	1	4	5	4	4	4	4	4	4	4	4	4	3	3	3	3	4	4	3	1	1	1	1	3	1	1	1	1	1	1	0	0	0
3	2	2	2	0	18	3	4	5	5	5	3	4	1	1	1	1	1	5	5	5	5	5	4	2	3	4	4	3	3	3	3	3	3	4	3	1	1	1	1	4	1	0	0	1	0	0	0	0	0
3	1	1	1	0	16	2	4	5	3	5	4	5	5	3	4	1	2	4	2	1	3	1	3	1	2	1	3	4	4	4	4	4	4	4	3	1	1	1	1	4	1	1	1	1	1	0	0	0	0
4	2	2	2	0	16	5	4	4	5	4	5	5	4	3	2	1	1	4	4	3	3	1	4	4	4	4	4	4	3	3	4	3	3	3	3	1	1	1	1	5	0	1	1	1	0	1	1	0	1
3	1	1	2	0	16	3	4	5	3	5	5	5	4	2	3	1	2	3	5	2	4	3	3	3	3	3	3	4	3	3	3	3	3	4	2	2	2	2	2	4	1	1	0	0	0	1	0	0	0
1	1	1	1	0	16	3	3	3	4	4	4	4	2	1	1	1	1	3	5	3	5	2	4	3	3	2	3	4	2	1	1	4	4	4	3	1	1	1	1	4	0	0	1	1	0	1	0	0	0
3	1	1	2	0	16	1	3	3	3	4	1	3	3	2	1	3	3	4	5	1	3	3	4	4	4	4	4	4	3	3	3	4	4	4	4	1	1	1	1	2	0	0	1	1	0	0	0	0	0
3	1	1	1	1	16	4	4			4	4	5	2	1	2	1	1	4	5	4	3	3	4	4	4	4	4	4	3	3	3	4	3	4	4	1	1	1	1	3	1	1	0	0	0	0	0	0	0
3	1	1	1	1	16	4	4			4	4	5	2	1	2	1	1	4	5	4	2	3	4	2	4	4	4	4	3	4	3	4	4	4	4	1	1	1	1	3	1	1	0	0	0	0	0	0	0
3	1	1	1	0	15	2	4	5	5	5	5	5	2	1	1	1	1	4	5	5	3	3	4	2	4	2	4	3	3	3	3	2	4	4	3	1	1	1	1	4	0	0	0	1	0	0	2	1	0
3	1	1	1	0	19	1	2	3	3	3	3	3	2	2	2	2	2	3	2	2	2	2	3	1	3	3	3	2	2	2	2	2	2	2	2	4	4	4	4	3							1	0	0
3	1	1	1	1	16	1	1	2	2	3	2	3	2	1	1	1	1	5	5	5	4	4	4	4	4	4	4	4	3	3	3	3	3	4	3	1	1	1	1	4	1	1	1	1	0	0	0	0	0
3	1	1	1	0	16								4	1	1	1	1	2	1	1			4	3	4	4	4	4	4	4	4	4	4	4	4	1	1	1	1	5		1							0
3	1	1	1	0	16	1	1	3	4	5	4	4	4	2	1	1	1	3	5	4	3	3	4	4	4	4	4	4	4	3	3	4	4	4	3	1	1	1	1	4	1	1	1	1	0	1	0	3	0
3	1	1	1	0	16	3	4		5	4	3	3	3	1	2	2	1	3	4	3	3	3	4	2	4	4	3	4	2	2	1	2	3	2	1	2	2	2	2	4	1	1	1	1	0	1	2	0	0
3	1	1	1	1	16	3	4	4	4	4	4	4	2	1	1	1	1	2	4	4	3	3	4	3	4	4	3	4	3	2	2	3	3	3	3	2	3	2	2	2	1	1	1	0	0	0	0	0	0
3	1	1	1	0	16	3	3	4	4	4	4	4	4	2	1	1	2	4	5	1	3	4	4	3	4	4	3	1	1	1	1	1	1	1	2	1	1	1	1	5	1	1	1	1	0	1	0	0	0
3	1	1	1	0	16	4	4	4	4	4	4	4	2	2	3	3	3	2	5	5	2	2	4	2	4	4	3	4	3	3	3	2	2	4	3	1	1	1	1	4	1	1	0	0	0	1	0	0	0
3	1	1	1	0	16	1	1	4	3	5	2	4	3	2	2	1	2	5	4	4	5	4	4	3	4	3	3	4	4	4	4	4	4	4	4	1	1	1	1	4	1	1	1	0	0	0	0	0	0
3	1	1	1	1	16	4	2	3	1	4	3	2	1	2	3	2	3	2	4	3	4	2	3	2	4	3	3	2	3	1	2	2	2	3	1		1	3	2	3	1	0	0	0	1	1	0	0	0
3	1	1	1	0	16	3	5	3	3	4	3	4	1	1	1	2	1	4	5	3	3	3	4	3	4	4	3	4	3	3	3	3	3	3	2	1	1	1	1	2	0	1	0	0	0	0	0	0	0
3	1	1	1	0	18	4	5	5	5	5	3	5	5	3	3	3	3	3	4	3	2	3	4	1	3	3	2	3	3	3	3	2	3	3	2	1	1	1	1	4	1	0	0	1	0	1	0	1	1
4	1	1	1	0	17								2	2	2	1	1	3	5	4	3	4	4	4	4	4	4	4	3	3	3	4	4	4	3	1	1	1	1								0	0	0
5	1	1	1	0	17	3	4	5	5	5	5	5	5	4	1	3	1	3	5	4	3	4	3	4	3	4	3	4	3	3	4	2	4	4	1	1	1	1	1	4	1	0	1	1	1	1	0	0	0
3	1	1	1	0	18								5	5	5	2	5	2	5	4	1	1	3	4	4	2	4	4	4	3	4	4	4	4	2	1	1	1	1	5	0	1	1	0	1	1	0	4	4
3	1	1	1	0	18								5	5	5	2	5	2	5	4	1	1	3	4	4	2	4	4	4	3	4	4	4	4	2	1	1	1	1	5	0	1	1	0	1	1	0	4	4
3	1	1	1	0	17	3	4	3	3	1	5	2	5	5	1	5	3	4	4	3	3	5	4	4	4	4	4	4	3	4	4	4	4	4	4	1	1	1	1	4	1	1	1	1	0	0	0	0	0
3	1	1	1	0	17		3	3	4	4	4	5	2	1	1	1	1	3	5	4	4	4	3	2	2	3	2	4	3	3	4	3	3	4	2	1	1	1	1	4								0	0
3	1	1	1	0	17		3	3	4	4	4	5	2	1	1	1	1	3	5	4	4	4	3	2	2	3	2	4	3	3	4	3	3	4	2	1	1	1	1	4								0	0
5	1	1	1	0	17	3	2	4	4	5	3	3	4	2	5	2	1	1	4	1	1	2	2	3	1	1	2	3	3	4	3	4	4	4	3	1	1	1	1	4	1	0	0	1	0	0	0	0	0
5	2	2	1	0	17	2	4						3		2	1	1	3	4	1	4	3	4	4	4	4	4	3	3	3	3	3	3	3	2	1	1	1	2		0	0	0	1	0	0	0	0	0
9	1	1	1	1	17	4	4	4	4	4	4	4	4	4	4	2	2	3	5	4	3	3	1	1	1	1	2	2	1	1	1					3	3	5	3	5	0	0	1	1	0	1	1	2	4
5	2	2	2	0	18		5	4	4	4	4	2	2	2	2	2	2	3	4	1	4	4		1	4	3	3	4						3	2	1	1	1	1	5	1	1	1	1	0	1	0	1	0
3	1	1	1	0	19	4	4	4	4	4	4	4	2	1	1	2	1	3	5	1	3	2	4	4	4	4	4	3	1	1	1	4	4	4	4	1	1	1	1	5	1	1	1	0	0	0	0	0	0
3	1	1	1	0	18	2	3	4	4	5	2	2	3	1	1	1	1	4	3	5	3	3	4	4	3	4	4	4	3	4	3	4	4	4	4	1	1	1	1	5	1	1	0	0	0	0	0	0	0
5	1	1	1	0	17																																			5							2
7	2	2	2	0	17	3	3	3	3	3	3	3	3	2	2	2	2	2	5	4	3	3	4	4	4	4	4	4	3	2	2	2	3	3	2	1	1	1	1	5	1	1	1	1	1	1	1	3	1
8	1	2	2	0	17	4	4	4	3	3	4	4	5	3	3	4	3	3	4	4	2	2	3	3	2	2	3	3	1	1	1	1	3	3	1	1	1	1	1	5	1	1	1	1	0	1	1	1	0
3	1	1	1	0	17	3	4	4	4	2	3	5	2	2	1	1	1	1	4	3	2	3	3	1	2	2	3	4	4	4	4	4	4	4	2	1	1	1	1	5	0	0	1	1	1	1	3	0	0
9	1	1	1	0	18													2	2	2	2	2														1				4							1	4	0
1	1	1	1	0	18	3	5	5	5	5	4	5	4	3	1	1	3	3	4	5	2	4	4	4	4	4	4	4	3	4	4	3	4	3	1	1	1	1	1	5	0	1	1	1	0	0	2	4	1
3	1	1	1	1	17	3	4	3	5	5	3	5	4	3	3	4	2	4	5	4	4	2	4	3	3	4	3	1	2	2	2	1	1	1	3	1	2	1	2	4	1	1	1	1	1	1	1	3	0
3	1	1	1	0	17	2	4	3	3	3	3	2	3	2	2	3	2	1	4	3	3	3	3	3	3	3	3	3	3	3	2	3	3	2	1	1	1	1	1	4	1	1	1	0	0	1	0	0	0
8	1	2	1	0	17	4	2	5	3	2	5	4	5	5	3	4	5	4	3	3	4	3	2	4		3	4	2	1	1	1	2	2	1		4	2		3	5							2		3
1	1	1	2	0	18	4	5	1	4	3	3	3	2	3	3	1	2	4	5	4	3	4	4	4	4	4	4	4	4	4	4	4	4	4	4	1	1	1	1	5	1	1	1	1	1	1	2	2	1
1	1	1	1	0	17		3	3	3	3	3	3						1	5	3	3	3	4	3	4	3	3	3	4			4	4	3		1	1	1	1	4	0	0	0	1	0	0	1	0	0
3	1	1	1	0	18		3	5	5	5	4	5	4	5	2	1	2	2	3	3	2	2	4	3	3	3	4	4	4	3	3	4	4	4	4	1	1	1	1	3	0	1	1	1	0	1	1	1	0
9	1	1	1	0	17	1	3	4	3	4	2	3	3	3	2	1	1	4	4	4	3	3	3	4	4	4	4	4	4	3	3	4	4	4	4	1	1	1	1	3	1	1	1	1	1	1	1	3	1
4	1	1	2	0	18	3	3	3	3	3	3	3	3	3	2	2	3	3	5	5	4	3	3	2	2	2	3	3	3	3	3	3	3	3	3	1	1	1	1	3	1	1	1	1	1	1	1	1	0
1	1	1	1	0	18	3	4	4	4	3	3	3	3	2	2	3	2	4	3	3	4	3	4	4	4	4	4	3	3	3	3	3	3	3	1	2	2	2	3	4	1	1	0	0	0	0	0	0	0
3	1	2	1	0	18	3	3	3	4	4	2	4	2	3	1	1	1	4	5	5	4	4	4	2	3	4	4	4	4	3	3	4	4	4	2	1	1	1	1	4	1	0	1	1	0	1	0	0	0
3	1	1	1	0	17	2	2	4	4	4	2	3	5	4	4	1	1	4	5	4	4	5	4	2	3	3	4	4	3	3	4	4	4	4	3	1	1	1	1	4	1	0	1	1	0	1	1	0	0
3	1	1	1	0	17	2	2	2	3	3	3	4	3	1	1	2	1	4	5	5	4	4	4	4	4	4	4	3	3	3	3	4	3	3	2	2	2	2	2	4	0	1	1	1	0	0	2	1	1
3	1	1	1	0	20	3	3	3	5	4	5	2	1	2	3	5	5	3	5	5	5	5	1	1	2	3	3	4	3	4	4	3	3	3	1	1	1	1	1	3	1	0	0	0	0	0	1	0	0
3	1	2	2	1	17	5	5	4	5	5	5	5	1	1	2	1	1	3	4	4	3	4	3	3	2	2	2	3	3	3	3	3	3	3	3	1	1	1	1	4	1	1	1	1	0	0	0	0	0
3	1	1	2	0	17	3	4	3	4	4	4	4	2	1	1	1	1	2	4	3	2	2	4	3	4	4	4	4	3	3	3	3	4	3	1	1	1	1	1	3	0	1	0	0	0	1	0	0	0
3	1	1	1	1	17	4	4	3	4	4	4	4	4	3	2	1	1	1	5	4	1	1	4	4	4	4	4	4	4	4	3	3	2	4	1	1	2	1	2	5	1	1	1	0	1	1	1	0	0
3	1	1	1	0	17	4	4	3	4	4	4	4	4	3	1	2	2	2	5	4	1	2	4	3	3	4	4	4	3	3	2	2	3	4	2	1	2	1	2	5	0	1	0	1	0	0	0	0	0
3	1	1	1	0	17	3	3	3	3	3	3	3	2	2	2	1	1	3	5	5	3	3	4		4	3	3	4	3	3	3	3	3	3	3	1	1	1	1	5							0	0	0
3	1	1	2	0	17	3	2	1	5	5	4	5	4	2	1	3	1	2	5	4	4	3	4	4	4	4	4	4	2	4	2	3	4	4	2	1	1	1	3	4	0	1	1	1	0	1	2	0	0
3	2	2	2	0	18	3	5	1	5	1	5	5	5	3	3	1	1	3	5	4	3	3	4	4	4	4	4	4	2	3	1	4	4	4	4	1	1	1	1	5	1	1	0	0	0	1	0	0	0
5	1	1	1	1	17	1	3			3	1	3	2	2	1	1	1	4	4	3	4	3	4	3	4			4	3		2	2		3	4	1	1	1	2	5	1	1		0	0	0	0	0	0
3	1	1	1	0	18	3	5	4	2	2	1	2	3	2	2	3	2	3	5	2	4	4	4	3	4	4	4	4	4	4	3	4	4	4	4	1	1	1	1	5	1	1	1	1	1	1	0	0	0
3	1	1	1	0	17	1	2	4	1	3	1	5	1	1	1	1	1	3	5	4	3	1	4	3	4	4	4	4	4	3	4	3	4	3	1	1	1	1	1	5	0	1	1	1	1	0	1	0	0
3	1	1	1	0	17	3	4	2	5	2	4	5	3	2	3	1	1	3	5	4	3	3	4	4	4	4	4	4	1	3	2	4	4	4	4	1	1	1	1	5	1	1	1	0	0	0	0	0	0
3	1	1	1	1	17	3	3	4	4	4	3	5	1	1	1	1	2	3	4	4	3	3	4	3	4	2	3	4	2	3	2	4	4	4	4	1	2	1	1	5	1	0	1	1	0	0	1	0	0
3	1	1	1	0	17	2	5	4	4	4	3	5	4	1	1	3	1	2	5	4	3	3	4	3	1	1	1	4	2	3	2	4	4	3	3	1	1	1	2	4	1	1	0	0	1	0	0	0	0
3	1	1	1	1	17	2	5	3	4	4	2	4	2	2	2	2	2	3	4	4	4	4	4	2	3	3	4	4	3	3	3	3	3	2	2	1	1	1	2	5	1	0	1	0	0	1	0	0	0
5	1	1	1	1	17	1	1	1	4	4	3	4	2	1	1	1	1	4	5	5	4	5	3	2	3	2	4	3	2	2	2	4	3	3	3	1	1	1	1	4	1	1	1	1	1	0	2	0	0
3	1	1	1	0	17	3	3	2	3	5	3	5	3	2	2	1	1	4	5	5	4	3	4	4	4	4	4	4	4	4	4	4	4	4	3	1	1	1	1	4	1	1	1	0	1	1	1	0	0
3	1	1	1	0	17	3	3	3	2	3	3	4	4	3	3	2	1	3	4	2	2	3	3	2	2	2	3	3	2	3	3	4	4	3	2	1	1	1	1	4	0	0	0	0	0	0	0	0	0
3	1	2	2	1	17	3	3	3	3	3	4	4	3	1	1	1	1	2	4	3	3	3	4	3	3	3	3	4	2	1	1	1	4	3	2	1	1	1	1	5	0	1	1	1	1	0	1	0	0
3	1	2	2	1	17	3	4	3	3	4	4	4	4	3	3	1	1	4	4	4	4	4	4	2	3	3	3	4	3	3	4	3	3	4	3	1	1	1	1	4	0	0	0	1	0	0	0	0	0
3	1	1	1	1	17	2	1	3	2	2	2	1	2	2	1	1	1	3	5	5	4	5	4	4	4	4	4	4	4	4	4	4	4	4	4	2	2	1	1	5	1	1	1	1	0	1	1	0	0
3	1	1	1	1	17	4	5	4	4	4	5	5	1	1	2	1	1	2	5	4	3	4	4	4	4	4	4	4	3	3	3	4	4	4	4	1	1	1	1	5	0	1	0	1	0	1	4	3	2
3	1	1	1	0	17	3	3	1	4	2	4	5	3	2	3	3	3	3	4	4	3	3	4	3	4	4	4	3	4	4	3	4	4	4	3	1	1	1	1	3	1	1	1	1	0	1	0	0	0
3	1	1	1	1	17	1	5	3	4	5	2	5	1	1	1	1	1	2	5	4	5	4	4	4	4	4	4	1	1	1	1	1	1	1	1	1	1	1	1	5	1	1	0	1	0	0	0	0	0
3	1	1	1	0	17	4	4	3	4	4	3	4	4	4	2	3	4	3	5	3	3	3	3	3	3	3	2	3	3	2	3			4	3	1	1	1	1	4	0	0	1	1	0	1	0	0	0
3	1	1	1	0	17	2	4	3	3	2	3	4	3	4	2	3	2	3	5	3	3		4	4	4	4	4	4				4	3	4	4	1	1	1	1	5	0	1	1	1	1	1	1	4
3	1	1	1	0	17	2	2	5	5	5	3	4	5	4	5	1	1	3	4	2	4	1	4	2	4	3	3	4	3	3	2	4	4	3	1	1	2	1	2	3	1	1	1	1	0	0	0	0	0
5	2	2	2	1	17	5	5	5	5	5	5	5	1	2	3	1	1	4	3	3	2	3	4	4	4	4	4	4	4	4	4	4	4	4	3	1	1	1	1	5	0	1	0	1	0	1	0	0	0
3	1	2	2	1	17	5	4	4	4	3	4	5	1	1	1	1	1	3	3	3	3	3	4	3	4	2	3	4	3	3	3	3	3	3	3	1	1	1	1	3	0	1	1	1	0	1	0	0	0
3	1	2	2	0	18		5	4	5	5		5	3	2	2	1	1		4	4		1	4	4	4	4	4	4	4	4	4	4	4							5	1	1	0	1	0	0	0	0	0
5	1	1	1	0	17	3	4	4	5	1	5	5	4	2	4	1	3	3	3	2	3	1	2	1	1	2	3	4	3	2		4	3	3	2	1	1	1	1	4	0	0	0	1	0	1	1	3	2
3	2	2	2	0	17													1	1	1	1	1																		5	0	0	1	0	0	0	0	0	0
5	2	2	2		17	5	4	3	1	4	3	2	1	2	5	3		5	3	4	2	1	2	1		3	4	4	3	2	4	3	4	3		5	2	4	3			0	1	0	0			0	0
1	1	1	1	0	20	3	5	5	5	5	5	5	3	3	1	2	1	5	5	3	5	5	4	4	4	4	4	4				4	4	4	4					5	0	0	1	1	1	0	1	1	0
3	1	1	1	0	16	4	3	2	4	3	3	5	2	1	2	3	2	4	5	3	3	4	4	4	4	4	4	4	3	4	4	4	4	4	3	1	1	1		2	1	0	1	0	1	1	0	0	0
3	1	1	1	1	16	3	3	4	3	2	3	4	4	3	5	3	4	2	4	3	2	2	3	3	3	3	3	2	1	2	3	2	1	2	3	3	2	3	4	3	0	0	0	0	0	0	0		0
4	1	1	1	1	16			4	4				2	3	3	1	2	2	4	4	2	3	3													1	2	1	1	3	0	1	1	1	0	1	0	0	0
3	1	1	1	1	16	3	4	2	5	3	2	4	3	3	3	3	3	2	4	3	2	3	3	3	3	3	3	2	3	2	3	2	3	2	3	3	3	3	3	1	0	0	0	0	0	0	0	0	0
3	1	1	1	0	16	3	4	3	3	3	4	4	4	4	2	4	4	3	5	4	3	4	4	3	4	4	4	4	3	3	4	4	4	4	3	1	1	1	1	4	1	1	1	1	0	1	1	0	0
3	1	1	1	0	16	2	3	3	3	3	4	4	4	4	2	4	1	4	5	4	3	4	4	2	4	3	3	4	4	4	3	3	3	4	4	1	1	1	1	5	1	1	1	1	1	1	1	1	0
3	1	1	1	1	17	2	4	3	3	2	4	5	1	1	1	1	1	5	5	4	4	5	4	4	3	4	3	4	4	4	4	3	4	2	1	1	1	1	1	4	0	1	0	1	0	0	0	0	0
3	1	1	1	1	16	3	3	5	5	5	5	5	5	5	4	3	1	1	4	4	1	1	4	4	3	3	3	4	3	3	3	3	3	4	2	1	1	1	1		0	1	1	0	0	0	0	0	0
4	2	2	2	1	17	3	4	3	4	3	2	5	2	1	1	1	1	3	4	4	3	4	4	3	3	3	4	4	3	3	3	2	3	2	2	1	1	1	2	4	0	1	0	1	0	1	0	0	0
7	1	1	1	1	17	3	4	2	3	2	4	5	3	1	1	1	3	4	5	5	4	5	4	4	4	4	4	4	4	3	2	4	4	4	3	1	3	1	5	5	1	1	0	1	1	1	1	0	0
3	1	2	1	1	16	3	3	3	3	3	3	3	4	4	4	4	4	3	5	5	3	3	4	4	4	4	4	3	3	3	3	3	3	3	3	3	3	3	3	4	0	0	0	0	0	0	0	0	0
4	1	1	1	1	16	5	2	3	4	2	1	3	2	3	5	4	1	4	3	4	4	1	2	3	4	2	2	3	2	4	3	3	3	1	4	4	3	4	2	5	1	0		0	1	0	1	3	0
4	1	1	1	1	16	3	3	3	3	3	3	5	3	3	3	3	3	1	5	2	1	2	4	4	4	4	4	3	4	4	4	3	4	4	2	1	2	1	1	5	0	1	0	1	0	1	1	0	0
3	1	1	1	0	16	2	4	4	5	5	5	5	3	3	2	1	2	5	5	3	4	3	4	3	4	3	4	4	3	3	4	4	4	4	3	2	2	1	1	1	0	0	0	1	1	1	1	1	0
9	1	1	1	0	16	3	3	4	4	4	3	3	3	2	2	3	3	4	4	4	4	3	4	4	4	4	4	3	3	3	3	4	4	4	1	1	1	1	1	5	1	0	1	1	0	0	0	0	0
3	1	1	1	1	16	3	3	3	3	3	3	5	4	2	4	1	1	4	3	4	2	1	4	2	3	3	3	3	2	2	3	3	4	4	4	1	1	1	1	3	0	0	0	0	0	0	0	0	0
3	1	2	1	0	16	1	4	5	5	5	5	4	4	1	1	1	1	3	5	2	4	3	4	2	3	2	3	4	4	3	3	3	3	3	2	1	1	1	1	3	0	0	1	1	0	0	1	3	0
3	1	1	1	0	16	2	3	2	3	4	4	4	4	2	1	1	2	4	4	3	3	4	4	4	3	4	4	4	4	4	4	4	4	4	3	1	1	1	1	4	1	1	1	1	0	0	1	0	0
3	1	1	1	0	16	2	1	2	4	3	3	2	3	2	2	1	2	3	4	3	4	3	4	3	4	4	4	4	3	4	4	4	4	4		1	1	1	1	4	0	1	0	0	0	0	1	0	0
3	1	1	1	1	16	3	4	3	2	3	4	4	3	3	2	1	1	4	4	4	4	4	4	4	4	4	4	4	4	4	4	4	4	4	4	1	1	1	1	5	1	1		1			0	0	0
3	1	1	1	0	16	1	1	1	1	1	1	1	3	3	2	1	1	4	4	3	4	3	3	3	4	4	3	4	4	4	4	4	4	4	3	1	1	1	1	4	1	0	0	0	0	0	0	0	0
3	1	1	1	1	16	5	3	3	3	3	3	4	2	2	2	1	1	2	4	5	3	3	4	4	4	4	4	4	4	4	4	4	4	4	4	1	1	1	1	5	0	1	0	1	0	0	0	0	0
3	1	1	1	0	16	4	3	3	4	5	2	3																												1							0	0	0
3	1	1	1	0	16	1	3	2	2	3	1	2	2	1	1	1	1	5	5	3	4	5	4	4	4	4	4	4	4	4	4	4	4	4	4	1	1	1	1	5	1	1	1	1	0	0	0	0	0
3	1	1	1	0	16	1	2	5	4	5	3	4	5	1	1	1	1	5	4	4	4	3	4	3	4	4	4	4	4	4	4	4	4	3	2	1	2	1	1	5	1	1	1	1	1	1	0	0	0
3	1	1	2	0	16								3	1	1	1	1	4	4	3	4	3	4	4	4	4	4	4	3	3	3			4	4	1	3	1	1	5	1	1	1	1	0	0	1	0	0
5	2	2	2	1	17													5	5	5	5	5	4	4	4	4	4													5	1	1	1	1	1	1	1	0	0
3	2	2	2		16	5	4	3	2	1		1	2	3	2	3	2	1	1	1	1	1	4	4	4	4	4									5	4	3	2	5	1	1	1	1	1	1	4	5	4
4	1	1	1	1	16	5	4	5	4	5	2	2	1	2	1	2		5	5	5	5	5	1	2	3	4	3	3	2	4	4	3	3	2	4	3	2	3	2	4	0	0	1	1	1	0	1	5	0
3	1	1	1	0	16		3	3	4	4			2	3	2	2	2	5	4	3	4	4	4	4	4	4	4	4	3	3	4	4	4	3	3					4	1	1	1	1	0	0	1	0	0
3	1	1	1	1	17	3	3	3	4	5	3	4	3	3	3	3	2	3	4	4	4	4	4	3	4	4	4	3	2	2	2	2	4	2	2	1	1	1	1	5	0	1	1	0	0	1	0	0	0
5	1	1	1	1	#NULL!	2	2	3	2	4	3	4	1	1	1	1	1	5	5	3	4	4	3	2	4	3	4	3	4	4	4	4	4	4	4	1	1	1	1	4	1	1	1	1	0	1	1	0	0
10	1	1	1	0	18	1	3	4	5	5	5	5	2	2	3	1	2	5	5	3	4	5	4	2	4	4	1	4	1	1	1	4	4	4	3	1	1	1	1	5	1	1	1	1	1	1	0	0	0
7	1	1	1	0	18	2	2	4	4	3	3	4	4	1	2	2	1	4	5	5	1	2	3	2	4	4	4	4	4	4	4	3	4	3	2	1	1	1	1	2	0	1	1	1		1	1	4	3
3	1	1	1	1	#NULL!																		4	3	4	3	4									1	1	1	1	1	0	0	0	0	0	1	1		0
3	1	2	2	0	17	3	4	3	4	4	4	4	5	5	5	5	5	4	4	5	3	4	4	2	4	4	4	3	3	3	3	3	3	1	1	1	1	1	1	4	0	0	0	0	0	0	2	3	0
3	1	1	1	0	17	5	5	5	5	5	5	5	5	5	1	1	1	5	5	5	5	5	4	4	4	4	4	4	4	4	4	4	4	4	4	1	1	1	1	3	0	0	0	1	0	0	0	0	0
3	1	1	1	1	17	3	4	3	3	2	4	4	2	1	2	1	1	5	4	3	4	4	4	4	3	3	4	4	2	2	2	4	4	4	4	4	5	4	1	4	1	0	0	1	0	0	2	1	1
3	1	1	1	1	17	5	5	4	2	2	5	5	3	1	2	1	3	3	4	4	3	3	3	4	4	4	3	4	4	4	4	3	4	2	1	5	1	5	5	5	1	0	0	1	0	1	0	1	1
5	2	2	2	0	16	3	4	3	4	3	3	3	3	2	2	3	2	3	5	3	4	3	4	4	4	4	4	4	3	3	3	2	3	2	2	2	2	2	2	4	0	1	1	1	0	1	1	2	0
2	1	1	1	0	20	2	2	5	4	5	3	5	2	1	1	1	1	1	3	2	3	3	4	4	4	4	4	3	1	1	1	3	3	4	4	1	1	1	1	3	0	0	0	1	0	0	1	0	0
1	1	1	1	0	17													3	4	4	2																			5							1	0	0
3	2	2	2	0	17																																			5		1	1	1	0	0		0	0
3	1	1	1	0	16	4	4	5	4	5	2	3	3	3	3	4	4	3	4	2	3	4	3	1	2	3	2	3	3	3	2	4	4	4	3	1	2	1	1	4	1	0	1	1	0	0	0	0	0
1	1	1	1	0	16	3	4	4	5	5	4	4	5	3	5	4	2	3	4	3	4	3	2	1	3			3	4	3	4	2	2	2	3	2	2	2	2	5	1	0	1	1	0	0	1	4	3
3	1	1	1	0	16	1	1	1	3	2	3	1	4	3	3	1	1	4	5	3	3	4	4	2	3	2	2	4	2	3	4	4	4	4	4	1	1	1	1	1	1	1	0	1	0	0	0	0	0
4	1	1	1	1	16	3	1	1	1	1	1	4	3	1	4	1	1	4	5	3	4	1	4	4	4	4	4	4	4	4	3	4	4	4	4	1	1	1	1	5	1	0	1	0	0	1	0	0	0
3	2	2	2	1	16	1	5	5	5	5	3	3	1	4	2	2	2	2	4	4	4	3	3	4	4	4	3	4	4	4	4	4	4	1	1	1	1	1	1	5	1	1	1	1	1	0	0	0	0
3	2	2	2	0	16	3	1	3	5	5	4	5	2	1	1	1	1	4	5	4	3	5	4	4	4	4	4	4	4	4	4	4	4	4	4	1	1	1	1	5	1	1	0	1	0	0	1	0	0
3	1	2	2	0	16	4	4	4	4	5	4	4	4	4	4	1	2	4	4	2	2	4	4	4	4	4	4	4	3	4	4	4	4	4	3	1	1	1	1	3	0	1	0	1	0	0	0	0	0
3	1	1	1	1	16	5	5	5	5	5	5	5	5	1	1	1	1	4	5	5	4	5	4	4	4	4	4	4	4	4	4	4	4	4	3	1	1	1	1	4	0	0	0	0	0	0	0	0	0
6	1	1	1	0	16	1	1	2	3	3	2	4	2	1	1	1	2	4	4	4	3	4	3	3	4	3	4	4	4	4	4	4	4	4	2	1	1	1	1	3	1	1	0	0	0	1	1	0	0
3	1	1	1	1	16	1	3	5	5	5	1	5	2	1	1	1	1	5	5	5	5	5	4	4	4	3	4	4	4	4	4	4	4	4	4	1	1	1	1	4	1	1	1	1	1	1	0	0	0
3	1	2	2	0	16	2	2	4	4	4	1	2	3	1	2	1	1	4	4	3	4	3	4	3	3	3	4	4	2	2	2	3	4	4	2	1	1	1	1	5	1	0	0	1	0	0	0	0	0
5	1	2	2	1	17	4	4	5	4	5	4	3	4	2	3	1	3	3	3	4	3	2	2	1	1	1	1	4				1	1	1	1	1	1	1	1	4	1	0	0	1	0	1	2	3	2
3	2	2	2	0	16		5	5	5	4	5	4	5	3	2	4	5	4	5	5	5						3	4	4	3	1	3	4	4	1					5	0	1		1	0		2	3	0
3	1	1	1	1	16	2	4	3	5	5	3	3	3	2	1	1	1	4	5	4	4	4	4	4	4	4	4	3	3	3	3	4	3	4	3	1	1	1	1	4	1	1	0	1	0	0	1	0	0
3	1	1	1	0	16	1	4	3	4	2	1	3	4	4	3	1	1	3	4		4	3	4	2	3	4	4	4	4	4	2	4	4	3	3	1	1	1	1	5	1	1	0	0	0	1	0	0	0
5	1	1	1	1	16	3	3	4	4	4	3	3	3	2	1	1	1	5	5	4	4	4	4	3	3	3	3	3	2	3	2	3	3	3	3	1	1	1	1	5	1	1	1	1	0	0	0	0	0
3	2	2	2	0	16	3	5	5	5	5	5	3	4	1	1	1	1	5	5	4	4	4	4	3	2	3	4	3	2	1	3			4		1	1	1	1	5	0	0	0	1	0	0	0	0	0
5	1	2	2	1	17	3	3	4	3	3	3	3	4	4	2	1	1	3	4	4	4	4	2	2	3	3	3	3								1	1	1	2		1	0	0	0	0	0	0	0	0
3	1	1	1	0	20								1	1	1	1	1	2	2	2	2	1	4	4	4	4	4	4	4	4	4	4	4	4	4	1	1	1	1	5							1	0	0
5	1	1	1	1	18	3	3	4	4	5	3	4	1	1	1	1	1	3	3	4	3	3	4	4	4	4	4	3	3	2	2	4	4	4	3	1	1	1	1	4	1	1	1	1	1	1	1	0	0
3	1	1	1	0	16	3	5	2	2	4	3	4	3	1	1	1	2	4	5	5	4	4	4	4	4	4	4	4	4	4	4	4	4	4	3	1	1	1	1	4	1	0	0	1	0	0	0	0	0
4	2	2	2	0	16	1	1	4	3	4	2	2	5	3	2	2	2	3	4	4	4	4	4	3	4	3	3	2	3	3	3	4	4	4	3	1	1	1	1	4	1	1	1	0	0	1	0	0	0
3	1	1	1	0	16								4	2		2	3	4	4	3	3	3	4	2	3	4	4	4								2	2	2	2	3	0	0	1	1	0	0	0	0	0
5	1	2	2	0	16	3	3	3	3	3	3	3	1	1	1	5	1	1	3	3	3	1	2	1	3	2	2	4	4	4						1	1	1	1	4	1	1	1	1	0	0	0	0	0
3	1	1	1	1	16	2	4	3	4	4	4	4	4	3	5	2	3	4	4	3	2	3	4	2	2	3	3	3	3	4	3	4	2	4	4	1	2	2	2	4	0	1	1	1	0	1	1	0	0
5	1	2	2	0	16	4	4	5	5	5	4	5	5	2	2	1	3	4	1	1	1	3	3	1	3	2	1	3	3	3	3	2	3	4	1	1	1	1	1	1	0	0	0	1	0	0	2	1	4
5	2	2	2	0	17	5	5	5	5	5	5	5	2	2	1	2		4	4			4	2	1	1	1	1	3			1	3	1	1		1	1	1	1	2	0	0	0	0	0	0	0	0	0
3	1	1	1	1	17	3	4	2	4	4	4	3	1	3	3	1	1	3	5	3	4	3	4	3	4	4	4	4	3	3	2	4	4	4	4	1	1	1	1	5	1	1	0	0	0	0	1	0	0
3	2	2	2	1	17	3	4	4	4	4	3	4	3	2	2	2	1	4	4	4	2	3	3	3	4	3	3	3	4	4	4	4	4	2	2	1	1	1	1	5	1	1	0	0	0	0	1	0	0
3	1	1	2	1	16	5	5	5	2	5	2	5	2	1	1	1	1	5	5	5	4	4	4	3	3	4	4	3	3	3	3	4	4	4	4	1	1	1	1	5	1	1	1	1	0	1	0	0	0
5	1	1	1	0	16	3	3	3	3	3	3	3	4	2	3	3	2	3	3	3	3	3	3	1	4	3	3	4	3	3	3		4	3	3	1	1	1	1	4							0	0	0
3	2	2	2	0	16													4	4	4	4	4	4	4	4	4	4	3	3	3	3	3	3	3	3	1	1	1	1		1	1	1	1	1	1	0	0	0
3	1	1	1	1	16	2	4	3	3	4	1	2	4	3	1	1	3	4	5	4	5	5	4	2	3	3	3	4	3	3	3	4	4	4	4	1	1	1	1	4	1	1	1	1	0	1	1	0	0
3	2	2	2	0	16	1	2	4	3	3	3	3	4	5	3	4	2	5	3	4	4	3			3	3		4	4	4	4			4	3	1	1	1	1	4	1	1	0	1	0	0	0	0	0
3	1	1	1	1	16	3	3	3	3	3	4	4	1	1	1	1	1	5	4	3	3	3	4	3	4	4	4	4	3	4	4	4	4	4	3	3	3	3	3	3	1	0	0	0	0	0	0	0	0
1	1	1	2	1	16	5	5	5	5	5	5	5	3	3	3	3	3	3	3	4	4	4	4	4	4	4	4	3	3	3	3	4	3	4	3	1	1	1	1	4	1	0	1	1	1	1		1	0
3	1	1	1	1	17	1	1	2	1	3	1	2	3	1	2	1	1	4	4	3	4	4	4	4	4	4	4	4	4	4	4	3	3	3	3	3	3	5	3	4	1	1	1	1	0	0	2	1	0
5	1	1	1	0	20	3	1	3	3	3	3	3	2	4	1	1	1	4	5	3	3	5	4	4	4	4	4	4	4	4	4	4	4	4	3	1	1	1	1	2	1	1	0	1	0	0	0	0	0
8	1	2	1	1	19	4	5	4	4	5	5	5	2	1	1	1	1	4	5	5	4	4	4	3	3	3	3	4	4	4	3	4	4	4	3	1	1	1	1	5	1	1	1	1	1	1	1	3	0
3	1	1	1	0	17	3	4	4	4	4	3	4	3	2	1	2	2	4	5	4	4	5	4	4	4	4	4	4	3	3	3	4	4	4	4	1	1	1	1	4	1	1	1	1	0	0	0	0	0
5	1	1	1	1	18	5	5	4	2	4	5	5	3	2	2	1	2	3	5	3	2	3	4	3	2	4	4	3	4	4	2	3	4	3	3	1	2	1	1	5	1	1	0	1	0	1	2	4	2
4	1	1	1	0	17	3	4	3	3	4	4	4	3	2	1	2	3	4	5	4	3	5	4	4	4	4	4	4	4	4	4	4	4	4	4	1	1	1	1	5	1	1	0	1	0	1	1	0	0
9	1	1	1	0	20	4	4	3	3	5	3	3	3	2	2	1	2	2	4	1	4	2	2	2	2	2	2	3	3	3	3	3	3	3	3	1	1	1	1	5	0	0	0	1	1	0	0	0	0
3	1	1	2	0	17	4	5	5	5	5	5	5	3	3	3	3	3	4	5	5	4	4	4	2	3	2	3	4	3	3	4	2	3	4	4	1	1	1	1	5	1	1	1	1	1	1	1	0	0
5	1	1	1	1	18	3	4	4	3	2	3	4	4	3	1	1	1	4	4	5	4	3	4	3	2	3	3	4	3	3	2	4	4	4	4	2	2	3	3	5	0	0	0	1	0	1	1	0	0
3	1	2	2	1	18	4	3	5	4	4	5	5	5	2	3	4	4	3	1	3	2	2	4	3	4	3	4	3	1	1	1	3	2	4	2	1	2	5	3	3	1	1		1	0	1	0	0	2
3	1	1	1	1	16	3	2	4	5	5	4	3	3	1	1	1	1	5	3	5	5	4	4	3	3	3	4	4	4	4	4	4	4	3	2	1	1	1	1	5	1	1	1	0	0	0	0	0	0
3	2	2	2	1	17	4	5	5	5	5	5	5	1	1	1	1	1	3	4	3	4	3	3	1	3	2	3	3	4	4	4	4	4	4	1	1	1	1	1	5	1	1	1	1	1	1	0	0	0
4	1	1	1	1	17	4	2	4	4	4	4	4	5	1	2	1	3	4	5	4	3	3	4	4	4	4	4	3	3	2	3	1	4	1	1	1	2	1	1	4	0	1	1	1	0	1	1	0	0
3	1	1	1	0	17	3	4	4	4	4	4	4	4	3	2	3	2	2	4	2	2	3	3	3	4	4	4	3	4	4	4	4	4	4	4	1	1	1	1	4	1	1	0	1	1	1	1	0	0
5	1	1	1	0	20	2	2	3	4	4	4	4	3	1	1	1	1	3	4	3	3	2	2	1	2	2	2	2	2	2	1	2	2	1	1	1	1	1	1	5	1	1	1	1	0	1	0	0	0
5	1	2	2	0	18	5	5	5	5	5	5	5	4	4	2	1	1	3	4	4	3	4	4	3	3	2	3	4	4	3	4	4	4	3	2	1	1	1	1	4	1	0	1	1	0	0	1	0	0
3	1	1	1	0	17	2	3	3	3	3	3	3	3	3	3	2	1	5	5	4	4	3	4	3	4	4	4	4	3	3	3	4	4	4	3	2	2	2	2	4	1	1	1	0	0	0	1	0	0
3	1	1	1	1	17	3	4	4	4	4	4	3	3	1	1	1	1	3	5	4	3	2	4	2	3	3	4	4	3	3	2	1	2	3	1	2	2	2	2	5	0	0	0	1	0	1	1	1	0
3	1	1	1	0	17	4	3	5	5	4	4	5	3	1	1	1	1	4	4	4	2	3	3	3	4	4	4	4	4	4	4	4	4	3	1	1	1	1	1	3	0	1	0	0	0	0	0	0	0
1	1	1	1	0	17	3	3	4	4	5	5	3	5	5	5	5	5	4	4	4	4	3	3	2	2	2	2	3	4	4	4	4	4	4	1	1	1	1	1	4	1	1	0	1	0	0	1	5	0
3	1	1	1	0	17	2	2	4	4	2	3	3	3	1	1	1	1	3	4	3	3	2	4	4	4	4	4	4	4	4	4	4	4	4	3	1	1	1	1	5	1	1	1	1	0	0	1	0	0
3	1	2	1	0	17	2	2	2	3	4	4	5	3	3	2	1	1	3	4	5	5	5	4	3	4	4	4	4	3	3	3	4	4	4	4	1	1	1	1	4	1	1	1	1	0	1	0	0	0
3	1	1	1	1	17	3	3	3	3	3	3	3	1	1	2	1	1	5	5	5	5	5	1	3	1	2	2	4	4	4	4	3	3	3	4	1	1	1	1	5	0	1	0	1	0	0	0	0	0
3	2	2	2	0	17	3	3	3	5	5	5	5	2	2	1	1	1	5	5	4	4	4	4		4	4	4	4	4	3	3	3	3	4	3	1	1	1	1	4	1	1	0	1	0	1	0	0	0
3	1	1	1	0	16	3	5	3			5	4	3	2	1	3	2	1	4	4	2	3	2	1	4	1	2	3	3	3	2	2	3	3		1	2	1	1	4	0	1	1	1	0	1	1	0	0
3	1	1	1	0	16	4	3	4	5	5	5	5	5	2	1	3	1	4	5	4	4	4	4	4	4	4	4	4	3	4	2	4	4	4	3	1	1	1	2	4	1	1	1	1	0	1	1	0	0
3	1	1	1	0	14	1	2	3	5	4	4	4	3	2	2	1	2	4	5	1	5	4	4	4	4	4	4	4	3	3	3	4	4	4	4	1	1	1	1	4	1	1	0	0	0	0	0	0	0
3	1	1	1	0	18	4	4	4	4	4	4	4	5	5	5	5	5	4	4	2	4	3	1	1	1	1	1	4	4	4	4	2	3	2	2	1	1	1	2	4	1	0	1	0	0	0	0	0	0
5	1	9	9	1	20	3	2	1	5	5	3	5	4	3	4	3	3	3	2	2	2	3	2	1	1	1	3	4	1	1	1	1	2	3	2	1	1	1	1	5	1	1	0	0	0	0	1	1	0
9	1	1	1	0	18	3	3	4	4	4	4	4	3	3	2	3	2	4	4	2	4	4	3	2	2	2	3	4	3		2	3	2	3		1	1	1	1	5	1	0	1	0	0	0	1	0	0
3	1	1	1	0	17	1	5	3	4	2	5	5	4	3	3	3	2	4	4	3	4	4	4	4	4	4	4	4	3	3	3	3	3	3	2	2	3	1	2	5	1	1	1	1	1	1	1	1	0
3	1	1	1	0	17	3	4	4	4	5	5	5	4	5	4	3	1	3	4	3	3	2	3	3	2	1	1	4	4	4	3	3	3	3	2	1	1	1	1	5	1	0	1	1	0	0	1	0	0
3	1	1	1	0	19	3	5	3	3	3	3	4	5	3	3	2	4	2	4	4	3	3	4	4	4	4	4	4	3	2	1	4	4	4	4	1	1	1	1	5	1	1	0	1	0	0	2	1	0
3	2	2	2	1	18	3	2	2	3	2	2	3	4	3	4	3	4	4	3	3	3	3	3	3	3	3	3	2	3	1	2	1	1	1	1	1	3	2	2	4	0	0	0	0	0	0	0	0	0
3	1	1	1	1	14	2	1	3	3	4	3	3	3	2	1	2	3	2	5	3	2	3	4	4	4	3	4	3	4	2	4	3	4	3	2	1	1	1	1	5	1	1	0	1	1	0	1	0	0
3	2	2	2	0	14	3	3	4	4	4		4	4	3	2	1	1	3	4	4	3	3	3	2	3	3	3	3	3	2	3	4	4	4	4	1	1	1	1		0	0	0	0	0	0	0	0	0
3	1	1	1		14	3	2	3	3	3	3	3	2	1	1	1	1	4	4	4	1	5	4	2	3	3	4	4	3	3	1	4	3	4	3	1	1	1	1	4	1	0	0	0	0	0	0	0	0
3	1	1	1	0	14	1	3	2	2	2	1	1	4	3	1	3	1	4	5	4	3	3	4	4	4	4	4	4	3	3	3	4	4	4	4	1	1	1	1	4	1	1	0	0	0	0	1	0	0
3	1	1	1	0	14													5	5	4	4	4	3	2	4	1	4																				0		0
3	1	1	1	0	14	1	2	2	3	4	2	2	4	3	2	1	2	4	5	2	5	3	4	3	4	3	4	4	3	3	3	4	4	4	4	1	1	1	1	4	1	0	1	0	0	1	0	0	0
3	1	1	1		14	2	1	3	3	4	1	4	5	5	5	1	2	2	2	1	1	1	3	2	4	2	3	4	3	4	4	4	4	3	3	1	1	1	1	4	1	1	1	0	0	0	0	0	0
5	1	2	1	0	14	5	4	4	3	4	5	5	3	1	1	4	5	3	4	1	2	3	4	4	4	4	4	4	1	3	1	4	4	4	2	1	1	1	1	5	0	1	0	1	0	0	0	0	0
1	1	2	1	1	14	5	5	5	5	5	5	5	1	1	1	1	1	4	5	3	4	3	4	3	4	4	4	4	4	4	4	4	3	4	4	5	3	4	1	5	0	1	0	1	0	0	0	0	0
3	1	1	1	0	14	3	3	4	4	4	3	3	4	2	2	2	2	4	5	5	4	4	4	3	4	4	3	3	2	2	2	3	3	4	3	1	1	1	1		0	1	1	0	1	0	0	0	0
3	1	1	1	1	14	2	4	5	4	5	5	5	3	2	4	1	1	4	5	3	3	3	4	2	3	3	3	4	3	4	3	4	4	4	3	1	1	1	1	5	1	0	1	0	0	1	0	0	0
3	1	1	1	1	15	1	5	3	3	3	3	3	2	1	1	1	1	3	3	3	4	4	4	3	3	3	4	4	4	3	4	4	4	3	3	1	1	1	1	5	1	1	1	1	0	1	0	0	0
1	9	9	9		13
1	9	9	9		14
4	1	1	1	1	18	3	4	4	3	3	3	4	3	1	1	2	1	3	3	2	4	3	3	1	1	3	3	4	4	4	3	3	4	3	1	1	1	1	1	4	1	1	1	1	0	1	0	0	0
3	1	1	1	1	20	2	4	3	5	5	3	5	3	1	1	1	1	3	2	5	2	3	4	3	3	3	3	4	3	3	3	3	3	3	3	1	1	1	1	5	0	0	0	1	0	0	0	1	1
3	1	1	1	0	15	3	4	4	4	4	4	4	4	4	4	2	4	4	5	3	3	3	4	2	3	3	4	3	3	2	1	2	2	2	2	2	2	2	2	2	0	0	0	0	0	1	2	2
3	2	1	1	1	13		5				3	3	2	3	1	2	2	4	1	4	4	2	2		3	1	4	3	3	3	3			2	3	1	1	1	1	3		1					0	0	0
3	1	1	1	1	15	3	3	2	3	4	4	4	2	2	4	2	2	4	5	5	4	4	4	3	4	4	4	4	3	3	3	3	3	3	3	1	2	1	1	3	1	1	0	0	1	1	0	0	0
3	1	1	1		15	3	3	3	3	3	3	3	5	5	5	1	1	3	4	4	2	3	3	1		1														5	0	1	0	1	0	0	1	0	0
3	1	1	1	1	15	2	4	2	4	3	4	4	1	2	3	2	2	3	5	4	3	4	4	3	4	4	4	3	3	3	3	4	4	3	4	1	1	1	1	4	1	1	1	1	1	1	0	0	0
3	1	1	1	1	#NULL!	3	4	2	2	2	3	4	2	1	2	1	1	4	5	5	5	5	4	4	4	4	4	4	3	3	2	2	2	3	2	2	2	2	2	5	1	0	1	1	0	1	0	0	0
3	2	1	1	0	15		4	3	4	2	3	3	1	1	1	1	1	3	4	4	3	3	4	4	3	4	4	4	4	4	3	4	4	4	3	1	1	1	1	4	1	1	0	1	0	0	0	0	0
3	1	1	1	0	15	2	2	3	3	2	3	3	1	1	1	1	1	3	5	5	4	5	4	4	4	4	4	4	4	4	4	4	4	4	4	1	1	1	1	3	1	1	0	0	0	0	0	0	0
3	1	1	1	1	16	3	4	5	5	5	5	3	2	5	3	3	2	4	5	5	5	5	4	4	4	4	4	4	3	2	4	4	4	4	3	1	1	1	1	5	1	1	1	0	1	1	0	0	0
3	1	1	1	0	15	4	4	4	4	4	4	4	3	2	2	3	2	3	5	3	2	2	3	2	4	3		4	4	4	3	3	4	3	3	1	1	1	1	3	1	0	0	1	0	1	0	0	0
3	1	1	1	1	15	2	3	5	4	4	3	5	4	4	4	4	2	3	3	2	3	4	3	3	3	3	4	4	3	3	3	4	4	4	3	1	1	5	5	4	1	1	1	0	0	0	0	0	0
3	1	2	2	0	15	3	3	3	3	3	3	3	2	1	1	1	1	3	1	4	1	1	4	4	4	4	4	4	1	1	1	4	4	4	4	1	1	1	1	5	1	1	1	1	0	0	0	0	0
3	1	1	1	0	15	4	4	4	4	4	4	4	4	1	1	3	4	3	5	4	2	2	4	2	4	3	2	4	4	4	3	4	4	3	3	1	1	1	1	3	0	0	0	1	0	1	0	0	0
3	1	1	1	0	15	3	3	4	3	4	3	3	2	1	1	1	1	3	4	4	4	3	4	4	4	4	4	4	4	4	4	3	4	4	3	1	1	1	1	3	1	1	0	0	1	1	0	0	0
3	1	1	1	0	15	2	4	3	3	4	5	4	3	2	1	1	1	3	4	3	3	3	4	4	4	4	4	3	3	3	3	4	4	4	3	1	1	1	1	5	1	1	0	1	0	0	0	0	0
3	1	1	1	0	15	4	4	4	4	4	4	5	4	3	2	1	1	4	4	4	3	2	4	4	4	4	4	4	3	2	2	3	3	3	3	1	1	1	1	4	0	1	0	1	0	0	0	0	0
3	1	1	1	1	15	3	1	3	3	5	4	4	4	3	2	1	4	3	4	3	2	2	4	1	3	2	2	4	4	4	4	2	4	4	4	1	1	1	1	3	1	0	0	1	1	0	1	0	0
5	1	1	1	1	15	3	1	1	5	5	4	3	4	4	3	4	1	5	5	4	5	3	4	4	4	4	4	4	3	3	3	3	4	4	4	1	1	1	1	5	0	1	0	1	0	0	0	0	0
3	1	1	1	0	15	3	4	4	3	3	3	3	1	1	1	1	1	3	5	5	4	5	4	4	4	4	4	4	4	4	4	4	4	4	4	1	1	1	1	4	1	1	1	0	0	1	0	0	0
3	1	1	1	1	15	4	4	3	4	5	3	5	3	4	3	2	1	4	3	2	4	2	4	2	3	3	1	3	2	1	3			4	1	2	2	2	1	5	1	1	1	1	1	0	0	0	0
3	1	1	1	0	15	2	3	4	3	4	4	4	3	3	2	3	3	4	5	3	4	4	4	4	4	3	4	4	3	3		3	3	4	3	1	1	1	1	4	1	1	1	0	1	1	0	0	0
3	1	1	1	1	15	1	1	1	1	1	1	1	3	1	1	2	1	5	5	4	5	5	4	1	4	2	4	4	4	4	4	4	4	4	4	1	1	1	1	4	1	1	1	0	0	0	0	0	0
3	1	1	1	0	15	4	4	4	4	4	3	3	3	2	1	2	2	3	4	4	3	2	4	4	4	4	4	4	4	4	3	4	4	3	2	1	1	1	1	3	1	1	0	1	1	0	0	0	0
3	1	1	1	1	15	2	4	3	5	4	2	2	1	1	1	1	1	3	4	5	3	4	4	3	3	3	4	4	3	3	3	4	4	4	4	1	1	1	1	5	1	1	1	1	1	1	0	0	0
3	1	1	1	1	15								5	2	2	1	2	3	5	4	5	3	4	2	3	3	3	3	3	3	2	2	2	4	3	1	1	1	1								0	0	0
3	1	1	1	1	15	3	4	3	4	4	4	5	3	3	2	2	2	5	5	4	4	2	3	4	4	4	4	4	3	3	3	3	4	3	3	1	1	1	1	4	1	1	0	1	0	0	0	0	0
3	2	2	2	1	15	3	3	1	2	5	5	5	2	1	2	1	1	5	5	4	3	4	4	3	3	3	3	4	4	4	4	3	4	4	4	1	1	1	2	4	1	1	0	0	1	1	0	0	0
3	1	1	1	0	16	3	4	3	3	5	5	3	5	4	3	4	4	4	5	5	3	3	3	2	4	3	3	4	3	3	2	4	4	4	3	1	1	1	1	5	1	1	1	1	1	1	0	0	0
5	1	1	1	0	16	4	3	2	2	4	5	5	2	2	1	1	1	5	5	5	3	2	4	2	2	1	3	4	2	4	4	4	4	4	2	1	1	1	1	3	1	0	0	1	0	1	0	0	0
3	1	1	1	0	16	3	3	3	4	4	2	4	3	3	3	1	2	3	5	4	3	2	4	4	4	4	4	3	4	4	4	4	4	4	3	1	2	1	2	5	1	1	1	0	0	1	0	0	0
3	1	2	2	0	16	3	4	3	4	5	5		5	4	2	1	2	3	4	3	2	1	2	2	4	2		3	4	4	4	4	4	4	3	1	1	1	1	5	0	0	0	1	0	0	1	4	0
3	1	1	1	0	15			4	2	4		4	3	3	3	1	2	4	4	4	3	4		2	2	2		4	3	3	3	4	4	4	4	1	1	1	1	4	1	1	1	0	0	1	0	0	0
5	1	1	2	1	16	3	2	4	4	5	5	5	1	1	1	1	1	4	5	5		4	4	4	4	4	4	4	4	4	4	4	4	4	4	1	1	1	1	4	1	1	1	1	1	1	0	0	0
3	1	2	2	1	16	5	5	5	5	5	3	5	4	5	5	2	4	5	5	4	4	4	4	4	4	4	4	4	1	2	1	4	4	2	4	1	1	1	1	5	1	0	0	1	0	0	1	0	0
9	1	2	2	0	16	5	5	5	5	5	5	5	5	5	5	5	5	5	3	3	4	2						4	4	2	2	1	1	1	1	1	1	1	1	5	1	1	1	0	0	1	0	5	4
3	1	1	1	1	16	5	5	5	5	5	3	3	2	2	1	1	1	3	3	2	4	3	4	3	4	3	4	4	4	4	3	4	4	4	3	1	1	1	1	4	1	1	0	0	0	0	1	0	0
4	2	2	1	1	16	5	5	5	3	5	5	5	1	2	1	1	1	3	4	2	3	4	4	4	2	3	4	2	3	4	4	4	4	3	3	1	1	1	1	5	1	1	1	0	0		0	0	0
3	1	1	1	1	16	1	1	2	3	4	2	4	1	1	1	1	1	5	5	4	4	5	4	4	4	3	2	4	4	3	3	4	4	4	4	1	1	1	1	5	1	1	1	1	0	0	0	0	0
3	1	1	1	0	16	3	3	4	4	4	4	5	3	1	1	1	2	5	5	5	4	5	4	4	4	4	4	4	4	4	3	3	3	4	3	1	1	1	1	5	1	1	1	1	0	1	1	0	0
3	1	1	1	0	#NULL!	3	3	4	4	4	3	5	2	2	1	1	1	5	5	5	4	5	4	3	4	4	4	4	4	4	3	3	3	4	3	1	1	1	1	5	1	1	0	1	0	1	1	0	0
3	1	1	1	1	16	2	3	4	4	5	3	4	4	4	4	4	4	3	5	5	3	4	4	3	4	3	4	3	3	3	3	4	4	4	4	1	1	1	1	5	1	1	1	1	1	1	0	0	0
3	1	1	1	1	16	3	4	1	2	2	1	5	1	2	2	2	4	3	5	5	5	3	4	3	4	4	4	4	3	3	3	2	3	4	2	1	1	1	1	3	1	0	0	1	1	1	1	0	0
3	1	1	1	1	16	3	3	3	4	4	3	4	3	2	2	2	2	4	4	4	3	2	4	4	4	4	4	3	3	2	3	2	3	3	2	1	1	1	1	4	1	1	0	0	0	0	0	0	0
3	1	1	1	1	16	3	2	4	4	5	3	5	2	3	1	1	1	2	1	1	1	1	4	4	4	3		3		3		4	4	4	3	1	1	1	1	5	0	1	0	0	0	0	0	0	0
5	1	1	1	0	#NULL!	1	4	1	5	5	1	5	3	1	3	1	1	4	5	5	4	1	4	4	4	4	4	4	4	4	4	4	4	4	4	1	1	1	1	5	1	0	1	1	0	0	0	0	0
3	2	2	2	1	16	1	2	1	1	1	4	4	1	3	2	1	2	4	5	5	4	5	4	4	4	4	4	4	4	4	4	4	4	4	3	1	1	1	1	4	1	1	0	0	0	0	0	0	0
3	1	1	1	0	16	3	1	1	1	1	3	4	3	3	3	2	3	4	4	4	4	3	4	4	4	4	4	4	4	4	4	4	4	4	3	1	1	1	1	5	1	1	1	1	0	0	0	0	0
4	2	1	2		17	5	1	5	5	5	5	5	5	5	5	5	5	5	5	5	5	1	1	1	2	1	4	3	3	3	3	3	3	3	3	1	1	1	1	5							1	3	0
5	2	2	2	1	#NULL!	3	3			5	5	5	3	1	1	1	2	3	4	2	4	3	4	4	3	3	4	4	3	3	2	3	4	2	1	1	1	1	1	5	1	1	1	1	0	1	0	0	0
6	1	2	2	0	17	4	3	3	5	5	5	3	5	5	5			4	5	5	3	1	4	2	2	1	4	3	4	4	4	4	4	4	3	2	1		2	5	1	1	1	0	0	1	1	0	0
3	1	1	2	0	16	3	3	4	5	5	4	5	3	1	1	1	1	5	4	3	3		4		4	3	4	4	4	3	3	4	4	4	4	1	1	1	1	4	1	1	1	0	0	0	1	0	0
4	2	2	2	0	17	3	3	3	3	4	3	3	5	4	2	4	2	3	3	3	3	3	3	1	4	4	4	4	3	3	3	3	3	3	3	1	1	1	1	3	0	0	1	0	0	0	0	0	0
5	1	2	2	1	16	1	3	3	5	5	5	5	1	1	1	1	2	4	5	5	4	3	3	3	4	3	4	4	1	1	1	3	1	1	1	1	1	1	1	5	1	0	0	0	0	0	0	0	0
3	1	1	1	0	17	4	3	3	2	1	2	4	3	1	1	1	1	4	5	4	4	3	4	3	4	4	4	4	4	4	3	4	4	4	3	1	1	1	1	5	1	1	1	0	1	0	1	0	0
3	1	1	1	0	16	5	4	5	4	5	4	5	4		1	3	2	4	5		4	2	4	3	4	3	4	4	4	3	2	3	3	4	2	3	4	1		5	1	1	0	1	1	0	1	5	0
4	1	2	2	0	16	4	4	3	4	3	3	3	4	4	3	2	3	3	5	2	4	3	3	2	3	1	3	4	3	3	1	3	3	3	3	1	1	1	1	3	0	1	0	1	1	1	0	0	0
4	1	2	1	1	17	1	1	3	2	4	3	4	2	1	1	1	1	5	5	4	5	4	4	4	4	4	4	4	4	4	3	3	3	3	2	1	2	1	1	5	1	1	1	1	0	1	0	0	0
5	1	9	2	1	16	4	3	5	5	5	1	5	1	1	1	1	1	5	5	3	5	4	4	1	4	2	3	4	4	4	4	4	4	4	3	1	1	1	1	3	1	1	1	1		1	0	0	0
8	1	1	1	0	17	1	5	1	5	1	1	1	1	1	1	1	1	4	4	4	4	4	4	4	4	4	4	3	3	3	3	4	3	4	4	1	1	1	1	5	1	0	0	0	0	0	0	0	0
5	1	1	1	1	16	4	4	4	4	3	4	4	3	3	2	3	2	5	5	4	5	5	4	4	4	4	4	4	3	2	3	4	3	4	3	2	2	2	2	4	1	0	0	1	0	1	1	4	0
3	1	1	1	0	16	2	3		3	4	3	3	2	2	1	1	1	4	5	3	4	3	4	4	4	4	4	4	4	4	4	4	4	4	3	1	1	1	1	3	1	1	1	1	1	1	0	0	0
1	1	1	1	1	13	3	5	4	5	5	4	4	1	1	5	1	1	5	5	4	4	4	4	2	4	4	4	4	4	2	4	4	4	4	2	1	1	1	1	5	0	1	1	1	0	1	0	0	0
4	1	1	1	1	#NULL!	2	3	3	3	4	4	4	4	2	4	1	3	3	4	3	3	3	3	3	3	3	3	3	3	3	3	3	3	3	3	1	1	1	1	4	1	0	1	1	0	1	0	0	0
3	1	1	1	0	17	1	1	5	5	5	1	1	3	3	2	3	3	5	3	2	5	5	2	1	1	1	3	4	4	4	4			4		1	1	1	1	5	1		1	0	0	0	1	3	0
3	1	1	1	0	16	5	5	4	5	5	5	5	3	2	1	1	3	4	5	3	3	3	4	4	4	4	4	4	3	3	3	4	4	4	4	1	1	1	1	4	1	1	1	1	0	1	1	0	0
3	1	1	1	0	16	4	5	5	5	5	5	5	3	1	2	1	3	4	5	3	3	3	4	4	4	4	4	4	3	4	3	4	4	4	4	1	1	1	1	3	1	1	1	1	1	1	1	0	0
3	1	2	2	0	17		3	3	4	4	4	5	5	4	4	4	4	5	5	3	5	3	3	1	2	2	1	3	4	4	4			2	1	1	1	1	2	3	1	0	1	1	0	1	0	0	0
3	1	1	1	1	16	2	1	1	3	1	3	5	4	1	2	2	1	4	5	3	3	1	3	2	4	4	3	4	4	4	4	4	4	4	2	1	1	1	1	3	0	0	0	0	0	0	0	0	0
3	1	2	2	1	16	2	1	2	4	4	1	1	3	2	2	1	1	3	3	3	4	3	3	2	4	3	3	4	3	2	2	4	4	3	3	1	1	1	1	5	1	1	1	0	0	0	0	0	0
3	1	1	1	1	16	4	4	5	5	5	4	4	5	4	4	1	4	3	4	3	2	4	3	2	4	2	3	3	3	2	4	4	4	4	3	1	1	1	1	4	1	0	0	0	0	0	0	0	0
3	1	1	1	1	16	3	5	4	3	3	3	3	4	4	2	2	1	5	5	4	5	4	4	2	4	3	4	3	4	3	4	4	4	4	3	1	1	1	1	4	0	1	0	1	0	0	0	0	0
5	1	1	2	0	17	4	4	4	4	5	5	5	4	4	3	3	3	3	4		2	2		2	3	3	4	4	3	2	3	4	4	4	3	1	1	1	1	5	1	1	1	1	1	1	1	0	1
8	1	1	1	1	17	5	3	3	4	5	5	5	3	2	4	1	3	3	5	4	3	5	4	4	4	4	4	4	4	4	4	4	4	4	2	1	1	1	1	5	1	1	0	0	0	1	0	2	0
3	1	1	1	0	17	3	2	2	2	4	3	4	3	1	1	1	1	5	5	5	5	5	4	4	4	4	4	4	3	3	4	4	4	4	3	1	1	1	1	5	1	1	1	1	0	1	1	0	0
5	1	2	2	1	17	2	3	3	4	4	3	3	4	3	4	2	2	3	4	4	3	4	4	2	3	4	3	3	1	2	1			3	2	1	1	1	1	4	1	1	0	1	0	0	0	0	0
3	1	1	2	1	17	3	3	4	4	4	4	4	4	4	5	1	3	3	5	4	3	3	4	2	3	3	4	4	4	4	4	3	4	3	1	1	1	1	1	3	0	0	1	1	0	0	1	0	0
5	2	2	2	0	17	2	4	5	4	5	3	4	3	4	4	2	1	4	4	4	2	1	3	1	1	2	2	4	3	4	1	4	3	3	2	1	1	1	1	5	1	0	1	1	0	1	0	0	0
3	1	1	1	1	17	2	2	2	5	5	4	4	2	1	1	1	2	5	5	5	4	3	4	4	3	3	4	4	3	4	3	4	4	4	1	1	1	1	1	5	1	0	0	0	0	0	0	0	0
3	1	1	1	1	17	3	4	4	3	5	4	3	4	4	1	1	1	5	5	5	5	5	4	4	3	3	4	4	4	3	3	3	3	4	4	1	1	1	1	5	1	1	1	1	1	1	4	0	2
3	1	1	1	0	17	5	3	4	4	3	4	2	4	2	2	1	3	5	5	4	4	5	4	3	3	4	4	4	2	2	2	4	3	4	1	1	1	1	1	4	1	1	0	1	1	1	1	0	0
3	1	1	1	0	17	3	3	4	4		3	3	4	4	4	3	2	4	5	4	3	2	4	4	4	4	4	4	4	4	3	4	4	4	3	1	1	1	1	5	1	1	1	1	1	1	0	0	0
3	1	1	1	0	17	2	3	4	3	5	3	3	4	4	5	3	5	4	5	4	4	3	4	2	3	3	3	4	4	3	3	4	4	4	3	1	1	1	1	5	1	1	1	1	0	1	1	0	0
3	1	1	1	1	17	2	3	5	5	3	3	4	3	3	1	1	2	3	3	4	2	3	3	2	3	3	3	3	4	4	4	4	4	3	2	1	1	1	1	3	0	0	0	1	0	1	1	0	0
3	1	1	1	1	17	1	1	2	1	1	1	5	1	1	1	1	1	5	5	5	4	5	4	4	4	4	4	2	1	1	3	3	3	3	1	1	1	1	1	5	1	1	1	1	0	1	0	0	0
3	1	1	1	1	17	4	4	4	4	3	4	5	4	2	1	1	2	4	5	5	3	3	4	4	4	4	4	4	4		3	4	4	4	3	1	1	1	1	5	1	1	1	1	0	0	1	0	0
3	1	1	1	1	17	3	3	3	3	3	3	3	5	2	2	2	2	3	5	5	3	3	4	4	4	4	4	4	3	3	3	3	3	3	3	1	1	1	1	4	0	1	1	1	1	1	1	0	0
3	1	1	1	0	17	3	4	4	3	4	3	3	4	3	3	2	4	4	5	4	4	3	4	4	3	3	3	4	3	3	3	3	4	4	4	1	1	1	1	4	1	1	0	1	1	0	1	0	0
3	1	1	1	0	17	5	4	5	4	4	4	3	5	5	5	1	2	4	5	3	3	3	4	1	4	4	3	4	4	4	2	1	1	4	4	1	1	1	1	5	1	0	0	1	0	0	1	0	0
9	1	2	1	0	17	2	4	5	5	5	4	2	5	5	5	2	3	3	3	4	3	5	4	4	4	4	4	4	3	3	4	4	4	4	4	5	5	3	5	2	1	1	1	1	0	1	1	1	0
3	1	1	1	1	17	3	2	3	2	2	2	1	5	3	3	3	4	5	5	5	5	5	4	3	4	4	4	4	4	3	4	4	4	4	4	1	1	1	1	5	1	1	1	1	0	0	0	0	0
5	1	1	1	0	17	1	2	3	2	3	3	3	4	2	1	3	1	4	4	3	3	4	4	4	4	4	4	4	4	4	3	4	4	4	3	1	1	1	1	5	0	1	1	1	0	0	0	0	0
3	1	1	1	0	17	1	5	5	5	5	3	5	5	2	2	3	4	5	5	4	4	2	4	4	3	4	4	4	1	2	1	4	4	4	3	1	1	1	1	4	1	1	1	1	0	0	0	0	0
3	1	1	2	0	17	2	5	3	5	5	2	2	4	2	1	3	2	2	5	1		1	4	3	4	4	4	4	3	3	3	4	4	4	4	1	1	1	1	3	1	0	1	1	0	0	1	0	0
3	1	1	1	0	17	1	2	1	2	4	3	3	4	4	4	1	3	5	3	4	5	5	4	4	4	4	4	4	3	4	3	4	4	4	4	1	1	1	1	4	1	1	1	1	0	0	0	0	0
3	1	1	2	1	17	5	5	4	4	4	4	5	3	4	5	2	3	4	5	4	5	5	4	2	3	2	4	4	3	3	3	3	4	3	3	1	1	1	1	5	1	1	1	1	0	1	1	0	0
3	1	1	1	1	17	3	5	3	3	3	2	3	2	2	1	1	1	5	3	3	4	3	4	3	3	4	3	3	3	4	3	3	4	3	3	1	1	1	1	5	1	1	1	1	1	1	0	0	0
3	2	2	2	0	17	1	4	3	5	5	1	3	5	5	5	5	5	4	4	4	2	3	3	3	4	4	4	4	4	4	4	4	4	3	1	2	2	2	2	5	1	1	1	1	0	1	0	1	0
3	1	2	1	1	17	2	5	5	5	5	5	5	5	5	5	2	3	4	5	4	4	3	4	3	4	4	4	4	4	4	4	3	3	3	2	1	2	1	1	5	1	1	1	1	1	0	1	0	0
3	1	1	1	1	17	1	4	5	5	5	5	5	4	3	3	3	1	3	4	5	3	5	4	2	4	4	3	4	4	4	4	4	4	2	4	1	1	1	1	5	0	1	1	1	0	1	0	0	0
3	1	1	1	0	17	2	4	3	4	4	4	5	3	2	1	1	1	5	5	4	3	3	4	3	4	4	4	4	4	4	4	3	3	4	3	1	1	1	1	5	1	1	1	1	0	0	1	1	0
5	1	2	1	0	16	1	5	5	3	3	3	3	5	3	2	5	1	5	4	3	5	5	4	4	2	4	4	4	3	4	4	4	4	4	4	1	1	1	1	4	1	1	0	1	1	1	0	0	0
3	1	1	1	1	16	3	4	3	4	5	3	3	3	1	1	2	1	5	4	4	5	3	4		3	3	3	4	4	4	2	4	4	4	4	1	1	1	1	4	1	1	0	1	1	0	0	0	0
3	1	1	1	0	16	2	2	3	4	2	3	5	4	2	3	2	1	4	5	2	4	2	4	3	4	4	3	4	3	3	1	4	4	4	4	1	1	1	1	5	1	1	1	0	0	0	0	0	0
9	2	2	9		17																																			1							0	0	0
4	2	2	2	0	16	3	3	4	4	5	3	3	4	2	1	1	1	3	3	3	3	2	4	4	3	4	4	3	3	3	4	4	4	4	4	1	1	1	1	4							1	0	0
5	1	2	2	1	#NULL!	3	4	4	4	3	3	3	3	2	2	2	2	4	4	3	2	3	4	3	3	3	4	3	4	4	3	3	3	4	3	1	1	1	2
3	1	1	1	1	16	4	4	4	4	4	4	4	4	5	1	3	4	3	4	4	4	3	3	2	4	4	3	3	3	3	3	3	3	3	2	1	1	1	1	1	1	1	1	1	1	1	0	0	0
7	2	2	2	1	17	3	4	4	4	4	4	3	2	2	2	1	1	4	3	3	3	3	3	3	4	4	4	3	3	3	3	4	4	4	1	1	1	1	1	3	1	1	1	1	0	1	1	0	0
3	1	2	2	1	16	5	3	4	5	5	5	5	5	5	5	5	1	1	4	3	1	1	2	1	1	1	2		4					1	1	1	1	1	1	4	0	0	1	1	1	1	0	3	2
3	1	2	2	1	16	3	5	3	3	3	4	5	1	1	1	1	1	4	5	5	4	4	4	4	4	4	4	3	4	4	4	4	4	4	4	1	1	1	1	5	1	1	1	1	0	0	0	0	0
3	2	2	2	1	17		4	4	5	5	5	5						5	4	4	5	4	3	4	3	3	4	4	3	3	3	2	4	4	4	1	1	1	1	1	0	0	0	0	0	0	0	0	0
5	1	1	1	0	16	1	2	2	2	3	3	3	2	2	1	1	1	5	5	4	5	5	4	4	4	4	4	3	3	3	3	3	3	3	3	1	1	1	1	5	1	1	0	0	1	0	0	0	0
3	1	2	2	1	16	4	3	4	3	4	5	5	2	2	1	1	1	3		3		3	4	4	4	4	4	4	4	4	4	4	4	4	4	1	1	1	1	5	0	0	0	0	0	0	0	0	0
3	1	1	1	0	16		4	4	2	3	1	1	4	4	1	1	3	4	4	3	2	2	4	4	3	4	4	4	4	4	3	4	4	4	3	1	1	1	1	4	1			1			0	0	0
3	1	1	2	1	17	5	3	4	2	3	5	4	3	2	3	1	2	3	4	4	1	3	4	3	2	2	4	3	3	2	1	4	3	4	3	4	5	3	5		0	1	0	1	0	1		0
3	2	2	2	0	#NULL!		4						3			1	1			5		1	1		4	3	1	4				1	1								0	1			1	1	0	0	0
4	1	1	1	0	#NULL!	2	2	4	3	4	2	4	3	1	1	1	1	4	4	1	4	5	4	2	4	3	4	4	4	4	4	4	4	4	4	1	1	1	1	3	1	0	1	0	0	1	0	0	0
3	1	1	1	0	16	3	4	2	5	4	3	3	4	1	2	2	2	4	5	5	3	3	4	4	4	4	4	3	3	3	3	4	4	4	3	1	1	1	1	5	1	1	1	1	0	1	1	0	0
4	1	1	1	0	16	2	5	4	4	4	3	4	4	3	2	2	3	5	5	4	4	4	3	4	4	4	3	4	4	4	2	4	4	4	1	1	1	1	1	5	0	1	0	1	1	0	1	0	0
5	1	1	1	0	16	2	2	4	3	4	3	4	2	2	1	1	1	4	5	3	3	4	4	4	4	4	4	4	4	4	4	4	4	4	3	1	1	1	1	4	1	1	1	0	0	0	0	0	0
3	1	1	1	1	16	1	1	3	4	4	1	5	5	2	4	1	1	4	3	3	4	2	4	3	2	3	2									1	1	1	1	4	1	0	0	0	0	0	1	0	0
3	1	1	1	1	16	3	4	3	5	4	4	3	3	3	4	5	4	3	1	3	3	3	2	1	3		3	3	3	3	2		4	2	1	1	1	1	1	4	0	0	1	1	0	0	0	0	0
3	1	2	2	0	16	5	5	5	5	5	5	5	5	5	1	5	5	4	5	1	3	2	1	1	1	1	1	4	4	3	4	1	1	1	1	1	1	1	1	5	1	0	1	1	0	0	0	0	0
3	1	2	2	0	#NULL!	2	4	3	3	4	3	4	4	4	2	2	2	4	5	3	3	4	4	2	4	4	3	4	4	4	4	4	4	4	1	1	1	1	1	4	1	1	1	1	0	0	1	0	0
3	1	2	2	0	16	2	5	5	5	5	3	4	4	3	2	2	2	4	4	3	5	4	3	3	4	3		4	4	3	3	4	4	3	3	1	1	1	1	3	1	0	1	1	0	0	0	0	0
5	2	2	2	1	18	1	1	1	5	5	1	1	4	4	3	1	1	4	4	4	4	4	3	2	3	3	3	3	3	3	3	3	3	2	1	1	4	1	1	4	1	1	1	1	0	0	0	0	0
6	2	2	2	1	13	2	2	3	3	2	2	2	2	2	1	1	1	4	4	4	3	4	3	2	4	4	3	3	3	3	3	1	2	2	1	1	1	1	2	5	1	1	1	1	0	1	0	0	0
3	2	2	2	0	18	2	4	4	4	4	4	3	2	4	3	3	2	4	5	3	4	4		2	4	4	1	3	4	4	2	4	4	4	2	2	2	2	2	5	1	1	1	1	1	1	0	0	0
3	2	2	2	1	15	1	1	1	1	1	1	1	1	1	1	1	1	5	4	4	5	5	4	4	4	4	4	4	4	4	4	4	4	4	4	1	1	1	1	5	0	1	0	0	1	1	0	0	0
3	1	2	2	1	16	1	1	1	1	1	1	1	4	1	2	2	2	4	4	3	3	2	4	3	4	4	4	3	3	3	3	4	4	3	2	1	1	1	1	5	1	0	0	1	0	0	0	0	0
3	1	1	1	1	16	2	2	3	3	2	1	5	2	1	2	1	1	5	5	4	5	5	4	3	4	4	4	4	4	4	4	4	4	4	4	1	1	1	1	4	1	0	1	0	0	1	0	0	0
3	1	1	1	1	16	3	2			2	3	4	2	1	3	2	1	4	4	4	4	4	4	4	4	4	4	3	3			3	3	3	3	1	1	1	1	5	1	1	1	1	0	1	0	0	0
5	1	1	1	0	17	3	5	5	4	3	2	2	3	1	1	2		5	5	3	5	3	4	4	3	3	4	3	4	4	4	4	4	4	3	1	1	1	1	5	0	1	0	0	0	1	0	1	0
7	1	1	2	1	16	3	1	4	1	4	5	5	1	1	1	1	1	5	5	4	2	4	3	4	2	2	4	1	2	2	1	2	4	4	4	1	1	1	1	4	0	0	1	1	0	0	1	0	0
3	1	1	1	1	16								4	1	4	1	1	3	3	3	1	3		1	1	1		4	1	1		4	4	2	2	1	1	1	1	2	0	0	0	1	0	0	0	0	0
3	2	2	2	1	17	3	4	2	2	2			5		5	2	2	5	2	3	4		2	2	2	2	2	3	3	3	3	3	3	3	3	1	1	1	1	5	0	0	0	0	0	0	0	0	0
3	1	1	1	1	16	3	4	2	2	2	3	3	5	5	4	1	1	3	4	3	3	3	4	2	3	3	3	3	3	3	3	2	3	2	2	1	1	1	1	4	1	1	0	0	1	1	1	0	0
3	1	1	1	1	16	3	3	4	5	5	4	5	1	1	1	1	3	4	5	4	4	4	4	3	3	3	3	4	2	2	2	3	3	3	2	1	1	1	1	4	1	1	1	1	0	1	0	0	0
3	2	2	2	0	16	3	3	3	3	3	3	3	3	1	1	1	1	4	3	3	4	4	4	4	4	4	4	4	4	4	4	4	4	4	3	1	1	1	1	5	1	1	1	1	0	0	1	0	0
3	1	1	1	1	16	3	3	4	4	4	4	4	4	4	2	1	1	3	4	2	3	3	4	2	4	3	3	4	3	2	3	3	2	2	1	1	1	1	1	4	0	0	0	0	0	0	0	0	0
3	2	2	2	0	16	3	4	3	3	3	3	3	2	2	2	2	1	3	1	2	1	3	4	4	4	4	4	4	4	4	4	4	4	4		1	1	1	1		1	1	1	1	0	0	0	0	0
5	1	1	2	1	16				5	2	3		1	1	1	1	1	4	4	3	4	3	3	2			3	4								1	1	1	1	5	0	0	0	1	0	0	0	0	0
3	1	1	1		16	3	4	5	4	4	3	4	4	2	2	1	2	4	5	4	4	4	4	3	4	4	4	4	3	3	2	4	3	4	3	1	1	1	1	4	1	0	1	1	1	1	0	0	0
3	1	1	1	1	16	2	1	1	2	3	1	5	3	1	1	1	1	2	3	2	2	3	4	4	4	3	3	4	4	3	2	4	4	4	4	1	1	1	1	4	1	1	0	0	0	0	0	0	0
3	1	1	1	0	16	1	1	2	1	2	2	3	2	1	1	1	1	5	5	2	3	4	4	4	4	4	4	4	4	4	4	4	4	4	4	1	2	1	1	4	1	1	0	0	0	1	0	0	0
4	2	2	2	0	16								1	3	2	1	1	5	5	5	5	5							1	1		4	4	4	4	1	1	1	1	4							1	0	0
3	1	1	1	0	16		4	4	4	3	3	4	1	1	1	1	1	4	3	2	3	3	4	3	4	4	4	4	4	4	4	4	4	4	3	1	1	1	1	5	1	1	0	0	1	1	1	0	0
3	1	1	2	0	16	1	1	2	3	5	1	3	1	1	2	1	2	5	4	3	3	5	4	4	4	4	4	4	3	3	4	3	4	3	2	1	1	1	1	5	1	0	0	1	0	1	0	0	0
3	1	1	1		16	3	4	3	3	4	3	4	2	1	1	3	1	5	4	4	5	3	4	3	3	3	4	4	3	4	4	4	4	3	2	1	1	1	1	4	1	1	0	1	0	1	0	0	0
3	1	1	1	1	16	2	4	3	5	5	2	4	1	1	1	1	1	5	4	3	4	3	4	4	4	4	4	3	3	3	4	3	3	3	3	1	1	1	1	5	0	0	0	0	0	0	1	0	0
5	1	2	2	0	16	3	5	3	4	3	4	3	3	1	2	1	4	4	4	4	5	5	4	4	4	4	4	4	4	4	3	4	4	3	2	1	1	1	1	5	0	1	1	1	0	1	0	0	0
3	2	2	2	0	16	1	5	4	4	3	4	4	3	1	1	1	1	3	1	1	4	1	4	2	3	2	4	3	3	3	3	4	4	4		1	1	1	1	2	1	1	1	1	0	0	0	0	0
10	2	2	2		18	5	5	5	5	5	5	5	1	1	1	1	1	5	5	5	5	5	1	1	1	1	1	4	4	4	4	4	4	4	4	5	5	5	5	1							4	5	0
3	1	1	1	0	16	1	1	3	3	3	3	3	3	1	1	1	2	4	5	3	3	3	4	4	3	3	3	3	4	3	3	4	4	4	3	1	1	1	1	5	0	1	1	1	1	0	0	0	0
3	1	1	1	1	16	1	2	5	5	5	4	5	3	1	3	1	1	3	5	4	4	3	4	3	4	4	4	4	3	3	2	4	4	4	4	1	1	1	1	3	0	0	0	0	0	0	0	0	0
3	1	1	1	1	16	2	5	4	4	4	5	5	4	2	2	3	1	5	4	4	5	5	4	3	4	4	4	4	3	2	3	3	3	4	4	1	1	1	1	5	1	1	1	1	0	0	1	0	0
3	1	1	1	0	16	5	5	4	5	5	5	5	1	2	2	1	1	5	5	4	5	4	4	4	4	4	4	4	3	4	2	4	4	4	4	1	1	1	1	5	1	1	1	0	0	1	2	1	0
1	2	2	2		13	5	5	5	4	4	5	5						1	5	4	1	4	4		1	4	4									1	1	1	1								4	0	4
5	1	1	1	0	16	1	1	1	4	2	1	3	2	1	1	1	1	5	5	5	5	4	4	4	4	4	4	4	4	4	4	4	4	4	3	1	1	1	1	5	1	1	0	0	0	0	0	0	0
3	1	1	1	0	16																																			1							0	0	0
5	1	2	2	0	17	2	2	3	4	4	5	5	5	4	1	1	1	4	4	3	3	4	4	4	4	4	4	4	4	4	4	4	4	4	3	1	1	1	1	4	1	1	1	1	1	0	0	0	0
5	1	1	1	1	17	1	1	1	3	3	5	3	3	3	4	1	1	4	5	5	5	3	4	4	4	4		4	4	4	4	4	4	4	4	1	2	2	1	5	1	1	1	1	1	1	0	0	0
3	1	1	1	1	17	3	4	3	4	4	3	5	2	1	3	1	1	4	5	3	2	4	3	3	4	4	3	3	2	2	3	4	4	4	4	1	1	1	1	4	1	0	1	1	0	1	0	0	0
3	1	1	1	0	17	2	5	4	4	4	3	4	3	2	3	2	1	4	4	3	3	4	4	4	4	4	4	4	3	3	2	3	3	3	3	1	1	1	1	5	1	0	0	0	0	0	0	0	0
3	1	1	1	0	17	2	2	3	3	5	2	2	3	3	3	3	3	5	5	5	5	4	4	4	4	4	4	4	3	3	2	4	4	4	4	1	1	1	1	4	1	1	0	0	0	1		0	0
3	1	1	2	0	17	2	4	5	2	2	5	5	2	1	1	1	1	1	4	2	1	2	3	2		3	1	4	1	2	3	3	2	3	2	1	2	1	1	4	1	1	1	1	1	1	2	0	0
3	1	1	1	0	17	2	3	3	4	4	3	3	2	1	1	2	1	2	4	1	4	2	4	2	4	4	2	4	4	4	4	4	4	4	4	1	1	1	1	4	1	1	1	1	0	1	0	0	0
1	1	2	1	0	19	3												4	4	3	3	3						4	4	4	4	4	4	4	2	1	1	1		3							0	0	0
3	1	1	1		17	4	5	5	4	5	4	5	3	1	1	1	1	3	5	2	1	3	3	2	2		3	3	4	4	1	4	4	4	1	1	1	1	1	5	1	1	0	1	0	0	0	0	0
3	1	1	1	0	17	1	4	4	4	4	2	2	5	3	2	2	3	5	5	4	4	4	4	3	4	4	4	4	4	4	3	4	4	4	4	1	1	1	1	3	1	1	1	1	1	1	0	0	0
3	1	1	1	0	#NULL!	4	4	3	3	4	3	3	4	1	1	1	1	5	5	5	4	4	4	4	4	4	4	4	4	4	4	4	4	4	4	1	1	1	1	3	1	1	0	0	0	1	0	0	0
3	1	1	1	1	18	1	1	1	1	4	4	4	2	2	3	1	1	4	5	3	4	2	3	2	4	2	3	3	3	3	1	3	3	2	2	1	1	1	3	5	1	0	1	1	0	1	2	0	0
3	1	1	1	1	17	4	4	3	3	4	5	3	3	2	2	1	2	4	5	4	3	4	4	3	4	4	3	4	3	3	3	4	4	4	3	1	1	1	1	4	1	1	1	1	0	0		0	0
3	1	1	1	1	17	5	5	5	5	5	5	4	2	3	1	3	3	3	5	4	3	5	4	4	4	4	4	4	4	4	2	4	4	4	3	2	2	3	2	4	0	1	0	1	0	1	1	1	1
3	1	1	1	0	17	3	3	3	3	3	3	3	4	2	2	1	3	2	5	4	3	3	4	2	4	3	4	3	3	3	2	4	4	4	2	1	1	1	1	5	1	1	1	1	1	1	0	0	0
4	1	1	1	0	17	2	2	3	3	4	2	5	3	2	1	2	1	4	5	5	5	3	4	4	4	4	4	4	4	4	4	4	4	4	4	2	3	1	1	5	1	1	1	1	1	1	2	1	0
3	1	1	1	0	17	4	4	3	3	3	4	3	3	1	2	1	3	4	5	4	4	3	4	3	4	4	3	4	3	3	2	4	4	4	3	1	1	1	1	5	1	1	0	1	0	0	0	0	0
5	1	1	1	1	16	5	5	4	5	3	5	4	3	1	1	5	4	1	3	1	1	1	1	1	4	1	2	4	4	2	2	1	1	1	1	5	5	5	5	3	0	1	0	1	0	1	2	2	1
3	1	1	1	0	17	3	3	3	3	3	3	3	3	4	2	2	2	3	5	5	5	5	4	4	4	4	4	3	3	3	3	3	3	3	3	1	1	1	1	4	1	0	1	1	0	1	1	0	0
3	1	1	1	1	17	2	2	5	3	4	2	3	3	2	1	1	1	4	5	4	3	3	4	2	3	3	3	3	3	3	3	4	4	4	3	1	1	1	1	3	0	0	1	1	0	1	1	0	0
3	1	1	1	1	17	3	2	2	4	4	4	4	4	2	2	1	1	4	4	4	4	4	4	4	4	4	4	4	3	3	3	3	4	4	4	1	1	1	2	4	1	1	1	1	0	0	2	0	0
3	1	1	1	0	17	4	5	4	5	5	5	5	3	2	2	1	1	4	5	3	4	4	4	2	4	3	3	4	2	3	3	3	3	3	3	1	1	1	2	4	1	1	0	1	1	0	1	1	0
3	1	1	1	1	16	1	1						1	1	1	2	5	4	5	3	4	4	4	3	4	4	4	4	4	4	4	4	4	4	4	1	1	1	1								0	0	0
3	1	1	1		16	3	1	5	5	5	3	5	2	2	1	1	1	5	5	1	3	4	4	4	4	4	4	3	4	4	3	4	4	4	4	1	1	1	1	3	0	1	1	1	0	1	0	0	0
3	1	1	1	1	16	5	4	4	4	4	4	4	4	2	3	2	3	5	2	2	2	4	3	2	3	3	3	3	3	3	2	4	4	2	2	1	1	1	1	5	1	1	1	1	1	1	0	0	0
3	1	1	1	1	17	4	3	3	5	4	5	3	2	2	2	2	2	4	4	3	3	3	4	2	2	4	4	4	2	2	2	2	1	3	3	1	1	1	1	4	0	0	0	1	0	1	1	0	0
6	1	1	1		17	3	2	4	4	4	4	4	2	1	2	2	1	4	4	4	3	3	3		3	2	3	4	3	3	3	3	3	3	3	1	2	1	1	3	1	1	1	1	0	1		0	0
3	2	2	2	0	17	1	1	1	3	4	1	1	5	5	1	4	1	4	5	5	3	4	4	4	4	4	4	4	4	4	4	4	4	4	2	1	1	1	1	5	1	1	0	1	0	0	1	0	0
3	1	1	1		16	5	4	4	4	5	4	5	1	1	1	2	5	5	5	4	3	5	4	4	4	4	4	4	4	4	3	4	4	3	2	1	1	2	1	5	0	1	1	1	0	0	1	0	0
3	1	1	1	1	17	3	2	2	4	4	1	5	3	3	2	3	2	4	5	5	5	3	4	4	4	4	4	4	4	4	4	4	4	4	4	1	1	1	1	3	1	0	0	0	0	0	1	0	0
3	1	1	1	1	#NULL!	4	4	4	4	4	5	5	4	2	2	1	3	4	5	5	4	4	4	2	4	4	4	4	3	2	2	3	3	4	3	1	1	1	1	4	1	1	1	1	0	0	2	2	0
3	1	1	1	0	17	3	3	4	4	4	3	5	3	2	1	1	3	3	5	3	3	4	4	4	4	4	4	4	4	4	4	4	4	4	3	1	1	1	1	4	1	1	1	1	0	1	1	0	0
3	1	1	1	1	17	3	3	4	4	2	4	3	4	3	3	1	2	3	2	3	2	3	3	3	3	3	3	3	2	2	2	1	1	1	1	1	1	1	1	4	1	1	0	1	0	0	0	0	0
3	1	1	1	1	16	2	4	5	5	5	5	5	1	1	1	1	1	4	4	2	4	3	4	4	4	4	4	4	4	4	4	4	4	4	4	1	1	1	1	4	1	1	1	1	1	1	0	0	0
3	1	2	2	0	16	3	4	4	4	4	3	3	4	3	1	2	2	1	4	1	1	3	4	4	4	4	4	4	4	3	3	4	4	4	4	1	1	1	1	4	1	1	1	1	0	0	0	0	0
3	1	1	1	0	17	5	5	5	5	4	5	5	3	4	4	2	5	5	5	5	5	5	3	1	4	1	3	4	4	4	4	4	4	3	3	1	1	1	1	5	1	1	1	1	0	1	2	1	1
3	1	1	1	1	17	2	4	3	1	1	4	4	2	1	1	3	1	4	5	3	5	4	4	2	4	4	3	4	4	3	3	3	4	4	3	3	3	3	2	4	1	1	1	0	0	0	2	0	0
3	1	1	1	0	16	3	5	5	5	5	3	5	4	4	4	2	3	3	5	2	4	3	4	4	4	4	4	4	3	4	3	4	4	4	4	1	1	1	1	5	1	1	1	1	0	1	0	3	0
3	1	1	1	1	17	2	4	3	4	4	4	5	2	1	1	3	4	4	5	5	4	5	4	4	3	3	3	4	2	4	4	3	3	3	3	1	2	1	1	4	1	1	1	1	0	1	1	0	0
3	1	1	1	1	17	3	3	3	3	3	4	5	1	3	2	2	2	5	5	4	5	3	4	4	4	4	4	4	3	4	3	4	4	4	3	2	2	1	2	4	1	0	0	1	1	1	2	1	0
3	1	1	1	1	17	4	4	3	4	4	4	4	3	1	1	2	2	3	4	4	3	3	3	2	3	2	2	4	3	3	2	3	3	3	3	1	1	1	2	4	1	0	1	1	0	1	2	2	0
3	1	2	1	1	17	4	2	2	3	3	4	3	2	3	2	2	1	3	4	4	4	4	3	2	4	4	4	4	3	3	3	3	2	3	1	1	1	1	1	5	1	1	1	1	0	0	1	0	0
3	1	1	1	1	16	2	1	3	2	5	2	1	1	1	1	1	1	5	5	3	5	4	4	4	4	4	4	4	4	4	3	4	4	4	4	1	1	1	1	5	0	0	1	0	0	0	0	0	0
3	1	1	1	1	17	5	5	4	4	4	4	4	4	4	4	1	2	4	4	4	4	4	4	4	4	4	4	4	4	4	3	3	3	3	2	2	2	2	2	5	1	1	1	1	0	0	2	0	0
3	1	2	1	1	17	3	4	4	4	4	5	5	3	2	2	1	2	4	5	5	5	4	4	3	3	3	4	4	4	4	4	3	4	4	2					4							1		0
3	1	1	1	1	17	2	4	3	3	3	3	3	1	1	1	1	1	3	5	5	5	5	4	4	4	4	4	4	4	3	3	3	2	3	2	1	1	1	1	4	0	1	1	1	0	1	0	0	0
3	1	2	2	1	16	3	5	2	5	5	3	5	1	1	1	1	1	5	5	3	4	5	4	4	4	4	4	4	4	4	4	4	4	4	4	1	1	1	1	5	1	1	1	1	1	1	1	0	0
3	1	1	1	1	16	4	4	4	4	4	4	4	2	1	1	1	1	4	4	3	4	4	4	4	4	4	4	4	3	3	3	4	4	4	4	1	3	1	1	4	1	1	1	1	0	1	0	0	0
5	1	1	1	0	16	3	2	4	3	3	3	3	5	4	2	5	3	2	3	3	3	3	3	2	3	3	3	3	3	3	3	4	3	4	4	1	1	1	1	4	0	0	1	1	0	0	0	1	0
5	1	1	1	1	17	2	3	2	4	3	4	3	3	2	3	2	2	2	3	2	3		4		3		3	3	3	3	3	3	3	2	1	2	2	2	2	5	0	0	0	1	0	0	0	0	0
3	1	1	1	0	17	3	3	4	4	4	4	4	4	2	2	1	3	3	4	4	2	2	4	3	3	4	4	4	4	4	4	4	4	4	3	1	3	1	1	4	1	1	0	1	0	0	1	0	0
3	1	1	1	1	17	4	4	4	3	3	3	3	2	2	3	3	2	3	5	4	3	4	4	3	3	3	4	4	4	4	4	4	4	4	3	1	3	1	1	4	1	0	0	1	0	0	1	0	0
3	1	1	1	1	17	3	3	4	4	4	4	4	3	2	1	1	1	4	5	3	5	5	4	3	4	4	4	4	3	3	3	4	4	4	4	2	3	1	1	4	1	1	1	1	0	1	1	0	0
3	1	1	1	1	17	3	5	4	5	5	4	5	1	1	1	1	1	3	5	5	4	4	4	4	4	4	4	4	4	3	3	4	4	4	4	1	1	1	1	4	1	0	0	1	0	1	1	0	0
4	1	2	2	0	17	5	3	5	5	5	5	5	5	5	5	5	5	5	5	5	5	4	4	4	4	4	4	1	4	4		4	4	4	4	1	1	1	1	3	0	1	0	1	0	1	1	3	0
3	1	1	1	0	17	4	4	4	4	4	4	4	4	3	1	2	1	4	4	3	3	3	4	3	4	4	4	4	4	4		4	4	3	4	1	1	1	1	3	1	1	0	0	0	1	2	1	1
4	1	1	1	1	17	3	2	1	2	1	2	4	2	1	2	1	1	5	5	5	5	5	4	4	4	4	4	3	4	4	3	2	4	4	2	1	1	1	1	5	0	1	0	1	0	1	0	0	0
3	1	1	1	0	16		3	3	3	3	3	3	5	4	2	3	2	2	2	3	3	2	3	3	1	1	1	3	1	2	1	4	4	4	3	1	2	1	1	5	1	0	1	1	0	1	1	0
3	1	1	1	1	17	2	4	4	4	4	2	3	3	2	2	2	2	3	4	4	4	4	3	3	3	3	4	4	4	3	3	3	3	3	3	2	2	1	1	3	0	0	1	1	0	0	1	0	0
3	1	1	1	0	17	4	3	5	4	5	5	4	4	2	2	2	3	4	5	3	4	3	3	1	3	2	1	4	4	4	4	4	4	4	4	1	1	1	1	4	0	0	0	1	0	1	1	0	0
5	1	1	1	0	17	3	2	3	4	4	4	4	2	2	1	1	1	5	5	5	5	5	4	4	4	4	4	4	4	3	4	4	4	4	4	1	1	1	1	4	1	1	1	1	1	1	1	0	0
3	1	1	1	0	16								2	1	2	1	1	5	5	5	3	3	4	3	3	2	2	3	3	3	3	3	3	3	3	1	1	1	1	4	1	0	1		0	0	0	0	0
3	1	1	1	0	17	3	4	4	4	4	3	4	2	2	1	2	1	4	5	4	4	4	4	3	4	3	4	3	3	2	2	2	3	3	2	1	1	1	1	2	1	1	0	0	0	0		0	0
3	1	1	2	0	17	3	3	3	4	4	4	5	1	1	1	1	1	3	4	2	3	3	3	3	4	3	3	4	2	2	2	4	4	2	3	1	1	1	1	4	1	0	1	1	0	1	0	0	0
1	1	1	1	1	17													5	5	3	4	3	4	2	2	3	4	4	2	2	2	3	3	2	2	1	2	1	1		1	0	1	1	0	0	1	0	0
3	1	1	1	1	17	3	4	3	4	5	4	5	2	2	5	3	2	4	4	4	4	3	4	3	4	4	4	4	3	3	3	4	3	4	3	3	4	2	2	4	1	0	0	0	0	1	2	1	0
3	1	1	1	0	17	2	2	4	4	5	3	5	5	5	4	3	4	4	5	4	3	4	4	4	4	4	4	4	3	2	4	4	4	4	4	1	2	1	1	5	1	1	1	1	1	0	1	3	0
3	1	1	1	1	17	2	3	2	3	4	5	5	3	1	3	1	1	5	5	4	4	3	4	3	4	3	4	4	2	4	4	4	3	3	4	1	3	1	1	4	0	0	1	1	0	1	2	0	0
3	1	1	1	1	17	3	3	3	5	5	5	5	2	2	2	2	2	4	4	3	3	3	4	4	4	4	4	4	4	3	3	4	4	4	4	1	1	1	1	5	1	1	0	1		1	2		0
3	1	1	1	1	16	3	3	4	4	5	5	4	3	2	2	2	2	3	4	3	2	3	3	1	3	1	1	3	4	2	3	4	4	4	2	1	1	1	1	4	1	1	0	0	0	0	1	0	0
3	1	1	1	0	17	4	4				2		5	5	5	2		4	4		4	4	3		4	4	4	3		3	1	3	3			1	1	1	1	5	1	1	1	1	1	1			0
3	1	1	1	0	16	5	5	5	5	5	5	5	4	2	3	1	4	3	5	2	2	3	4	4	4	4	4	4	2	3	1	3	4	3	2	1	1	1	1	5	0	1	0	1	1	1	1	0	0
3	1	1	1	1	17	5	4	5	4	5	5	5	3	1	1	1	1	4	4	4	3	3	4	4	4	4	4	4	3	3	3	3	3	3	1	1	2	1	1	5	1	1	0	1	0	1	0	0	0
3	1	1	1	0	17	5	5	5	5	5	2	2	4	2	3	1	2	3	4	4	3	3	4	4	4	4	4	4	4	4	1	4	4	4	3	1	2	1	1	5	1	1	1	1	0	0	0	0	0
3	1	1	1	0	17	5	4	3	4	5	4	3	1	1	4	4	2	5	4	5	4	3	3	2	3	2	4	4	2	3	2	3	3	4	3	5	4	3	2	2			1	0	0	0	1	0	0
3	1	1	1	0	17	4	4	3	4	4	5	5	1	3	1	1	3	3	5	3	2	2	4	3	4	4	4	3	3	4	2	2	4	4	1	1	2	1	2	4	1	1	0	1	0	0	1	0	0
5	1	1	1	1	17	4	1	4	4	4	4	4	2	1	2	1	1	4	5	1	3	1	4	4	4	4	4	4	3	3	2	4	4	4	3	1	1	1	1	5	1	0	1	0	0	0	1	0	0
1	1	9	1	0	17	3	5	4	4	5	3	5	5	4	4	2	1	4	3	2	2	1		3	4	4	3	3	2	1	1	4	4	4	3	1	1	1	1	4	1	0	1	1	0	0	0	0	0
3	1	1	1	0	17	4	4	4	4	5	5	5	3	3	2	3	1	4	4	4	4	3	4	4	4	4	4	3	2	2	2	4	4	4	3	1	1	1	1	4	1	1	1	1	0	1	1	0	0
3	1	1	1	1	17	5	4	3	2	3	4	5	1	3	1	4	2	4	4	3	3	4														2	4	4	3	4							0	0	3
3	1	2	1	0	17			4	4	4		4	5	3	2	2	3	5	5	2	5	4	4	4	4	4	4	4	3	3	3	4	4	4	3	1	1	1	1	4	1	1	1	0	0	1	0	0	0
3	1	1	1	0	17	1	3	3	3	2	2	3	5	2	1	1	2	4	5	3	4	3	4	3	4	4	4	3	3	3	3	4	4	4	4	1	1	1	1	5	0	0	0	0	0	0	0	0	0
3	1	1	1	1	17	4	5	4	4	3	4	3	2	4	1	1	1	4	4	4	4	3	4	4	4	4	4	4	3	3	3	3	4	3	2	1	1	1	1	5	0	1	0	0	0	0		0	0
1	2	2	2	0	16	1	5	5	5	5	5	5	3	3	3	1	1	3	3	4	1	2	4	3	3	3	3	3	4	4	4	4	4	4		1	1	1	1	5	0	1	0	1	0	1	1	0	0
5	2	2	2	0	16	3	2		3	3	3	3	4	4	4	1	2		3	3	3	5	4		4	4	4	4	4	4	4	4	4	4	4	1	1	1	1	5	0	1	1	0	1	1	1	0	0
5	1	1	1	0	16	1	1	5	5	5	5	5	3	1	1	5	1	4	5	3	5	3	4	4	4	4	4	4	4	4	4	4	4	4	1	1	1	1	1	5	1	1	1	1	1	1	1	3	0
3	1	1	1	1	17	2	1	3	4	5	3	4	2	3	3	1	2	5	4	3	2	4	4	2	3	4	3	4	3					1		1	1	1	1	3	1	1	1	1	0	0	1	0	0
3	1	2	2	1	16	3	2	2	4	5	3	5	1	1	1	1	1	4	4	2	3	3	4	3	3	4	3	3	3	3	4	3	4	3	1	1	1	1	1	4	0	1	1	1	0	1	0	0	0
6	2	2	2	1	18	3	4	5	5	5	5	5	2	1	3	3	1	4	3	4	4	5	2	1	4	2	2	3	2	1	1	4	4			1	1	1	1	5	0	0		0			0	0	0
3	1	1	1	1	16	1	3	3	4	4	5	5	3	1	3	3	1	4	4	3	1	3	4	3	4	4	4	4	2	3	1	4	4	2	1	1	1	1	1	5	1	1	0	0	0	1	0	0	0
3	2	2	2	1	16	4	2	3	5	5	5	4	4	3	4	3	2	4	5	3	4	4	4	4	2	3	4	4	3	4	4	3	4	4	2	1	1	1	1	4	1	1	0	1	0	0	1	0	0
3	1	2	2	1	16								1	4	1	1	1	5	4	4	1	2	1	1	3	4	2	4	2		3	1	2	3	4	1	3	5	1	4	0	0	0	0	0	0	0	0	0
7	2	2	2	1	17	3	3	4	5	5	4	5	1	1	1	1	1	4	4	3	3	5	3	2	3	3	4		3	3	3	4	4	4	2	1	1	1	1	5	1	1	1	0	1	0	0	0	0
6	1	2	2	0	#NULL!	4	4	4	2	5	4	5	2	2	1	1	1	5	5	3	5	5	3	2	4	4	4	4	3	3	3	4	4	3	3	1	1	1	1	5	0	1	0	1	0	0	0	0	0
3	1	1	1	0	16	3	4	3	4	4	4	4	2	4	1	1	2	5	4	4	4	4	4	3	4	4	4	4	3	3	2	4	4	4	3	1	1	1	1	3	0	0	0	1	0	0	0	0	0
3	1	2	2	0	17				3	3	3	3	2	3	2	1	3	3	3	4	2	3						4	3	3	3	3	3	4	3	1	1	1	1	5	0	0	1	1	0	0	0	0	0
5	1	1	1	1	16	2	5	5	4	4	2	4	2	1	1	1	1	4	5	4	4	4	4	3	4	4	4	4	4	4	4	4	4	4	3	4	1	1	1	5	1	1	0	1	1	0	1	0	0
3	1	2	2	1	17													4	4	4	3	3		3	4															5							0		0
3	1	2	2	1	16	2	2	3	4	4	3	2	1	2	1	1	1	4	4	4	4	3	4	2	3	3	4	4	3	3	3	3	3	3	3	1	1	1	1	4	1	1	1	1	0	1	0	0	0
3	1	1	1	0	16	2	4	3	4	4	4	3	3	1	1	1	2	5	5	4	4	4	4	4	4	4	4	4	3	3	2	3	4	4	2	1	1	1	1	5	1	1	1	0	1	1	0	0	0
3	1	1	1	1	16	3	4	5	5	5	5	4	1	3	2	1	1	5	5	3	4	5	4	4	4	4	4	4	3	3	4	3	4	4	4	1	1	1	1	4	1	1	0	1	1	0	0	0	0
6	2	2	2	0	16	1	1	3	4	4	5	5	3	2	2	2	1	3	4	3	5	5	4	2	3	3	2	4	1	1	1	4	4	1	2	1	1	1	1	5	1	1	0	0	1	1	0	0	0
3	1	2	2	1	16	1	4	4	5	5	1	4	1	1	2	2	2	1	3	4	3	4	4	3	4	4	4	4	3	3	3	4	4	3	3	1	1	1	1	5	1	1	1	1	0	1	0	0	0
3	1	1	1	1	#NULL!	3	2	2	1	1	2	1	4	2	1	2	2	3	5	3	4	5	4	4	4	4	4	3	4	2	2	4	4	4	4	1	1	1	1	3	0	1	0	1	0	0	0	0	0
3	1	2	1	0	16	2	3	5	5	5	4	5	4	2	1	1	1	5	4	3	5	3	4	1	2	1	3	4	3	4	2	4	4	3	3	1	1	1	1	5	1	1	0	1	0	0	0	0	0
3	1	2	2	0	16	2	3	4	4	4	1	3	5	4	3	3	3	4	4	4	5	5	4	2	4	3	3	4	4	4	4	4	4	4	3	1	1	1	1	5	1	0	0	1	0	0	0	0	0
5	1	1	1	1	16	5	4	5	5	5	5	5	2	1	1	1	1	5	5	5	5	5	4	4	4	4	4	4	4	4	4	4	4	1	1	1	1	1	1	5	1	1	0	0	1	0	0	0	0
3	1	2	2	0	16	1	2		5	5		1	4	2	1	1	3	3	5	5	3	3	3		4			4	4	4	4	4	4	3	2	1	1	1	1	5	1	1	1	1	0	0	0	0	0
3	1	1	1	1	17								1	2	2	2	2	4	3	4	2	3																		5							0	0	0
3	2	2	2	0	16																																			5	0	0	0	1	0	0	0	0	0
3	1	2	2	0	16	4	5	4	2	2	3	5	4	1	2	1	3	4	3	2	4	3	4	3	4	2	3	4	3	3	3	4	4	4	1	1	1	1	1	5	1	1	1	1	1	0	2	0	0
3	1	1	1	1	17	1	1	4	5	5	2	4	4	4	1	1	1	4	3	4	5	3	4	4	4	4	4	3	3	4	4	4	4	4	1	1	1	1	1	4	1	1	1	1			0	0	0
5	1	2	2	1	16	3	2	3	5	4	3	3	2	1	1	1	1	3	4	4	4	4	4	3	4	4	4	4	4	3	3	3	3	3	2	2	2	2	2	4	1	1	1	1	0	1	0	0	0
3	2	2	2	0	#NULL!	3	3	5	4	3	3	2	3	2	1	1	1	3	3	2	4	3	4	3	4	4	4	3	2	4	3	4	4	2	2	1	1	1	1	4	1	0	1	0	0	1	0	0	0
7	2	2	2	1	16													3		2	4	5	3		3
8	1	1	1	0	16	3	4	4	4	4	3	4	3	3	2	3	3	4	4	3	3	3	3	2	3	2	2	4	3	3	3	3	4	3	3	2	3	1	1	4	1	1	0	1	0	1	1	0	0
3	1	1	1	0	16	4	5	5	5	4	5	5	3	2	3	3	2	5	5	5	4	3	4	4	4	4	4	4	4	4	4	4	4	4	3	1	1	1	1	5	1	1	1	1	0	1	0	0	0
3	1	2	2	1	16	1	1	3	5	4	1	3	3	1	1	1	2	5	5	4	4	5	4	4	4	4	4	4	4	4	3	4	3			1	1	1	1	5	0	1	0	1	0	0	0	0	0
3	1	2	2	1	16								2	1	1	1	1	3	3	2	4	5	4	4	4	4	4	4	4				1	3		1	1	1	1	5	1	1	0	1			0	0	0
4	2	2	2	1	16	1	1	1	1	1	4	4	2	2	1	1	1	3	3	3	4	4	4	4	4	2	4	2	3	3	3	4	4	3	1	1	1	1	1	3	0	1	1	1	1	1	0	0	0
5	1	2	2	1	17	3	4	5	3	3	3	3	3	4		4	4	3	4	3	3	3	3	3	2	3	2	2	1	1	2	1	2	3	1	1	1	1	1		0		0			0	0	0	0
3	1	1	1	0	16	1	1	3	3	3	3	4	5	4	5	2	2	4	4	5	3	2	4	2	2	3	3	4	4	4	3	4	4	3	3	1	1	1	1	4	0	0	1	0	0	0	1	0	0
7	1	1	1	0	16	4	4	4		4	5	5	3	2	1	2	1	4	5	3	4	4	2	3	4	3	3	4	3	3	2	3	3	3	2	1	1	1	1	4	1	1	1	1	0	1	0	0	0
5	1	1	1	1	16	3	5	5	5	4	3	3	3	5	5	3	3	3		1	2	3	3	1	3	4	4	4	4	3	4	1	2	3	1	1	1	1	1	5	1	1	1	1	0	0	0	0	0
3	2	2	2	0	17		5	4	5	5		3	1	3	1	1	1	1	3		3		4	4	4	4	4	4	4	4			4	4		1	1	1	1		0		1	1			0	0	0
3	1	2	2	1	16	3	3	3	3	3	3	3	4	2	2	1	1	4	1	4	3	4	4	4	3		4	3	3	3				3	2	1	1	1	1	5							0	0	0
3	2	2	2	1	#NULL!																																											0
3	1	1	1	1	16	5	5	5	3	3		3	2	1	1	1	1	5	5	4	5	4	4	4	4	3	3	4	4	4	4	4	4	3	4	1	1	1	1	4	1	0	1	1	0	0	0	0	0
3	1	1	1	1	16	3	2		3	1	4	3	3	2	2	2	1	5	5	3	3	4	4	3	4	4	4	4	4	4	4	4	4	4	4	2	3	1	1	4	1	1	1	1	0	0	2	0	0
3	1	1	1	1	16	3	2		3	1	4	3	3	2	2	2	1	5	5	3	3	4	4	3	4	4	4	4	4	4	3	4	4	4	4	2	3	1	1	4	1	1	1	1	0	0	2	0	0
3	1	2	2	0	17	5	4	5	3	3	3	3	3	2	3	2	2	3	3	3	3	3	4	3	4	4	4	3	3	3	3	3	3	3	3	1	1	1	1	5	1	1	0	1	0	0	0	0	0
8	1	1	1	0	16													4	4	4	5	5														1	1	1	1
3	1	2	2	0	16	3	5	3	4	3	3	4	5	5	4	4	4	4	5	4	3	3	4	4	4	4	4	4	3	3	3	4	4	4	2	1	1	1	1	5	1	1	1	1	1	1	0	0	0
3	1	2	2	0	16	3	4	4	4	4	4	5	3	3	1	5	1	3	4	4	4	4	3	1	1	1	3	4	4	4	4	3		3	3	1	1	1	1	4	1	0	1	1	0	1	0	0	0
3	2	2	2	1	17	3	3	3	3	3	3	3	3	3	3	3	3	3	3	2	1	3	3	3	3	3	3	2	2	2	2	2	2	2	2	3	3	3	3	5	1	1	0	1	0	0	0	0	0
5	1	2	2	0	18	5	5	5	5	5	5	5	5	5	5	5	1	5	5	5	5	5	1	1	1	1	1	4	4	3	4	1	1	1	1	1	1	1	1	3	0	0	1	1	0	1	2	2	0
3	1	1	1	1	16	2		3	2	4	3	3	2	1	2	1	1	3	4	3	4		4	3	4	4	4	4	3	3	3	4	4	4	4	1	2	1	1	5	1	1	1	0	0	0	1	0	0
3	2	2	2	1	16	2	1	2			1	2		1	1	1	1	3	5	5	5	5	3	1	4	2										1	1	1	1								0	0	0
3	1	1	1	0	16	2	2	2	2	2	2	2	2	2	2	1	1	3	4	4	4	3	4	4	4	4	4	4	4	4	4	4	4	4	4	1	1	1	1	3	0	0	0	1	0	0	0	0	0
3	1	1	1	0	16	1	1	1	1	1	1	2	1	2	1	1	1	3	5	4	4	4	4	4	4	4	4	3	3	3	3	3	3	3	3	1	1	1	1	2	1	1	1	1	1	1	0	0	0
3	1	1	1	0	16	3	2	3	3	3	3	3	3	1	1	2	1	5	5	4	5	4	4	3	4	4	4	4	4	4	3	4	4	4	3	1	1	1	1	4	1	1	1	0	0	0	0	0	0
3	1	1	1	0	16	3	4		3	4	3	4	3	3	2	1	3	5	5	3	5	4	4	4	4	4	4	4	4	4	3	3	4	3	3	1	1	1	1	5	1	0	1	1	0	1	0	0	0
3	1	1	1	1	16								2	1	2	2	2	4	5	4	4	3	4	4	4	4	4	4	3	3	3	3	3	4	2	1	5	1	1	1	0	1	0	1	0	1	1	0	0
3	1	2	2	1	13	4	4	5	4	4	5	5	3	2	2	1	3	3	5	5	2	4	4	3	4	2	4	4	3	4	3	4	4	4	4	1	1	1	1	5	1	1	1	1	1	1	0	0	0
3	1	1	1	1	16	2	4	5	5	2	3		5	4	5	4	2	4	4	4	4	5	1	3	1	4	2	4	3	2	2	1		4	4	5	3	4	1	4	0	0	0	1	0	0	0	0	0
3	1	2	2	0	16	2	2	3	3	3	4	5	3	3	1	1	2	3	3	3	4	4	4	4	4	4	4	4	4	4	3	4	4	4	4	1	1	1	1	4	1	1	1	1	1	1	0	0	0
5	2	2	2	1	16	4	4	3	3	4	3	5	2	3	3	2	1	3	4	3	3	3	2	2	2	2	2	3	3	2	2	2	2	3	1	1	1	1	1	5	0	1	1	1	1	1	0	0	0
5	1	2	2	1	16	3	3	3	3	4	5	4	4	3	2	3	2	3	5	3	3	3	4	2	4	3	4	3	3		3	4	4	3	3	1	1	1	1	4	1	0	1	1	0	1	0	0	0
3	1	1	1	1	16	2	2	1	2	2	2	3	3	1	1	1	1	3	4	3	3	4	3	3	3	3	3	3	3	3	3	4	4	4	3	1	1	1	1	5	1	1	0	1	0	0	0	0	0
3	1	2	2	0	16	2	3	4					2	2	2	1	1	5	5	4	5	4	4	4	4	4	4	4	4	4	4	4	3	3	3	1	1	1	1	5	1	1	1	1	1	1	0	0	0
3	1	1	1	0	16	2	4	2	3	4	3	5	2	1	1	2	1	5	5	5	5	5	4	4	4	4	4	4	3	3	3	3	4	4	3	1	1	1	1	5	1	1	1	1	1	1	0	0	0
3	1	1	1	0	16	5	5	5	5	5	5	5	4	4	4	4	4	5	5	5	3	4	4	4	4	4	4	3	3	3	4	4	4	4	4	1	1	1	1	5	1	1	1	1	0	0	1	0	0
3	2	2	2	0	16	2	3	5	5	5	3	4	4	1	1	1	1	5	5	3	4	4	2	1	3	2	2	4	4	4	4	4	4	4	4	1	1	1	1	4	1	1	1	1	1	1	0	0	0
3	1	1	1	1	16	3	2	3	2	3	2	3	3	4	3	4	3	3	3	3	3	3	3	3	3	3	3	2	2	2	2	2	2	2	2	3	2	3	2	1							1	0	0
3	1	1	1	0	16	1	3	3	4	2	3	1	3	2	1	1	3	4	5	3	4	3	4	4	4	4	4	4		2	3	4	4	4	2	1	1	1	1	5	1	1	0	0	1	0	0	0	0
5	1	2	2	1	16	5	5	4	5	5	5	5	3	2	2	5	4	3	5	4	3	3	4	4	3	4	4	4	4	4	4	4	4	3	3	1	1	1	1	5	0	1	0	1	0	1	0	0	0
3	1	2	2	0	16	3	4	3	4	4	4	4	3	2	1	1	2	4	4	3	4	3	4	3	4	4	4	4	3	4	4	4	4	3	3	1	1	1	1	4	0	1	1	1	0	1	0	0	0
3	1	1	1	1	16	5	5	5	5	5	5	5	2	1	1	2	5	4	4	4	4	4	4	4	4	4	4	4	4	4	4	4	4		4	1	1	1	1	5	1	1	1	1	1	1	0	0	0
3	1	1	1	1	16	4	5	3	4	5	3	4	2	1	4	1	1	4	5	4	4	4	4	2	1	2	2	4	3	4	4	4	4	3	3	1	2	1	1	4	1	0	0	0	1	1	2	0	0
3	1	2	2	0	16		3	3		2	3		5	5	5	1	1	3	5	3	2	3		1	1	1	1	4	3	4		4	4			1	1	1	1	4	0	0	0	1	0	0	0	0	0
3	1	1	1	0	16	1	2	3	4	4	3	4	3	2	3	2	4	4	5	4	4	4	4	2	4	3	3	3	3	3	3	4	4	4	4	2	3	1	1	4	1	1	0	1	0	1	1	0	0
1	1	2	2	0	16								2	1	1	1	1	4	4	1	4	3	4		2			4	2							2	2	2	2								0		0
3	1	2	2	1	17	2	1	3	3	1	1	1	4	3	4	3	4	3	3	3	3	3	3	3	3	3	3	2	2	2	2	2	2	2	2	4	3	3		1	1	0	1	0	1	0	1	3	0
1	1	2	1	0	18	1	5	5	5	5	5	5	1	1	1	1	1	5	5	5	5	4	4	4	4	4	4	4	4	4	4	4	4	4	4	1	1	1	1	5	1	1	1	1	1	1	0	0	0
3	1	2	1		16
5	1	1	1	0	16	1	4	4	1	1	1	1	3	1	1	1	1	4	4	1	2	3	4	4	4	4	4	4	4	4	4	4	4	4	4	1	1	1	1
3	1	1	1	1	16	1	5	2	2	1	2	4	1	1	1	1	1	4	4	4	4	3	4	3	4	4	3	4	3	4	4	4	4	3	3	1	1	1	1	4	1	1	1	1	0	0	0	0	0
8	1	1	1	1	16	4	5		1	3	2	2		1	3	1	2	3	5	2	2	4	2	3	1	1	2	3	4	4	2	2	3	1	4	3		5	2	5	1	1	1	1	1	1	0	0	0
5	1	1	1	0	16	5	5	5	5	5	5	5	2	1	2	1	1	2	5	4	3	2	4	4	4	4	4	4	4	3	4	4	4	4	3	1	1	1	1	4	0	0	0	1	0	1	1	0	0
3	1	1	1	0	16	5	4	5	5	5	5	5	5	5	5	5	5	4	5	5	4		4	3	4	4	4	4	4	4	4	4	4	4	4	1	1	1	1	5	1	1	1	1	0	1	0	0	0
3	1	1	1	1	17	2	2	3	4	5	4	4	3	4	3	1	1	5	5	4	5	4	4	2	3	3	4	4	3	3	3	3	3	4	3	2	2	1	1	4	0	0	0	1	0	1	2	1	0
7	1	1	2	1	17	2	1	2	1	1	5	4	2	1	1	1	2	4	5	4	4	3	4	4	3	4	4	4	3	1	2	3	2	3	2	1	1	1	1	4	1	1	1	1	0	1	1	0	0
3	1	1	1	1	17								5	5	5	5	5	4	5	4	3	3	4	3	3	4	4	3	3	3	3	3	3	4	3	3	4	1	1	5	1	1	0	1	1	1	1	0	0
3	1	1	1	0	17	3	4	3	4	3	5	5	2	1	1	1	1	3	3	5	2	5	4	4	4	4	4	4	3	1	1	1	1	3	2	1	1	1	1	4	0	0	0	0	0	1	1	0	0
3	1	1	1	1	17	1	1	1	1	1	2	4	3	4	4	2	3	4	5	5	5	4	4	4	4	4	4	4	4	4	4	3	4	3	2	1	3	1	1	5	1	1	1	1	1	1	1	0	0
3	1	1	1	1	16	2	2	4	4	4	4	4	4	3	3	3	2	2	4	3		4	3	2	4	3	4	4	3	3	3	3	3	3	3	1	3	1	1	4	1	1	1	1	0	0	0	0	0
1	1	2	2	1	16	3	1	3	5	3	5	5	1	1	1	1	1	5	3	4	3	4		2			3	3				3	3	3	1	1	1	1	1	5	0	0	0	0	0	0	0	0	0
3	1	1	1	1	16	5	2	5	4	2	5	5	5	2	5	2	2	3	2	1	1	1	3	3	4	3	4	4	4	2	4	4	4	1	2	1	1	1	1	5	1	0	0	0	0	0	0	0	0
3	1	1	1	0	16	2	5	4	4	5	3	3	3	2	2	1	3	4	5	3	3	3	4	3	3	4	4	4	4	3	4	4	4	3	3	1	1	1	1	4	1	1	0	0	0	1	1	0	0
1	1	1	1	1	16	5	5	5	5	5	5	5	2	2	4	1	1		4	4	1	1	4	3	3	3	3	3	3	3	3	3	3	3	3	1	2	1	1	5								0
3	1	1	1	1	16	2	3	4	5	5	5	5	2	1	1	2	1	3	3	4	2	3	4	3	4	2	3	4	1	1	1	1	1	2	1	1	1	1	1	4	1	0	1	1	0	1	0	0	0
3	1	1	1	1	16	3	1	3	4	5	3	4	2	1	1	1	1	4	5	3	5	4	4	4	4	4	4	4	4	4	4	4	4	4	3	1	1	1	1	5	1	0	1	0	0	0	0	0	0
5	2	2	2	0	16	3	4	3	3		1	1	4	1	1	2	1	3	5	3	1	3	3	2	2	3	2	4	3	3	3	3	3	3	3	2	2	2	2	4	0	0	1	1	0	0	1	0	0
3	1	1	1	0	16	3	2	4	3	3	1	3	2	1	1	1	1	3	5	3	4	3	4	2	4	2	4	4	4	3	2	4	3	4	3	1	1	1	1	5	1	1	1	1	1	1	1	0	0
3	1	1	1	0	16	3	3	3	4	4	3	3	2	2	2	2	2	4	4	3	3	3	4	2	3	3	3	4	4	3	3	4	4	4	4	1	1	1	1	3	1	0	0	0	0	0	0	0	0
3	1	1	1	0	16	2		4		4	3	5	4	3	4	1	1	3	4	2	3	2	4	2	3	2	3	4	3	3	4	3	4	3	3	1	2	1	1	3	0	0	0	1	0	1	0	0	0
3	1	1	1	0	16	1	1	4	5	5	1	4	4	2	1	1	1	2	4	1	2	3	4	4	4	4	4	4	3	3	2	4	4	4	4	2	2	1	2	4	1	1	1	1	0	0	0	0	0
3	1	2	1	0	16		4	3		2	3	4	3	2	2	2	2	2	5	4	4	4	4	4		3	4	3	3	3	3	4	4	4	4	1	1	1	1	3	1	0	1	1	0	0	0	0	0
3	1	1	1	1	16				3		4	5	3	2	1	1	2	4	5	5	3	3	4	4	4	4	4	4	3	3	3	4	4	4	4	1	1	1	1	5	1	1	1	1	0	0	0	0	0
3	1	1	1	0	16	2	2	4	4	4	4	4	3	3	2	1	1	4	4	5	4	3	4	3	4	4	3	4	4	4	4	4	4	3	3	1	2	1	2	5	1	1	0	1	0	1	0	0	0
1	2	2	2	1	17		4	4	4	4	3	3	1	1	1	1	1	4	5	5	5	4	4	4	4	4	4	4	3	4	3	3	3	3	3	1	1	1	1		0	0	0	0	0	0	0	0	0
3	1	1	1	1	16	3	4	2	3	1	2	4	2	2	3	1	1	5	5	4	5	5	4	3	4	4	3	4	4	4	3	4	4	4	3	1	2	1	1	4	1	1	0	0	0	0	0	0	0
4	1	1	1	0	#NULL!	1	3	3	3	3	3	3	3	3	3	3	3	5	4	4	4	4	4	4	4	4	4	4	4	4	4	4	4	4	4	1	1	1	1	5	1	1	1	1	1	1	0	0	0
7	1	1	1	1	16	3							3	1	2	2	2						4	3	4	3	4									1	1	1	1	3	0	0	1	1	0	0	1	0	0
5	1	1	1	0	16	4	5	3	3	3	4	3	2	1	1	1	1	3	4	3	3	3	3	2	3	2	4	3	2	2	3	4	4	4	2	1	2	1	1	4	1	0	1	0	0	1	1	0	0
5	1	1	1	1	17
3	1	1	1	1	16	4	3	4	5	5	5	5	1	1	3	1	1	4	4	5	5	4	4	4	4	4	4	4	4	4	4	4	4	4	3	1	1	1	1	5	0	1	1	1	0	0	1	0	0
3	1	1	1	1	16	1	1	1	1	2	1	4	2	1	2	1	1	4	5	3	3	2	4	3	4	3	4	3	3	3	3	3	3	3	3	1	1	1	1	4	1	1	1	1	1	1	1	0	0
3	1	1	1	0	16	5	4	4	4	4	5	5	2	1	1	1	1	2	5	1	1	1	4	4	4	4	4	4	4	3	4	4	4	4	4	1	1	1	1	5	0	1	0	0	0	0	1	0	0
3	1	1	1	1	16	4	4	4	4	4	3	4	3	1	1	1	1	3	3	3	3	2	4	2	3	3	3	4	3	1	1	3	3	3	3	1	2	1	2	5	1	1	1	0	1	0	1	0	0
3	1	1	1	0	16	3	4	5	5	4	4	4	2	2	1	2	1	4	3	2	4	4	3	2	4	3	3	3	4	4	3	3	4	3	2	1	1	1	1	3	1	1	1	0	0	1	0	0	0
3	1	1	1	1	16	2	2			4	3		4	2	3	1	1	4	4	3	4	4	4	4	4	4	4	4	4	4	2	4	4	4	2	1	1	1	1	4	1	1	1	1	0	1	1	0	0
3	1	1	1	0	16	3	4	4	3	3	5	5	3	1	1	1	1	3	5	3	1	3	4	4	4		4	4	4	4	4	4	4	4	4	1	1	1	1	3	1	1	1	0	0	0	0	0	0
3	2	2	2	0	17	3	3	4		4	3	3	4	2	1	1	1	4	5	3	3	3	4	3	4	4	4	4	3	3	3	4	4	4	3	1	1	1	1	4	1	1	0	1	1	0		0	0
3	1	1	1		16	3	3	3	3	3	3	3	2	1	1	1	1	1	1	1	1	1	4	4	4	4	4	4	4	4	4	4	4	4	4	1	1	1	1	5	1	1	1	1	1	1	4	5	4
3	1	1	1	1	16																																			4							0	0	0
3	1	1	1	1	16	3	2	3	3	4	4	4	1	1	1	1	1	4	5	4	4	4	4	3	4	4	4	4	3	3	3	3	3	3	3	1	2	1	2	3	1	1	1	1	0	1	0	0	0
5	1	1	1	0	16	3	4	4	5	5	4	4	5	5	2	1	1	2	5	3	2	2	4	3	1	2	4	4	3	3	4	4	4	4	3	1	1	1	1	4	1	0	0	1	1	1	1	0	0
3	2	1	1	0	16	3	4	4	3	3	3	4	4	3	1	3	1	2	4	1	3	1	3	1	3	3	2	3	3	3	3	3	3	3	2	1	2	1	2	2	0	0	0	0	0	1	0	0	0
3	1	1	1	0	16	3	3	3	3	4	4	4	3	2	1	1	1	4	5	3	4	3	4	4	4	4	4	4	4	3	3	4	4	4	4	1	1	1	1	3	1	1	1	1	0	1	0	0	0
6	1	1	1	0	16																																			5	1	1	1	1	1	1	1
3	1	1	1	0	16	3	5	5	5	5	3	5	4	1	2	2	1	3	4	1	1	1	3	1	3	3	1	4	4	4	4	4	4	4	4	1	1	1	1	5	1	0	0	0	0	1	0	0	0
4	1	1	2	0	16	1	1	1	1	2	2	2	3	1	1	1	1	3	5	3	4	3	4	4	4	4	4	4	4	4	3	4	4	4	2	1	1	1	1	5	1	1	0	0	1	0	0	0	0
1	1	1	1	0	16	3	2	4	4	4	4	4	3	2	2	1	3	3	5	4	4	3	4	3	3	2	3	3	3	3	4	4	4	4	3	1	2	1	2	4	1	1	1	1	0	0	1	0	0
3	1	1	1	0	16	2	2	4	5	5	4	3	3	2	1	1	1	3	5	2	2	2	4	4	3	2	4	4	3	4	2	4	4	4	4	1	1	1	1	5	1	1	1	1	0	1	0	0	0
7	1	1	1	1	16	2	2	3	4	5	4	5	2	2	1	1	1	2	4	4	3	4	3	2	4	4	4	3	4	3	4	4	4	4	3	1	4	1	1	5	1	0	1	1	0	1	1	0	0
3	1	1	1	0	16	2	3	4	4	4	3	3	3	1	1	3	1	4	5	3	4	3	4	3	4	4	4	4	4	4	4	4	4	4	3	1	1	1	1	3	0	1	0	0	1	1	1	0	0
1	1	1	1	0	16	3	2	2	2	2	2	2	3	2	3	3	2	3	5	4	4	3	4	4	4	4	4	3	3	3	3	3	3	3	2	1	1	1	1	5	1	1	1	1	0	0	1	0	0
3	1	1	1	0	16	1	1	1	1	1	1	1	5	5	5	1	1	2	5	4		1	4	4	4	4	4	4	4	4	4	4	4	4	2	1	1	1	1	3	1	0	1	1	0	0	0	0	0
3	1	2	1	0	16	1	1	5	3	1	1	5	1	1	1	1	1	5	1	5	5	5	4	4	4	4	4	4	4	4		4	4	4	4	1	1	1	1	5	1	1	0	0	0	0	0	0	0
5	1	1	1	1	16	3	4	4	4	4	3	3	3	3	1	1	1	4	5	3	4	4	4	3	4	3	4	4	3	3	3	4	4	4	4	1	1	1	1	4	1	1	1	1	0	1	1	0	0
3	1	1	1	1	16	1	2	3	2	3	4	4	4	3	3	3	3	4	5	2	3	2	3	4	4	3	3	4	3	2	3	2	4	4	3	1	1	1	1	5	1	1	1	1	0	0	0	0	0
3	1	1	1	0	17	4	5	4	3	4	5	4	4	3	1	3	1	3	4	1	4	4	4	4	4	4	4	3	4	3	3	2	2	4	3	1	1	1	1	4	1	0	0	1	0	1	1	0	0
3	2	2	2	1	16	1	2	2	2	2	2	2	4	3	3	3	3	3	5	4	2	1	4	2	4	4	4	3	3	3	3	3	3	3	4	1	1	1	1	3	1	1	1	1	1	1	0	0	0
3	1	1	2	0	16	3	5	4	5	5	4	5	5	5	5	5	5	1	5	4	2	1	3	2	3	4	4	3	4	4	4	4	4	4	1	1	4	1	1	4	1	1	0	1	0	0	0	0	0
3	1	1	1	1	#NULL!	3	1	3	1	3	3	3	1	2	2	1	1	3	4	4	3	3	4	4	4	4	4	4	3	4	3	4	4	3	3	1	1	1	1	5	1	1	1	1	0	0	0	0	0
3	1	1	1	0	16	2	2	4	3	4	3	3	1	1	1	1	1	3	5	4	4	3	4	4	4	4	4	4	3	3	3	3	3	3	3	1	2	1	1	5	1	1	1	1	0	1	0	0	0
3	1	1	1	1	16	2	2	4	2	4	5	4	1	1	1	1	1	5	5	2	5	4	4	4	4	4	4	3	3	2	4	4	3	4	4	1	2	1	1		1	1	0	0	1	0	1	0	0
3	1	1	1	0	16	5	2	4	2	1	2	3	2	4	3	2	4	2	5	3	3	1	4	3	4	4	3	4	3	4	3	4	4	4	3	2	2	2	2	3	1	0		0			2	0	0
5	1	2	2	1	16	3	4	4	4	4	4	4	3	3	2	2	2	3	3	2	3	3	3	3	3	3	3	4	3	3	3	3	3	3	3	1	1	1	1	5	0	1	0	0	0	1	0	0	0
3	1	1	1	0	16	3	2	3	3	2	4	5	4	1	1	2	1	1	5	3	4		4	3	4	4	4	4	4	4	4	3	3	4	4	1	1	1	1	5	1	0	0	0	0	0	0	0	0
7	1	1	1	0	16	3	3	5	5	5	3	5	4	3	1	2	1	3	4	2	1	3	4	1	3	1	4	3	4	4	1	4	4	4	3	1	1	1	1	5	0	1	0	0	0	1	1	0	0
3	1	1	1	0	16	3	4	4	5	5	2	3	3	2	3	1	3	4	2	2	3	4	3		4	3	4	2	4	3	2	3		4	4	1	1	1	1	4	1	1	1	0	0	0	0	0	0
3	1	1	1	0	17	3	3	3	5	5	5	5	3	2	1	1	1	3	5	4	1	1	4	4	4	4	4	4	4	4	4	4	4	4	4	1	1	1	1	5	1	1	0	0		1	2	0	0
3	1	1	1	0	17	2	1	4	4	4	2	4	5	5	3	5	5	3	4	3	2	4	4	4	2	2	4	3	4	3	4	4	4	4	3	1	1	1	1	5	1	1	0	1	0	1	1	0	0
5	1	1	1	0	17	2	3	4	3	4	1	3	4	2	2	2	3	4	4	4	4	4	4	4	4	4	4	4	3	3	3	4	4	4	3	1	1	1	1	4	1	1	1	1	0	0	0	0	0
3	1	2	2	0	17	2	3	5	5	3	4		3	3	1	1	1		5	3	3	5	4	4	4	4	4	4	4	4	4	4	4	4	4	2	1	1	1	4	0	0	0	0	0	0	0	0	0
3	1	1	1	0	17	4	4	4	5	5	3	5	3	1	1	3	3	4	5	3	3	5	4	3	4	4	3	3	4	4	3	4	4	3	3	1	1	1	1	5	1	1	1	0	1	1	1	0	0
3	1	1	1	0	17	1	2	2	3	3	2	3	3	3	3	2	2	5	5	5	5	4	4	3	4	4	4	4	4	4	4			4	3	1	1	1	1	4	0	1	0	1	0	0	0	0	0
3	1	2	2	0	17	3	3	3	2	3	3	3	2	1	1	1	1	4	5	5	4	5	4	4	4	4	4	4	3	3	3	4	4	4	4	1	1	1	1	5	1	1	1	1	1	1	0	0	0
5	1	2	2	0	17	3	5	5	5	3	2	3	4	1	1	1	1		5	3	4	5	4	4	4	4	4	4	4	4	4	4	4	4	4	1	1	1	1	4	1	1	1	1	1	1	0	0	0
3	1	1	1	1	17	4	4	4	2	4	4	4	4	3	2	1	2	4	4	4	4	5	4	3	4	4	4	4	4	4	3	3	4	3	3	1	1	1	2	5	1	1	1	0	1	1	1	0	0
3	2	2	2	0	17	3	4	5	5	4	4	3	3	2	4	1	2	3	2	4	3	2	3	2	1	2	4	3	3	2	2	3	4	3	3	1	1	1	1	5	1	1	1	1	1	1	0	0	0
3	1	1	1	1	17	3	5	3	5	4	5	3	1	1	1	1	1	4	5	3	4	4	4	4	4	4	4	4	3	3	3	4	4	4	4	1	1	1	1	5	1	1	1	1	1	1	2	0	0
5	1	1	2	0	17	1	4	4	4	3	3	4	2	1	1	2	2	1	1	3	2	3	4	4	4	4	4	4	4	4	4	4	4	4	1	1	1	1	1	5	1	1	1	1	1	1	0	0	0
3	1	1	1	1	17	1	1	2	2	2	2	2	2	2	2	1	1	4	5	3	4	3	4	2	4	3	3	3	3	3	4	4	4	4	3	1	1	1	1	4	0	0	0	0	0	0	1	0	0
3	1	1	1	1	17	1	2	2	1	1	3	5	1	1	1	1	2	4	5	3	4	4	4	4	4	4	4	4	3	3	3	3	3	4	3	1	1	1	1	5	1	1	1	1	1	1	2	0	0
3	1	2	2	0	17	2	2	3	3	4	3	3	4	4	3	2	1	3	5	4	3	3	3	2	4	3	3	4	3	3	3	4	4	3	3	1	1	1	1	4	1	1	1	1	1	1	0	0	0
3	1	2	2	0	17				5	5	5		1	1	1	1	1			5	4	4	4	4	4	4	4	4						4	4						1		0	0	0		0	0	0
3	1	1	1	0	17	3	3	2	3	2	3	3	5	2	1	2	4	2	1	2	2	2	3	2	4	3	1	4	4	4	4	4	4	4	4	1	1	1	1	5	1	1	1	1	0	0	1	0	0
3	1	1	1	0	17	1	1	3	4	4	3	3	3	2	1	3	2	4	5	4	5	5	4	4	3	3	3	4	3	3	2	4	4	4	4	1	1	1	1	5	1	1	1	1	0	0	1	0	0
3	2	2	2	0	17	3	4	3	4	4	2	2	2	1	1	2	2	3	4	4	3	5	4	3	4	4	4	3	4	4	4	4	4	4	3	1	1	1	1	4	0	1	1	1	1	1	0	0	0
3	2	2	2	0	17	3	4	5	5	5	5	3	5	4	2	3	4	2	4	4	3	5	3	2	2	3	4	4	2	4	4			4	3	1	1	1	1	5	1	1	1	1	0	0	0	0	0
3	1	1	1	1	17	3	3	4	4	4	4	5	2	1	1	1	1	4	4	3	4	5	3	3	3	3	4	4	4	4	4	4	4	4	3	1	1	1	1	5	1	1	0	1	0	0	0	0	0
3	1	1	1	0	17	5	3	5	4	5	5	4	5	4	3	1	1	3	4	4	2	2	4	4	4	4	4	4	4	4	3	4	4	4	3	1	1	1	1	4	1	1	1	1	0	0	0	0	0
3	1	1	1	0	17	3	4	5	5	5	3	3	1	2	3	3	1	2	4	4	4	5	1	1	1	2	3	4	2	2	1	3	2	4	2	1	1	1	1	5	0	0	1	1	0	1	0	0	0
3	1	1	2	0	17	3	2	3	3	4	2	2	3	1	1	1	1	4	4	3	4	4	4	4	4	4	4	4	3	4	3	4	4	4	3	1	1	1	1	4	1	1	1	1	1	1	1	0	0
3	1	1	1	1	#NULL!	2	4	4	3	4	3	4	2	1	1	1	1	5	5	5	5	4	4	4	4	4	4	4	4	4	4	4	4	4	4	1	1	1	1	5	1	1	1	1	0	0	0	0	0
8	1	1	1	0	17	3	2	2	1	4	1	5	2	1	1	1	1	3	5	4	4	5	4	4	3	4	3	4	3	4	3	4	4	4	4	1	1	1	1	4	1	0	1	1	0	1	1	0	0
3	1	2	2	1	18	3	2	3	5	5	3	5	2	2	1	1	2	3	4	4	3	2	3	2	3	3	3	3	2	3	3	2	3	3	3	1	1	1	1	4	1	1	0	1	0	1	0	0	0
5	1	1	1	0	17	3	3	3	2	4	2	4	3	1	1	1	2	1	4	3	3	4	4	3	3	3	4	4	4	4	4	4	4	4	3	1	1	1	1	5	1	1	1	1	0	1	0	0	0
3	1	1	1	1	17	4	3	3	4	4	5	5	3	1	1	2	1	3	5	4	3	3	4	4	4	4	4	4	4	3	2	4	4	4	4	1	1	1	1	4	1	1	0	0	0	1	1	0	0
3	1	1	1	0	18					5	5	5	4	2	2	2	3	3	5	3	3	5						4	4	3		1	4	2	1	1	1	1	1	4	1	0	1	1	0	1	2	3	4
1	2	2	2	0	18	2	2	3	4	4	1	4	5	2	1	1	1	4	3	5	5	4	4	4	4	4	4	3	2	3	4	4	4	2	1	1	1	1	1	5	1	1	1	1	0	0	0	0	0
3	1	2	2	1	18	3	4	3	3	3	5	5	1	1	1	1	1	3	4	5	5	4	4	4	4	4	4	4	4	4	4	4	4	4	4	1	1	1	1	1	1	1	1	1	0	0	0	0	0
3	1	1	2	1	17	3	2	2	3	1	4	4	4	1	1	1	1	2	3	3	2	3	4	4	4	4	4	4	4	4	4	4	4	4	4	1	1	1	1	4	1	1	0	1	0	0	1	0	0
3	1	1	1	1	17	2	2	3	5	5	2	3	4	3	3	1	1	5	5	5	3	5	4	4	4	4	4	4	4	4	4	4	4	4	4	1	1	1	1	5	0	0	1	1	0	0	1	0	0
4	1	2	2	1	17	3	3	4	4	3	4	3	2	1	1	1	1	4	4	4	3	4	4	3	4	3	4	4	4	4	4	4	4	3	1	1	1	1	1	4	1	0	1	1	0	1	0	0	0
3	1	2	2	0	17	1	1	3	5	3	1	1	4	4	3	1	3	4	4	4	3	3	4	3	4	4	4	4	1	1				3	2	1	1	1	1	5	1	1	1	1	1	1	0	0	0
3	1	1	1	1	17	2	4	3	3	4	4	5	2	1	1	1	1	3	4	1	1	3	3	4	4	4	3	3	3	4	2	4	4	4	2	1	1	1	1	4	1	1	0	0	1	1	1	0	0
3	2	1	1	0	17	3	2	4	4	4	4	4	4	1	2	1	1	4	4	5	4	3	4	4	4	4	4	4	4	4	4	4	4	4	4	1	1	1	1	5	1	0	1	0	0	0	1	0	0
3	1	1	1	0	17	1	1	3	4	4			4	4	4	3	1	3	5	5	5	4	4	4	4	4	4	4	3	3	3	4	4	4	4	1	1	1	1	4	1	0	0	1	0	0	1	1	0
3	1	1	1	1	18	5	5	4	4	4	5	4	1	1	1	1	1	5	5	5	5	5	4	4	4	4	4	4	4	4	4	4	4	4	4	1	1	1	1	4	0	0	0	0	0	0	1	0	0
3	1	1	1		#NULL!	2	1	4	3	4	4	5						5	3	5	1	1	2	2	4	4	3	4	2	3		1	4	4	2	1	1	1	1	5	1	1	0	1	0	1	1	0	0
3	1	1	1	0	17	2	4	3	4	4	3	3	3	3	1	1	1	4	4	2	2	3	3	3	4	4	4	4	4	4	4	4	4	4	3	1	1	1	1	4	1	1	0	0	1	0	1	0	0
3	1	1	1	1	17	3	4	4	4	4	4	4	5	2	2	2	3	4	5	3	3	4	3	3	3	4	4	4	3	3	3	4	4	4	4	1	1	1	1	5	1	1	1	1	0	1	2	0	0
3	1	1	2	1	17	4	5	5	5	5	5	5	2	1	1	1	1	3	4	4	3	3	3	2	3	3	4	4	3	4	4	4	4	4	4	1	1	1	1	4	1	1	1	1	0	1	1	0	0
3	2	2	2	1	18	2	1	5	2	2	1	5	1	1	1	1	2	5	5	5	5	5	4	3	3	4	4	4	4	4	4	4	4	3	2	1	1	1	1	5	1	0	0	0	0	0	0	0	0
4	2	2	2	0	17	3	4	4	4	4	3	3	2	1	1	2	1	3	2	3	3	3	2	4	3	3	4	3	3	3	3	4	4	4	4	1	1	1	1	4	1	1	1	1	0	1	1	0	0
3	1	1	1	1	17	3	4	4	5	5	3	3	4	2	3	2	2	5	5	4	5	4	4	2	3	3	4	4	4	3	3	4	4	4	4	1	1	1	1	5	1	0	1	1	0	0	1	0	0
5	1	1	1	0	17	2	2	4	3	4	3	3	3	3	2	1	1	3	4	3	3	4	4	4	4	4	4	4	3	3	2	4	4	4	3	1	1	1	1	4	1	0	0	1	0	0	0	0	0
3	1	1	1	1	17	1	5	4	1	2	3	5	1	1	1	1	1	1	5	3	2	3	4	3	4	4	4	4	3	4	4	4	4	4	4	1	1	1	1	3	0	1	0	0	0	1	2	0	0
5	2	2	1	1	17	3	5	1	2	1	4	5	2	1	1	1	1	3	3	5	4	5	4	3	3	3		4	4	2	4	4	4	4	3	1	1	1	1	5	0	0	0	1	0	1	0	0	0
3	1	1	1	0	17	5	5	5	3	5	3	5	5	4	3	5	5	1	3	3	3	1	4	2	4	4	4	4	4	4	2	4	4	4	3	1	1	1	1	5	1	1	0	1	1	0	0	0	0
3	1	1	1	1	17	1	1	4	4	4	2	3	1	1	1	1	1	4	5	4	3	3	4	3	4	4	4	4	3	3	3	4	4	4	3	1	1	1	1	4	1	1	1	1	1	1	1	0	0
3	1	1	1	1	17	1	2			2	1	4	3	1	1	2	1	5	5	5	4	5	4	4	4	4	4	4	4	3	4	4	4	4	4	1	1	1	1	5	1	1	1	1	0	1	0	0	0
3	1	1	1	1	17	1	1	3	3	3	3	3	2	2	2	2	2	4	4	3	3	2	4	4	4	4	4	4	4	4	4	4	4	4	4	1	1	1	1	3	1	1	1	1	0	0	0	0	0
7	1	1	1	0	17	2	4	3	3	3	2	2	4	1	3	1	2	4	5	3	3	4	4	4	3	4	4	4	2	2	2	4	4	4	2	1	1	1	1	4	1	1	1	1	0	1	1	0	0
5	1	1	1	0	17	2	2	1	5	4	1	5	4	1	1	2	1	4	5	4	5	5	4	4	4	4	4	4	4	3	4	4	4	4	3	1	1	1	1	4	1	0	0	1	0	1	1	2	0
4	1	1	1	1	17	3	4	4	3	2	4	4	5	4	4	1	1	4	4	3	4	4	4	3	4	4	4	3	3	2	3	3	3	3	3	1	1	1	1	4	1	0	1	1	0	0	0	1	0
3	1	1	1	1	17	3	3	5	5	5	3	5	4	4	3	4	3	3	3	3	4	4	4	2	3	3	2	4	3	4	4	4	4	4	3	1	1	1	1	4	1	1	1	0	0	0	0	0	0
3	1	2	2	0	17	5	5	5	5	5	5	5	3	4	2	4	2	3	5	5	3	1	4	4	4	4	4	3								1				1	0	1	1	1	0	1	0	0	0
3	1	1	1	1	18	4	4	3	1	5	1	3	5	5	5	1	5	4	4	5	4		2	1	1	1	1	3	4	4	4	4	4	4	4				5	5	1	1	1	1	0	1	1	0	0
5	1	1	1	1	16	5	5	3	5	4	5	5	1	2	1	3	1	4	4	3	3	3	4	4	3	3	4	4	4	4	4	4	4	4	2	1	1	1	1	5	1	1	1	1	1	1	0	0	0
3	2	2	2	1	16	2	5	5	5	5	3	4	4	2	2	1	1	3	2	1	3	4	2	1	4	4	3	2	3	4	4	4	4	4	2	1	1	1	1	5	0	1	0	1	1	1	1	0	0
5	1	2	1	1	17	3	4	3	4	4	4	3	4	3	4	2	2	4	4	5	4	4	4	3	2	3	4	4	3	4	3	4	3	3	3	1	2	1	1	4	1	1	0	0	0	0	0	0	0
3	1	1	1	1	17	3	4	3	3	3	4	4	3	2	2	1	1	4	3	3	3	3	4	3	4	4	3	3	3	4	4	3	4	3	2	1	1	1	1	5	1	0	0	0	1	0	0	0	0
3	1	2	1	1	17	4	4	3	3	4	5	4	3	4	5	1	3	3	5	5	4	3						4	4	4	3	4	4	4	4	1	1	1	1	3	0	0	1	1	0	1	0	0	0
3	1	1	2	1	17	2	2	2	4	2	4	5	3	2	1	2	3	4	5	5	3	2	4	4	3	3	3	4	3	3	3	4	4	4	3	1	2	1	1	3	0	1	0	0	0	1	0	0	0
3	1	1	1	1	16	1	5	3	4	4	3	3	1	1	1	1	1	5	5	3	4	3	4	4	4	4	4	4	4	4	4	4	4	4	3	1	1	1	1	4	1	0	0	0	0	0	0	0	0
3	1	1	1	1	17	2	1	2	3	4	4	4	4	4	4	2	4	4	5	5	5	5	4	2	4	4	4	4	3	4	3	4	4	4	3	1	1	1	1	5	1	1	1	1	1	1	2	0	0
3	1	1	1	1	17		5	2			4	4	3	1	1	3	1	4	5	3	4	4	4	3	4	4	4	3	3	3	3	4	3	4	2					5	1	0	1	0	0	0	1	0	0
3	1	1	1	1	17	3	4	5	4	4	5	5	2	1	1	1	1	4	5	4	4	1	4	4	4	4	4	4	4	4		4	4	4	4	1	1	1	1	1	0	1	1	1		0	0	0	0
3	1	1	1	1	17	1	1	3	3	3			1	1	2	1	1	4	4	4	4	4	4	3	3	3	3	4	3	3	3	4	4	4	4	1	1	1	1	4	1	1	1	0	1	0	0	0	0
3	1	1	1	0	17	3	3	5	4	3	4	5	3	4	2	3	3	4	4	3	4	4	4	3	4	3	3	4	3	3	3	4	4	4	3	1	1	1	1	4	0	1	0	0	1	1	1	1	0
3	2	2	2	1	17	4	2	3	2	4	3	2	2	2	4	3	5	4	4	3	3	1	1	3	4	2	3	4	3	2	2	3	2	1	2	5	3	1	3	5	0			1	1	1	0		4
3	2	2	2	0	17	2	2	3	2	3	3	4	3	2	1	1	1	4	4	3	4	4	4	3	3	3	4	4	4	4	4	4	4	3		1	1	1	1	4	1	1	1	0	0	0	0	0	0
4	1	1	1	0	17	2	3	5	3	5	3	3	5	4	4	2	1	3	3	4	4	4	2	1	3	2	1	3	4	4	4	4	4	4	4	1	1	1	1	3	1	0	1	1	0	0	0	0	0
5	2	2	2	1	17	2	4	4	4	4	2	4	3	1	1	1	1	4	5	5	4	4	4	4	4	4	4	4	4	4	4	4	4	4	3	1	1	1	1	5	1	1	1	1	0	0	0	0	0
3	1	1	1	0	17	3	1	4	4	4	5	5	3	3	2	1	3	3	4	4	4	5	4	3		4	4	4	4	4	4	4	4	4	4	1	1	1	1	5	1	1	1	1	0	0	0	0	0
5	1	1	1	0	17	3	3	3	4	4	4	3	3	2	2	1	2	4	4	4	3	3	4	4	3	3	4	4	3	3	3	4	4	4	2	1	1	1	1	4	1	1	1	1	1	0	0	0	0
3	2	2	2	1	17	2	3	4	4	4	3	3	3	1	2	2	2	2	4	4	3	2	3	1	2	2	2	3	2	2	2	1	1	2	1	1	1	1	1	4	1	1	1	1	0	0	0	0	0
5	1	1	1	0	17	3	4	4	4	4	4	4	3	2	1	1	1	3	5	4	3	2	4	4	4	4	4	3	3	3	3	4	4	4	4	1	1	1	1	4	1	0	1	0	0	1	0	0	0
3	1	1	1	0	17	2	2	3	2	3	2	3	2	2	1	1	2	4	4	4	4	3	4	4	4	4	4	4	3	3	3	4	4	3	3	1	1	1	1	4	1	0	1	1	0	1	0	0	0
4	2	2	2	1	18	3	5	5	5	4	3	4	2	2	1	2	1	4	5	5	3	4	4	3	3	3	3	3	3	4	2	4	4	4	3	1	1	1	1	5	1	1	1	1	1	1	0	0	0
3	1	1	1	0	17	2	3	4	4	4	5	3	3	4	2	3	3	3	3	4	5	5	4	4	4	4	4	4	3	4	4	4	4	4	4	1	1	1	1	5	1	1	0	1	1	0	0	0	0
5	2	2	2	1	17	1	5						2	1	1	1	1	4	5	5	4	4	4	4	3	4	4	4	4	3	4	4	4	3	3	1	1	1	1	5	1	1	1	1	0	0	1	0	0
5	2	2	2	1	16	3	2	3	4	4	3	3	1	1	1	1	1	2	3	3	2	4	3	1	3	2	3	3	3	3	3					3	3	3	3	5	1	1	1	1	0	0	0	0	0
3	1	1	1	0	17	1	1	5	5	5	1	5	2	1	1		1	5	5	5	5	3	4	4	4	4	4	4	4	4	4	4	4	4		1	1	1	1		0	0	0	1	0	0	0	0	0
3	1	1	1	1	16	2	4	4	3	3	4	3	2	3	2	1	2	4	3	2	3	2	4	4	4	4	4	3	3	3	3	4	4	4	4	1	1	1	1	4	1	1	1	0	0	1	0	3	0
7	1	2	1	0	16	1	1	3	3	4	3	1	1	1	1	2	1	1	5	3	2	3	4	3	3	2	2	3	3	3	3	4	4	4		1	1	1	1	5	1	1	0	0	1	1	1	5	4
4	1	1	1	1	16	1		5	3	3	3	3	2	1	2	2	1	3	4	1	3	3	4	4	4	4	4	4	4	3	3	2	2	3	2	1	1	1	1	4	0	0	0	0	0	1	0	0	0
3	1	1	1	1	17	3	3	3	3	3	3	4	4	2	4	1	1	5	5	4	4	3	4	1	2	1	1	3	2	1	1	1	1	1	1	1	1	1	1	5	1	0	0	1	0	0	0	0	0
5	1	2	2	1	16	2	2	5	2	5	3	5	5	4	3	1	1	2	5	3	1	1	4	3	4	4	4	4	4	3	1	3	3	4	4	1	1	1	1	4	1	1	1	1	0	1	0	0	0
3	2	2	2	1	16	3	3	3	3	3	3	3	2	1	3	3	2	5	3	5	5	1	3		4	3	2	2	3	1	1	2	3	2	3	3	3	3	3
3	1	1	1	1	16	3	4	4	4	4	4	3	2	2	2	2	2	2	5	3	5	3	4	3	4	4	4	4	3	3	3	4	4	4	3	1	1	1	1	4	1	1	1	1	0	1	1	0	0
3	1	1	1	1	16	3	4	4	5	5	3	5	1	2	2	1	1	3	5	1	3	3	4	3	4	4	4	4	3	3	3	2	4	2	1	1	1	1	1	5	1	1	0	0	0	0	0	0	0
3	1	1	1	1	16	1	2	4	5	5	2	4	2	1	1	1	1	3	4	2	1	1	4	2	4	3	3	4	4	4	4	4	4	4	3	1	1	1	1	5	0	0	0	0	0	0	0	0	0
5	1	2	2	0	17	1	1	4	5	5	4	4	2	1	1	2	2	3	4	5	4	5	4	4	4	4	4	3	4	3	4	4	4	4	4	1	1	1	1	4	1	1	0	1	1	1	0	0	0
3	2	2	2	0	16	3	4	3	4	3	2	2	1	1	1	2	2	5	4	5		5			4	4	4		3	4	3			3	3	2	2	2	2	5	1	1	1	1	0	0	0	0	0
6	1	1	2	1	16	3	3	2	3	3	3	3	1	1	4	1	1	4	5	4	3	5	2	1	1	1	1	3	2	1	1	3	3	3	2	1	1	1	1	4	1	0	1	0	0	1	0	0	0
5	1	1	1	1	16	3	4	3	4	4	4	4	1	1	1	1	1	3	4	5	3	3	3	3	3	3	3	4	4	4	4	4	4	4	2	1	1	1	1	4	1	0	0	0	0	0	0	0	0
3	1	1	1	0	16								4	4	2	3	2	3	3	2	4	3	4	4	4	4	4	4	3	3	4	4	4	4	4	2	2	1	1	5	0	1	0	1	0	1	1	0	0
3	1	2	2	1	#NULL!	1	1	5	5	5	5	1	4	1	1	3	1	3	5	5	5	3	4	4	3	4	4	3	4	4	4	4	4	4	4	1	1	1	1	5	1	1	1	1	1	0	0	0	0
3	1	2	2	1	16	3	3	3	3	3	3	3	4	4	1	3	3	3	4	3	4	2	4	3	4	3	4	3	3	3	3	3	3	3	3	1	1	1	1		1	1	1	1	1	1	0	0	0
3	2	2	2	0	17	3	4	4	3	1	4	1	4	4	3	3	4	1	5	4	5	5	4	2	4	4	4	3	3	3	3	3	3	3	3	1	1	1	1	5	1	1	0	1	1	1	0	0	0
3	1	2	2	0	18	4	3	4	3	3	4	3	3	1	1	2	2	3	5	3	2		3	4	3	3	4	3	3	3	4	3	3	4	4	1	1	1	1	5	1	1	0	1	1	0	0	0	0
3	1	2	1	0	17	3	4	3	5	4	4	3	5	4	3	2	2	4	5	5	4	4	4	3	3	4	3	3	4	3	3	4	4	4	4	2	2	2	2	5	1	1	1	1	1	1	0	0	0
3	1	1	1	1	16	5	1	5	5	5	5	5	1	2	3	4	5	1	5	1	1	1	4	4	4	4	4	3	3	3	3	3	3	3	3	5	5	5	5	1	1	1	1	1	1	1	4	5	4
3	1	1	1	1	16	5	4	4	3	3	3	3	5	4	4	4	3	3	3	3	3	5	4	4	3	4	4	3	2	3	3	3	4	4	3	4	3	3	4	5	0	0	0	0	0	0	1	5	0
4	1	1	1	0	16	3	4	5	4	5	5	5	3	2	2	3	3	4	5	3	4	4	4	3	4	4	3	4	3	3	4	4	4	4	3	2	2	2	2	5	1	1	0	1	0	1	1	1	0
3	1	1	1	0	16	4	3	3	5	4	3	5	3	2	1	1	2	2	5	3	4	3	4	4	4	4	4	4	3	3	3	3	3	4	3	1	1	1	1	4	1	0	1	1	0	1	1	1	0
5	2	2	2	0	16	4	2	4	4	4	3	4	5	3	4	2	2	3	4	1	3	3	3	2	4	3	3	3	3	2	3	4	3	4	4	1	1	1	1	4	1	1	1	1	0	0	0	0	0
3	1	2	2	1	16	4	2	5	4	4	5	4	4	2	5	3	2	2	5	3	2	2	4	1	2	3	2	3	3	3	3	2	4	3	3	1	1	1	1	5	1	0	1	0	0	1	0	0	0
6	1	1	1	1	16	2	4	4	4	4	4	4	3	2	2	1	2	3	2	3	1	1	3	4	3	3	4	3	3	3	3	3	2	3	3	1	1	1	1	4	1	1	1	1	0	0	1	2	2
8	2	2	2	1	#NULL!	2	3	3	3	3	3	4	4	2	2	2	1		3	1	4	4	2	4	4	4	4	4	4	4	4	3	3	4	2	1	1	1	1	5	0	1	0	1	0	1	0	0	0
3	1	1	1	0	16	2	2	3	5	4	4	4	3	1	1	2	1	5	5	1	3	4	3	1	4	2	2	4	4	4	4	4	4	4	2	1	1	1	1	5	1	1	1	1	0	1	0	0	0
4	1	1	1	0	16	3	5	5	5	4	3	3	4	4	3	3	1	3	2	5	2	5	2	1	3	1	2	3	3	2	2	4	4	4	3	1	2	1	1	4	0	1	0	0	1	0	1	0	0
3	1	1	1	1	16	3	3	3	3	3	5	5	3	1	1	2	2	1	5	3	3	3	3	3	3	3	3	4	3	3	3	3	3	3	3	1	1	1	1	5	0	0	1	1	1	1	1	0	0
5	1	1	1	1	17	1	4	5	3	3	1	5	1	1	1	1	1	5	5	4	5	5	4	4	4	4	4	4	3	1	1	4	4	3	3	1	1	1	1	5	1	1	0	1	1	1	1	0	0
5	1	1	1	0	16		3	4	4	4			3	1	1	1	2	2	5	3	1	3	4	4	4	4	3	4	3	4	4	4	4	4	4	1	1	1	1	4	1	0	0	0	0	0	1	0	0
3	1	1	1	0	16	3	3	5	5	4	4	5	5	5	5	5	2	3	4	1	3	2	4	2	4	3	3	4	3	3		3	3	4	4	1	1	1	1	5	1	0	1	1	0	0	0	1	0
1	1	1	1	1	16				3	3	3	3						3	4	3	3	3	4	4	4	3	4	4	3	3	3	4	3	4	4	3	3	3	3								0	0	0
6	2	2	2	1	16	3	5	5	1	5	5	3	4	1	1	1	1	1	2	1	3	1	1	1	2	3	2	3	4	4	4	4	4	1	1	1	1	1	1	4	0	0	1	1	1	0	0	0	0
3	1	1	1	0	16	3	3	5	5	5	3	4	2	1	1	1	1	3	4	3	4	3	4	4	4	4	4	4	3	4	4	4	4	4	4	1	1	1	1	5	1	1	0	0	0	0	0	0	0
3	1	2	2	0	16		3	5	5	5	4	3	3	3	1	1	1	4	4	4	3	4	4	4	4	4	4	3	3	4	4	4	4	4	4	1	1	1	1	5	1	1	1	1	0	0	0	0	0
4	1	1	2	0	16	4	2	4	4	3	4	3	4	2	3	2	3	4	4	3	4	5	4	3	4	4	4	4	3	3	4	3	4	4	3	2	3	1	1	4	1	1	1	1	0	1	2	1	0
3	1	1	1	1	16	5	4	4	5	4	4	3	1	2	1	1	1	3	5	5	4	4	3	3	4	4	4	4	3	3	1	4	4	4	4	2	1	1	1	5	0	0	1	0	0	1	0	0	0
3	1	2	2	0	18	3	3	2	3	2	3	3	2	1	1	1	3	2	1	3	1	1	4	3	4	4	4	3	2	2	2	3	2	2	2	1	1	1	1	4	1	1	0	0	1	1	0	0	0
3	1	1	1	0	16	1	1	5	5	5	5	5	4	1	1	3	1	3	5	3	4	3	4	4	4	4	4	4	4	4	4	4	4	4	3	1	1	1	1	5	1	1	1	1	0	1	0	0	0
1	1	2	2	1	16	2	3	2	3	2	3	2	2	3	1	2	2	4	3	3	4	3	4	3	4	4	4	3	3	3	3	4	3	3	3	1	1	1	2	4	1	1	1	1		0	0	0	0
3	1	1	1	1	16	4	4	4	5	5	5	3	1	3	2	1	1	3	4	5	3	4	4	3	3	4	4	3	3	3	3	4	4	4	4	1	1	1	2	4	1	0	1	0	0	0	1	0	0
3	1	1	1	0	16	3	3	4	4	4	3	3	5	5	5	3	3	2	4	2	4	4	2	1	3	3	2	3	3	3	3	4	4	4	3	1	1	1	1	4	1	1	0	1	0	0	0	0	0
5	1	1	1	0	16	2	4	4	4	3	3	3	4	4	1	3	1	1	5	3	3	2	4	4	3	3	3	4	4	4	4	4	4	4	3	1	1	1	1	5	1	1	0	0	1	1	2	1	0
3	1	1	1	1	#NULL!	4	4	4	4	5	4	4	2	1	1	1	1		3	4	3	3	4	3	3	3	4	3			3	3	3	3		1	1	1	1	5	1	1	1	1	1	0	1	0	0
3	1	1	1	0	16	2	3	3	4	5	3	4	4	3	1	1	1	3	4	2	2	3	4	3	2	3	3	4	4	4	3	4	4	3	3	1	1	1	1	5	1	1	1	1	0	0	0	0	0
5	1	2	2	0	16	1	5	4	4	5	4	3	5	2	1	3	1	3	5	2	3	5	4	4	3	3	4	4	4	4	4	3	4	4	3	1	1	1	1	5	0	1	0	0	0	0	1	0	0
3	1	1	1	0	16	2	3	3	3	4	4	4	3	2	1	1	1	3	4	3	3	2	4	4	4	4	4	4	3	3	3	4	4	4	4	1	1	1	1	4	1	1	1	0	1	1	0	0	0
4	1	1	1	0	16	2	3	3	4	4	3	4	4	3	1	1	1	3	4	2	3	4	3	3	3	3	3	4	4	4	4	4	4	3	3	1	1	1	1	5	1	1	1	1	0	0	0	0	0
3	1	1	1	0	16	3	4	4	4	4	4	4	4	3	2	1	4	2	5	3	3	3	3	2	3	3	3	4	3	3	4	4	4	4	4	1	1	1	1	3	1	0	0	0	0	0	0	0	0
3	1	1	1	0	16	2	4	2	4	3	3	3	2	2	1	1	3	3	5	2	3	3	4	1	1	1	3	3	3	4	4	4	4	3	1	1	1	1	1	4	1	0	0	0	0	0	0	0	0
3	2	2	2	1	18	1	3	3	5	4	3	2	1	1	1	1	1	5	5	3	5	4	4	3	4	4	4	4	4	4	4	4	4	4	4	1	1	1	1	5	1	1	1	1	0	1	0	0	0
3	1	1	1		16	3	4	4	4	5	4	3	5	5	5	5	1	5	5	3	5	3	4	3	3	1	4	4			1	1	1	3	3	1	1	1	1	2	1	1	1	1	0	0	0	0	0
5	1	2	2	0	17	1	1	2	1	4	1	1	4	2	4	1	1	4	4	3	2	1	4	2	3	2	4	3	4	4	3	4	4	4	3	1	1	1	1	5	1	1	0	1	1	1	0	0	0
5	2	2	2	1	17	3	2	4		4	4	5	5	3	2	1	1	4	5	3	3	3	4	3	3	4	3	3					3	3		1	2	1	1	4	1	1	1	1	0		0	0	0
3	1	1	1	1	16	4	4	4	3	3	3	5	2	3	1	1	4	3	5	3	3	4	4	4	4	4	4	3	2	3	2	3	1	4	1	1	1	1	3	3	1	0	0	0	0	0	0	0	0
3	1	1	1	1	16	3	5	4	3	4	4	5	3	1	2	1	4	2	2	4	3	3			2	3	3	3				4	3	4	3	1	1	1	1	4	1	0	1	0	0	0	0	0	0
1	2	2	2	1	16	3	4	5	5	5	5	4	4	3	1	1	1	2	5	4	4	4	4	3	4	4	4	3	3	2	1	1	1	3	2	1	1	1	1	5	0	1	1	0	1	1	0	0	0
5	2	2	2	0	16	1	2	3	3	3	2	2	2	1	1	1	1	3	4	3	4	3	3	3	3	3	3	3	3	3	4	3	3	4	3	1	1	1	1	4	1	1	1	1	0	0	0	0	0
3	1	1	1	0	16	3	4	4	3	4	3	3	4	3	1	1	1	3	5	2	3		4	2	4	4	3	4	3	3	3	2	3	4	3	1	1	1	1	2	1	1	0	0	0	0	1	0	0
3	1	2	1	0	16	3	4	4	4	4	4	4	3	2	1	1	1	2	5	3	3	3	4	4	3	3	3	4	3	2	3	4	4	4	4	1	1	1	1	2	1	0	0	0	0	0	0	0	0
3	1	1	1	0	16	2	4	4	4	4	3	3	3	3	1	1	1	3	5	3	2	4			3	2	2	3	4	4	4	4	4	4	4	1	1	1	2	2	0	0	1	0	0	0	1	0	0
3	1	1	1	0	#NULL!	4	5	4	5	4	5	3	2	1	1	1	1	2	5	3	5	4	4	3	4	4	4	4	3	3	3	4	4	4	4	1	1	1	1	4	1	1	1	1	0	0	0	0	0
5	1	2	2	1	16	4	3	2	3	3	3	3	4	3	2	2	3	3	4	3	3	2	3	3	3	3	3	3	3	3	3	4	4	4	4	1	1	1	1	5	0	0	1	1	0	1	0	0	0
3	1	1	1	1	16	3	4	5	5	5	5	5	3	3	3	1	2	2	5	3	4	2	4	4	4	4	4	2	4	4	3	4	4	4	4	2	2	2	2	4	1	1	0	0	0	0	0	3	1
3	1	1	1	0	16	2	2	4	4	4	2	2	2	1	1	1	1	4	5	4	4	4	4	4	4	4	4	4	4	4	3	3	4	4	3	1	1	1	1	4	1	1	1	1	1	1	1	0	0
3	1	2	2	0	16	2	5	3	4	4	3	2	2	1	1	3	1	3	4	3	4	5	4	4	4	4	4	4	3	2	3	4	4	4	3	1	1	1	1	3	1	1	0	0	0	1	0	0	0
5	1	1	2	1	17	1	1	2	2	3	2	3	3	1	3	2	2	5	5	3	3	3	4	4	4	3	4	4	4	4	4	4	4	4	3	1	1	1	1	4	1	0		1	0	1	0	0	0
3	1	1	1	1	16	3	4	3	3	5	4	4	2	1	1	1	1	4	5	2	2	3	3	2	3	3	4	4	3	3	3	4	4	4	4	2	2	1	1	3	0	0	1	1	0	1	0	0	0
3	1	1	1	1	16	5	5	4	5	5	5	5	4	2	2	1	3	1	5	2	2	2	4	3	4	4	4	4	4	4	3	4	4	4	3	1	2	1	1	5	1	1	0	1	1	1	2	0	0
3	1	1	1	1	16	3	4	4	2	4	4	4	2	3	2	1	1	3	4	4	5	2	4	3	4	4	4	4	4	3	4	4	4	3	4	1	1	1	1	5	0	1	1	1	0	0	0	0	0
3	1	1	1	0	16	3	3	3	3	3	3	4	1	1	1	1	1	1	3	3	2	3	4	3	4	4		4	3	3	3	4	4	4	3	1	1	1	1	5	1	1	1	0	0	0	0	0	0
3	1	1	1	0	16	1	3	3	3	2	3	2	3	5	5	3	1	5	5	4	5	5	3	3	4	3	3	4	3	3	3	4	4	4	3	1	1	1	1	5	1	0	0	0	0	0	0	0	0
5	1	1	1	0	16	3	1	3	3	4	3	3	5	4	5	5	5	3	3	3	2	3	2	2	3	1	1	3	3	3	3	3	3	2	2	1	1	1	1	5	0	0	0	0	0	0	1	0	0
4	1	1	1	0	16		4	3	4		1	2	3	2	1	1	1	5	4	3	4	3	1	1	1	1	1	4	4	4	4	4	4	4	4	1	1	1	1	5	1	1	0	1	0	0	1	0	0
3	2	2	2	1	16	4	2	3	3	2	2	4	2	1	1	1	1	3	3	4	3	2	3	2	2	2	3	3	3	3	3	3	3	3	2	2	2	1	1	4	1	1	0	1	0	0	0	0	0
3	1	1	1	0	16	5	5	5	5	5	5	5	4	1	1	5	1	1	5	2	1	4	4	3	1	1	4	3	3	3	3	4	4	4	3	1	1	1	1	5	1	1	0	1	0	0	2	1	0
1	1	1	2	0	16	4	4	4	5	5	4	1	3	2	3	1	1	4	4	2	3	4	3	3	3	3	3	4	4	3	3	4	3	3	3	1	1	1	1	5	1	1	0	1	0	0	2	0	0
7	1	2	1	0	16	3	3	3	4	3	4	3	2	1	2	2	2	3	5	3	4	4	3	2	3	3	3	3	2	1	2	2	2	3	2	1	1	1	1	4	1	0	0	1	0	0	2	5	1
3	1	1	1	1	16	2	2	3	3	4	3	4	2	1	1	1	1	3	4	3	4	4	4	4	4	4	4	4	4	4	3	4	4	4	3	1	1	1	1	4	1	0	1	1	0	0	0	0	0
3	1	1	1	0	16	3	4	5	5	5	3	3	5	3	1	1	1	4	3	1	2	1	3	1	4	4	3	4	3	4	4	4	4	4	4	1	1	1	1	4	0	0	0	0	0	0	0	0	0
3	1	1	1	1	16	1	1	3	4	2	1	3	3	1	2	1	1	3	4	5	2	1	4	3	3	3	4	3	3	3	2	4	4	4	3	1	2	1	3	4	1	1	1	0	0	1	0	0	0
3	1	1	1	0	16	4	5	5	4	5	3	4	5	5	4	5	3	3	1	1	1	2	4	1	4	3	2	4	4	4	3	4	4	4	4	1	1	1	1	4	0	1	1	1	1	1	1	2	1
3	2	2	2	0	16	2	3	3	4	4	3	3	2	1	1	2	1	3	5	3	4	4	4	3	4	4	4	4	2	3	3	4	4	4	3	1	1	1	1	5	1	1	1	1	1	1	0	0	0
3	1	1	1	0	16	4	4	4	4	5	3	3	2	1	2	1	1	3	4	3	2	3	2	1	4	3	4	3	3	3	3	4	4	4	2	1	1	1	1	4	1	1	1	1	0	0	0	0	0
5	1	2	2	1	16	2	4	4	4	4	4	4	4	4	4	5	5	3	4	3	4	4	4	3	3	4	4	2	3	3	3	3	3	3	3	3	2	2	2	4	1	0	0	0	0	0	0	0	0
3	1	1	1	1	17	2	2	2	2	2	2	1	5	3	4	5	2	3	2	3	1	3	1	2	4	4	2	1	3	1	3	2	4	2	1	2	5	4	2	5	0	0	0	0	0	0	0	0	0
1	1	1	1	0	16	4	3	5	5	5	5	5	5	2	2	1	2	1	5	1	1	1						4	4	4	4	4	4	4	2	1	1	1	1	5	1	1	1	1	0	0	0	1	0
3	1	1	1	1	16	4	5	3	3	3	3	1	1	2	2	2	2	3	5	3	4	3	4	4	4	4	4	4	4	4	4	4	4	4	4	1	1	1	1	2	1	1	1	1	1	1	0	0	0
3	1	2	2	0	16			1		2	1	1	1	1	1	1	1	3	2	2	2	2	4	4	4	4	3	3				3	4	4	4	1	1	1	1	5	1	0	1	0	0	0	0	0	0
7	1	1	2	1	16	3	3	4	5	5	5	4	4	1	5	1	1	4	4	2	3	3	3	3	4	4	4	3	3	3	3	3	3	3	2	1	1	1	1	5	1	0	0	1	0	0	0	1	0
1	1	1	1	1	16													1			1	1														1	1	1	1	5	0	1		0	1	0	0		0
3	1	2	2	0	16	4	5	5	5	5	4							3	5	4	3	5	4		4	4	4	4	4	4	4	4	4	4	4	1	1	1	1	5	1	1		0	0	0	0	0	0
3	1	1	1	0	16	4	5	5	5	5	5	5	5	2	2	1	1	3	5	1	3	3	3	1	2	2	2	4	4	4	3	4	4	4	4	1	1	1	1	4	1	0	0	0	0	0	0	1	0
7	1	1	1	0	16	2	4	4	5	5	4	5	3	3	2	2	3	3	4	3	2	3	4	2	3	3	4	3	3	3	3	4	4	3	2	1	1	1	1	5	1	0	1	1	0	0	1		1
5	1	1	1	1	17	3	3			3	3	2						5	4	3	3	3						4	4							1	1	1	1	4	1		1	1			0	0	0
3	1	1	1	1	16	3	3	4	2	3	3	4	3	2	3	1	1	4	5	2	1	1	4	3	4	4	4	4	3	3	3	3	3	3	3	1	1	1	1	4	1	0	0	1	0	0	1	0	0
4	1	1	1	1	16	5	4	4	3	4	3	2	3	3	3	2	1	4	5	3	4	4	4	3	4	4	4	4	4	4	4	4	4	3	3	3	2	4	3	4	0	1	0	1	0	0	0	0	0
5	1	1	1	0	16	3	5	2	3	1	4	3	4	1	2	2	2	3	4	4	3	2	4	4	2	4	4	4	4	4	4	4	3	4	4	1	1	1	1	4	1	1	1	1	0	0	0	0	0
3	1	1	1	1	16	3	3	4	5	5	4	5	5	3	4	1	5	4	4	2	3	3	4	2	2	2	4	4	4	4	4	4	4	4	4	1	1	1	1	4	1	1	1	1	0	0	0	0	0
5	2	2	2	0	17	3	3	4	4	4	3	4	3	2	2	1	2	3	4	4	4	4	3	3	3	3	3	3	3	3	3	3	3	3	2	1	1	1	1	4	1	1	1	1	1	1	0	0	0
3	1	2	2	1	17	4	4	4	4	5	4	4	4	4	4	4	4	3	4	4	3	3	4	3	4	3	4	4	4	4	2	3	2	2	1	1	1	1	1	5	1	1	1	1	0	1	0	3	0
3	1	1	1	1	17	3	1	1	1	1	1	1	1	1	1	1	1	5	5	4	3	3	4	4	3	4	4	4	3	4	4	4	4	3	3	5	5	5	1	5	1	1	1	1	0	1	2	2	3
3	2	2	2	1	17	4	4	5	5	5	5	5	2	3	1	5	5	3	5	4	4	4	4	4	4	4	4	4	4	4	4	4	4	4	3	1	1	1	1	4	1	1	1	1	0	1	0	0	0
3	2	2	2	1	17	4	4	5	4	5	5	5	2	1	1	3	1	3	4	4	2	4	4	4	4	4	4	3	3	3	3	3	3	3	3	1	1	1	2	5	0	0	1	1	0	1	0	0	0
5	1	1	1	0	18	3	4	5	4	4	3	3	5	2	1	1	3	3	4	3	3	3	3	4	4	3	3	4	3	2	3	2	4	4	3	1	1	1	1	2							1	3	0
3	1	2	2	0	17	5	4	4	4	4	5	5	2	1	2	1	1			3	3	3		1	1	2	1	4	2	1	1	3	2	1	1	1	1	1	1	5	1	0	1	1	0	0	0	0	0
5	1	1	1	0	17	2	2	3	3	3	3	5	3	3	4	3	2	3	3	4	2	3	4	4	4	4	4	4	4	4	3	4	4	3	2	1	1	1	1	4	1	1	1	1	0	1	1	2	1
3	1	1	1	1	17	3	3	2	4	4	3	2	2	1	4	1	1	4	5	4	3	4	3	2	3	4	4	4	3	3	4	3	3	4	3	2	3	3	2	4	0	0	0	0	0	1	3	1	0
3	2	2	2	1	18	1	1	4	4	4	2	2	3	3	1	2	3	4	3	1	3	4	3	3	2	4	4	3	4	4	1	3	3	3	1	1	1	1	1	4	1	1	1	1	0	1	0	0	0
5	1	2	1	1	18	2	3	3	2	1	3	4	1	1	1	1	1	5	5	4	3	4	4	4		2	3	3		1	1			3	1	1	1	1	2	4	1	0	1		0		0	0	0
3	1	2	2	0	17	3	5	5	5	5	5	5	1	2	1	1	1	3	4	4	4	4	3	1	3	4	4	2	4	4	4	4	4	4	4	1	1	1	1	4	1	1	1	1	0	1	1	0	0
5	1	2	2	0	19	3	4	5	5	5	3	3	4	4	3	2	2	4	5	5	5	3	3	1	1	2	3	4	3	3	3	4	4	3	3	1	1	1	1	2	1	1	0	0	0	0	0	0	0
3	1	1	1	0	17	3	2	3	3	3	4	4	4	3	1	1	1	4	5	3	4	4	4	3	3	3	4	4	4	3	2	3	3	4	4	1	1	1	1	3	1	1	1	1	0	0	0	0	0
5	1	1	1	1	17	3	5			4	3	1	3	1	3	1	1	5	4	5	4	5	4	4	3	4	3	3	4	4	4	4	4	4	4	1	1	1	1	4	1	1	1	1	0	1	1	0	0
3	1	1	1	1	17	3	4	4	4	4	4	5	4	3	3	1	1	2	4	4	2	1	2	1	2	3	4	4	3	2	2	1	2	1	2	2	1	1	1	4	1	0	1	0	0	0	2	1	0
4	1	1	1	0	17	3	4	5	5	5	4	5	4	4	2	3	2	3	4	3	3	4	3	2	2	2	2	4	4	4	3	3	4	4	3	1	1	1	1	3	0	0	1	1	1	1	1	0	0
3	1	2	2	0	17	3	2	4	4	5	4	3	4	2	1	2	1	4	5	4	4	4	4	4	3	4	4	4		3	3	4	4	4	3	1	1	1	3	5	1	1	1	1	0	1	0	0	0
3	1	1	1	1	17	3	5	5	5	5	5	5	4	2	2	3	2	3	1	3	2	2	4	3	3	3	4	4	4	3	3	4	4	3	3	1	1	1	1	5	1	1	1	1	1	1	2	0	0
4	1	1	1	1	17	3	4	4	4	3	2	3	4	1	2	1	2	4	4	2	2	4	4	3	2	3	3	3	1	1	2	3	3	3	3	2	3	2	1	4	0	0	1	1	0	1	2	1	0
3	1	1	1	1	17	1	5	5	5	5	5	5	1	1	1	1	1	3	5	3	3	4	4	2	2	2	4	4	4	4	3	4	4	4	2	1	1	1	1	5	0	1	0	1	0	1	1	1	0
3	1	1	1	0	17	3	3	4	4	4	4	4	2	2	2	1	1	2	4	3	2	4	4	4	4	4	4	3	3	3	2	4	4	3	3	1	1	1	1	4	1	1	0	1	0	1	1	0	0
3	1	1	1	1	17	3	4	3	3	4	3	4	1	1	1	1	1	3	5	3	3	4	4	4	2	3	4	4	4	4	2	4	4	4	4	1	1	1	1	4	1	1	0	1	0	1	2	0	0
4	2	2	2	1	17	4	5		5	5	5	5	2	4	4	1	1	1	2	1	1	1	4	4	3	3	4	4	4	4	4	4	4			1	1	1	1	4	0	1	0	1	0	0	0	0	0
3	1	1	1	1	17	4	4	4	4	5	5	3	4	2	1	1	3	3	4	1	3	2	4	2	3	4	3	4	3	3	3	2	4	3	2	1	1	1	1	4	0	0	1	1	0	1	2	3	0
8	2	2	2	0	#NULL!	3	4	5	5	5	5	3	3	3	1	1	1	5	5	5	5	5	4	1	2	1	1	3	4	3	4	4	4	4	4	3	3	3	3	4	1	1	0	0	0	0	0	0	0
3	1	2	2	0	17	4	2	4	4	3	4	4	3	3	1	1	1	4	4	4	5	3	4	3	4	4	3	4	4	3	4	4	4	3	2	1	1	1	1	5	1	1	1	1	0	0	0	0	0
5	1	1	1	0	17	2	2	4	4	4	3	4	3	2	1	3	1	4	5	4	4	4	3	2	4	4	4	4	3	4	4	4	4	3	4	1	1	1	1	4	1	0	0	1	0	0	1	0	0
3	1	1	1	0	17	3	3	5	5	5	4	5	5	5	5	5	5	4	5	4	3	4	3	2	2	2	2	4	4	4	3	4	4	4	2	1	1	1	1	4	1	1	1	1	1	1	1	0	0
3	1	1	1	1	17	5	2	2	3	5	5	5	5	2	1	1	5	2	5	1	2	3	4	3	4	4	4	4	3	4	4	2	2	3	1	1	1	1	1	5	1	1	1	0	0	0	1	0	0
3	2	2	2	0	17	2	2	3	4	3	2	2	4	5	5	4	5	3	4	4	4	3	4	4	4	4	4	4	2	2	1	4	4	4	3	1	1	1	1	4	0	0	0	1	0	1	0	0	0
5	2	2	2	1	18	2	4	3	3	5	4	4	3	1	1	1	1	4	4	4	4	4	4	4	4	3	4	4	4	3	4	4	4	2	2	1	1	1	1	4	1	1	1	1	0	0	0	0	0
5	1	1	1	0	18	3	4	5	5	5	5	5	4	2	1	1	1	3	5	3	4	2	4	4	4	4	4	3	4	4	4	4	4	4	3	1	1	1	1	1	0	1	0	1	1	1	1	4	0
3	1	2	2	0	17	5	5	3		3		5	2	1	1	1	1	4	4	2	3	3	4	4	4	4	4	3	4	3	4	4	4	4	3	1	1	1	1	4	1	1	0	1	0	0	0	0	0
3	1	1	2	0	17	3	3	3	3	3	3	3	2	1	1	1	1	3	4	3	3	3	4	4	4	4	4	4	3		3	4	4	4	3	1	1	1	1	3	0	0	0	0	0	0	0	0	0
3	2	2	2	1	17							4	2	1	1	1	1	3	4	4	3	2	4	2	2	2	3	4				3	4	3	1	1	1	1	1	4							0	0	0
3	1	1	1	1	17	3	4	2	3	2	4	5	2	1	3	1	3	4	4	4	3	4	4	4	4	3	4	3	2	3	2	4	4	3	3	1	1	1	1	4	1	1	0	1	0	1	1	0	0
7	2	2	2	0	18		3	4	3	3	4	4	4	4	2	4	1	2	4	3	2	2	3	3	3	4	4	4	4	4	1	4	4	4	3	1	1	1	1	5	1	1	0	1	0	0	0	0	0
5	1	1	1	1	17	1	1	4	1	4	1	1	1	1	1	1	1	4	5	5	2	2	4	4	1	3	4	3	1	1	2	4	4	4	4	1	1	1	1	4	1	0	0	0	0	0	1	3	0
4	2	2	2	0	17	2	3	4	5	5	3	3	3	2	5	1	1	4	2	4	3	1	2	1	3	3	1	4	3	3	4	4	4	4	3	1	1	1	1	5	1	0	1	1	0	0	0	0	0
5	1	1	2	1	17	3	2			4	4	4	1	1	1	1	1	3	4	4	3	4	4	4	3	3	4	4	1	3	1	3	3	2	1	1	1	1	1	4	0	1	1	1	0	1	0	0	0
3	1	1	1	1	17	2	2	4	3	2	3	5	4	2	2	1	1	3	1	4	3		4	4	3	3	4	3	3	4	4	4	4	3	1	1	1	1	1	4	1	0	1	0	0	0	0	0	0
3	1	1	1	1	18	5	1	1	1	1	5	5	1	1	1	1	1	5	5	3	5	5	3	3	1	1	1	3	3	3	3	3	3	3	1	1	1	1	1	5	1	1	1	1	0	0	1	0	0
3	2	2	2	1	17	5	4	3	2	1		5	1	1	1	1	1	5	5	5		5	1	1	1	1	1	4	4	4	4	4	4	4	4	5	5	5	5	5	1	1	1	1	1	1	0	5	4
3	1	2	2	1	17	3	4	2	3	3	3	3	3	3	3	3	3	4	4	4	4	4	2	2	2	2	2	4	3	2	3	2	3	2	3	3	3	3	3	5	0	1	1	1	1	1	0	2	4
3	1	1	1	0	17	2	1	4	4	4	2	4	2	2	2	3	2	3	5	5	3	4	4	3	4	3	3	4	3	4	4	3	4	4	4	1	1	1	1	5	1	1	1	0	0	0	1	0	0
3	1	2	1	0	17	2	4	3	4	3	1	4	2	1	1	1	1	3	5	4	4	3	4	4	4	4	4	4	3	3	3	4	4	4	4	1	2	1	1	4	0	1	1	1	0	0	1	0	0
3	1	1	1	0	17	3	3	3	4	4	3	5	3	1	1	3	1	2	4	2	1	1	4	3	3	3	4	4	2	2	2	4	4	4	4	1	1	1	1	4	1	1	1	1	0	0	0	0	0
3	1	1	1	0	17	3	2	2	2	3	2	4	2	1	1	1	2	4	5	5	3	3	4	3	3	3	4	4	3	2	3	4	4	4	4	1	1	1	1	3	1	1	1	1	0	1	1	0	0
3	1	1	1	0	17	2	1	4	3	4	1	3	4	3	3	1	1	2	4	4	2	2	4	3	4	4	4	3	3	4	4	4	4	3	2	3	4	1	1	2	0	1	1	1	1	0	1	0	0
3	1	1	1	0	17		3	4	4	4	3	4	4	2	2	1	2	2	5	4	3	4	3	3	4	4	4	4	3	3	4	4	3	4	4	1	1	1	1	4	1	1	1	1		0	1	0	0
3	1	1	2	1	19	4	4	3	3	3	4	4	4	3	3	3	2	2	3	4	1		4	4	4	4	4	4	1	1	1	3	2	3	3	1	1	1	1	5	1	1	0	1	0	1	1	2	4
3	1	2	2	1	17	1	4	5	5	2	2	2	3	1	1	1	5	4	4	5	4	3	4	4	4	4	4	4	3	4	4	3	4	4	3	1	1	1	1	5	0	1	0	1	1	1	0	0	0
3	1	2	1	0	17	3	4	3	5	5	3	4	4	3	1	2	1	3	4	3	2	2	4	3	4	4	4	4	4	3	3	4	4	4	4	1	3	1	2	5	0	0	1	1	0	0	0	0	0
3	1	1	1	0	17	3	3	3	3	4	4	4	5	2	3	2	2	3	5	5	4	4	4	2	3	3	3	4	3	3	2	3	3	3	3	3	3	3	3	4	1	1	1	1	1	1	1	1	1
1	1	1	1	1	17	3	3	3	3	3	4	5	2	1	1	1	1	3	5	4	3	3	3	3	3	3	3	3	3	3	3	3	3	3	2	1	2	1	1	4	1	1	1	1	0		1	0	0
3	1	1	1	1	17	3	4	4	3	5	4	4	4	3	2	1	2	3	2	4	3	2	1	1	1	1	1	3	3	2	3	2	2	1	1	1	1	1	1	4	1	0	1	1	0	0	1	0	0
3	1	2	2	1	17	3	5	3	4	4	5	5	3	1	1	2	1	1	4	4	3	1	3	1	4	3	4	3	2	2	4	4	4	2	2	1	1	1	1	3	1	1		1	0	0	0	0	0
3	1	1	1	0	17	3	3	4	4	4	4	5	4	2	2	2	3	4	5	4	3	3	4	4	3	3	4	3	3	3	3	1	2	2	4	1	1	1	1	4	1	1	1	1	0	1	2	0	1
3	1	2	2	1	17	3	3	3	3	4	3	4	2	1	1	1	1	3	5	4	3	2	4					4	3	4		4	4	4	2	1	1	1	1	4	1	1	0	1	0	0	1	0	0
4	1	1	1	0	17	3	3	4	4	5	3	4	3	2	1	1	1	4	5	5	4	5	4	4	4	4	4	3	3	3	3	3	3	3	3	4	4	4	5	4	1	1	1	1	1	0	0	0	0
3	1	1	1	1	17	3	3	3	3	3	5	5	3	2	2	1	1	4	5	5	1	3	4	2	4	4	4	4	2	2	2	1	1	3	2	1	1	1	1	5	1	1	0	0	1	0	1	0	0
3	1	1	1	1	19	4	5	5	5	5	5	5	1	1	1	1	1	3	5	5	3	3	4	4	4	4	4	3	4	4	4	4	4	4	4	1	1	1	1	5	1	1	1	1	1	1	1	1	0
3	1	1	2	1	16	4	3	5	5	5	4	5	3	1	2	2	3	4	4	3	3	3	4	3	2	2	3	3	3	3	3	3	3	3	2	1	1	1	1	5	1	0	1	0	0	0	0	0	0
3	1	1	1	1	17	3	4	3	2	2	4	4	3	1	1	1	1	4	4	4	4	4	4	2	4	4	4	4	3	3	3	4	4	4	3	1	1	1	1	4	1	1	1	1	1	1	1	0	1
3	1	1	1	1	17	4	4	5	3	5	4	5	4	4	4	2	5	4	4	4	1	1	4	2	4	3	3	4	4	4	4	4	4	3	2	2	3	2	4	3	0	0	0	1	0	1	1	0	0
5	1	1	1	0	17	4	2	3	3	4	2	4	2	1	1	1	1	4	5	4	4	4	4	3	4	4	4	4	3	3	2	3	3	3	2	2	4	1	3	4	0	0	1	0	0	1	1	1	0
3	2	2	2	0	17	4	3	2	3	3	3	3	4	1	1	5	2	3	5	3	3	4	4	2	3	4	3	4	3	4	2	3	4	3	1	3	3	2	2	5	1	0	0	1	0	1	1	0	0
4	1	1	1	0	17	2	2	3	2	3	1	5	4	1	1	1	1	2	5	4	2	3	3	2	2	3	3	4	3	3	3	4	4	4	3	1	1	1	1	3	0	0	1	1	0	1	1	0	0
3	1	1	1	0	17	3	3	3	2	1	2	2	3	2	1	1	3	2	4	3	3	3	4	2	4	4	4	4	3	2	2	4	4	4	2	1	1	1	1	2	0	0	1	1	0	1	0	0	0
3	1	1	2	0	17	4	3	4	4	4	5	5	3	2	2	2	1	3	4	2	3	4	4	2	3	4	4	4	3	3	4	3	4	4	3	1	1	1	1	3	1	1	0	1	0	1	2	2	2
3	1	1	1	0	17								5	4	3	3	3	4	5	4	4	4	4	4	4	4	4	4	4	4	3	4	4	4	4	2	2	1	2	3	1	1	1	1	1	1	2	2	1
3	1	1	2	0	17	5	5	5	5	5	5	5	5	5	5	5	5	2	4	3	3	3	4	2	1		2	3	1	3				2	1	4		1		5	0	0	0	0	0	0	3	5	4
5	1	1	1	0	18	2	3	4	4	4	3	4	4	3	3	3	1	4	5	4	4	5	4	4	4	4	4	4	3	3	3	4	4	4	4	1	1	1	1		1	1	1	1	0	0	1		0
3	1	1	1	1	17	1	2	3	5	5	1	2	2	1	1	1	1	4	5	2	4	3	4	3	4	3	4	4	4	4	4	4	4	3	3	1	1	1	1	5	1	1	1	1	0	0	0	0	0
1	2	1	1	1	16	4	4	4	4	4	4	4	2	2	3	2	1	5	5	5	5	3	4	3	4	4	3	4	4	4	3	3	3	3	4	5	5	4	4	5	1	1	1	1	0	0	1	0	0
3	1	1	1	1	16	3	5	4	4	1	1	5	2	2	2	1	3	3	5	4	1	4	4	2	4	4	3	3	3	2	4	4	3	3	2	1	1	1	1	5	0	0	1	0	0	0	2	0	0
7	1	1	1	1	16	5	4	5	4	5	4	5	5	4	4	4	3	5	5	3	5	5	3	2	1	2	2	4	1	3	1	3	3	4	3	1	1	1	1	5	1	0	1	1	0	1	2	0	0
6	2	2	2	0	17		3		4	4		3	1	1	1	1	1	4	4	5	4		4				4	4	4	3	3									4	0	1	1	1	0	0	0	0	0
3	2	2	2	0	16	4	1		1	3	5	5	5	5	5	5	1			1	5	1	4	4	4	4	4	3	4	4	4	4	4	4	4	1	1	1	1	5	0	1	0	0	0	0	0	0	0
3	1	1	1	0	16		3	4		4	3	3	3	1	1	2	2	4	5	5	4	5	3	3	4	4	4	4	4	4	2	4	4	4	3	1		1		4	1	1	1	1	1	1	1	0	0
3	1	1	1	0	16	3	5	3	4	3	2	2	4	3	2	1	2	4	3	3	4	3	4	3	4	4	4	3	4	4	4	4	4	4	3	1	3	1	1		0	0	1		0	0	2	0	0
5	1	1	1	0	17	1	5	1	1	1	1	1	5	5	5	5	5	5	5	3	4	4	4	2	3	4	3	4	4	4	4	3	4	4	4	2	2	2	2	5	1	1	1	1	1	1	1	0	0
3	1	1	1	0	16	3	4	5	4	5	5	5	2	1	1	1	1	4	5	5	4	4	4	3	4	4	4	4	3	4	3	4	4	4	4	1	2	1	1	4	1	1	1	1	0	1	0	0	0
3	1	1	1	1	16	3	4	4	4	5	4	5	4	3	4	3	4	4	5	3	2	2	4	4	4	4	4	3	4	3	4	3	3	3	3	1	1	1	1	4	0	1	1	1	0	0	0	0	0
5	1	1	1	1	16	3	3	3	3	3	3	3	3	3	3	3	3	5	5	5	5	5	1	3	3			2	2	2	3	3	3	3	3	3	3	3	3	5	1	1	1	1	1	1	4	5	4
1	1	1	1	1	16	4	4	4	5	5	4	4	3	2	2	3	1	4	4	3	2	3	3	3	4	3	2	2	2	2	2	3	3	3	3	1	2	1	1	3	0	0	0	1	1	0	1	0	0
3	1	1	1	1	16	1	1		5	2	5	1	1	3	1	1	1	5	4	4	4	3	3	2	4	4	2	4	3	3	3		3	3		1	1	1	1	5	1	1	1	1	1	1	0	0	0
3	1	1	1	1	16		2	4	4	4	2	3	1	2	2	1	2	1	4	3	2	2	4	3	4	4	4	4	3	3	2	3	4	1	1	1	1	1	1	5	1	1	0	0	1	0	0	0	0
3	1	2	1	0	18	2	3	4	4	4	3	5	3	2	3	3	3	4	3	4	4	3	4	1	4	2	3	4	2	3	2	3	4	3	2	1	3	1	1	5	1	0		1	0	0	1	0	0
5	1	2	1	1	16	1	1	4	2	1	1	1	4	4	4	1	1	4	4				4	3	2	2	3	4	4	4	4	4	4			1	1	1	1	2	1	1	1	1	0	0	0	0	0
3	1	1	1	0	16	3	2	4	4	4	3	3	5	4	3	2	2	5	5	4	5	4	3	2	4	3	2	4	4	4	4	4	4	4	4	1	1	1	1	5	1	1	1	1	0	0	0	0	0
3	1	1	1	0	16	2	3	4	4	4	3	4	5	5	4	3	3	3	4	3	4	3	3	1	3	1	4	4	1	3	3	3	3	4	2	1	1	1	1	4	1	1	1	1	0	0	0	0	0
3	1	1	1	1	13	2	2	2	2	2	2	2	1	1	1		1	5	5	5	4	5	4	4	4	4	4									3	3	3	3	4	0	0	0	0	0	0	0	0	0
5	1	1	1	0	16	2	1	2	3	4	3	2	1	1	1	1	1	4	5	3	3	3	4	3	4	3	3	4	3	3	2	3	3	3	1	1	1	1	1	3	0	0	1	0	0	0	0	0	0
3	1	2	1	0	16		4	3	5	5		1	5	3	3		1	2	2	1	2	4		3	2		3	3	3		2	4	4	4	3	1	1	1	1	5	1	1	1	1	1	1	1	3	0
5	1	1	1	1	16	4	5	1	4	5	5	3	3	4	2	3	4	5	5	3	5	5	4	4	4	4	4	4	3	2	4	3	4	3	2	1	1	1	1	5	1	0	1	1	0	1	0	0	0
3	1	1	1	1	16	3	4	3	5	4	3	3	2	3	2	3	2	3	5	4	5	4	4	4	4	4	4	3	3	4	3	4	4	4	4	1	1	1	1	5	1	1	1	1	0	1	0	0	0
3	1	1	2	0	17	3	5	4	4	4	3	4	1	1				3	5	4	5	4	3	3	4	2	4	4	4	4	4	4	4	4	4	3	3	3	3	4							0	0	0
3	1	1	1	1	16	2	5	3	4	3	2	2	3	2	1	1	2	3	5	4	4	4	4	3	3	3	4	4	3	3	3	3	4	4	3	1	1	1	1	5	1	1	0	1	1	0	1	0	0
3	1	1	1	0	16								1	1	2	1	1	4	4	4	4	4	4	4	4	4	4	3	3	3	3	3	3	3	3	1	2	1	1	4	1	0	0	1	0	0	0	0	0
5	1	1	1	1	16	3	5	5	5	5	5	5	3	3	2	3	2	4	5	3	1	3	4	4	4	4	4	3	3	4	4	3	4	2	2	1	1	1	1	5	1	1	1	0	0	0	0	0	0
5	1	1	1	0	16		3	3	3	3	4	5	3	2	2	3	2	3	5	4	4	3	4	4	3	4	4	4	3	3	3	4	4	4	3	1	1	1	1	4	1	1	1	1	0	0	0	0	0
3	1	1	1	0	16	4	4	4	3	4	4	4	3	3	3	2	2	4	4	4	3	3	3	3	2	3	2	3	3	3	3	2	3	3	3	1	1	1	1	5	0	0	0	0	0	1	2	1	0
3	1	1	2	0	16	2	5	4	5	5	1	1	4	4	3	1	3	4	5	4	4	3	4	2	3	3	4	3	4	4	2	2	4	4	2	1	1	1	1	3	0	1	1	1	0	1	2	1	1
4	1	1	1	1	16								3	2	2	2	3	3	4	3	2	3	4	4	3	3	4	4	1	1	1	4	3	2	2	1	1	1	1	4	1	1	1	1	0	0	2	0	0
3	1	1	1	0	16	1	4	3	5	5	1	1	4	1	1	3	1	4	5	4	3	4	4	3	4	3	3	4	3	3	3	4	4	4	4	1	1	1	1	5	1	0	0	0	0	1	0	0	0
3	1	1	1	0	16	3	4	4	4	4	4	4	4	1	3	2	2	3	4	3	4	3	4	3	4	4	4	4	3	3	3	4	4	4	4	1	1	1	1	4	1	0	1	1	0	0	0	0	0
3	1	1	1	1	16								5	5	5	3	4	3	5	2	1		2	3	2	3	4	3	3	3	3	3	3	4	3	1	1	1	1	4	0	1	0	1	1	0	2	0	0
7	1	1	1	0	16			3	5	5	5	5	3	4	4	5	5	4	5	3	2	2	4	2	4	4	3	4	4	4	4	4	4	4	4	1	1	1	1	4							0	0	0
3	1	1	1	1	16	5	5	1	1	1	5	5	2	2	1	1	1	5	5	2	2	1	4	4	4	4	4	4	1	1	1	3	4	3	3	1	1	1	1	2	0	0	0	0	0	0	0	0	0
3	1	1	1		16								4	4	1	1	2	4	4	3	4	1	4	2	4	3	4	4			3	4	4	4	4	1	1	1	1	5							0	0	0
3	1	1	1	1	16	3	3	3	3	3	3	3	2	1	1	1	1	3	5	5	4	5	4	2	4	3	3	4	3	3	3	4	3	4	4	1	1	1	1	4	0	0	0	1	0	0	1	0	0
7	1	1	1	1	16	3	3	3	3	3	3	3	2	2	2	1	1	3	3	5	2	5	3	1	2	2	2	3	2	2	2	3	3	1	1	3	3	3	3	5	1	1	1	0	0	1	0	0	0
3	1	2	1	1	16	4	5	5	4	5	1	1	2	5	1	3	1	4	4	3	4	5	4	4	3	2	4	3	3	3	2		3	4	4	1	1	1	1	1	0	0	0	0	0	0	0	0	0
5	1	1	1	1	16	3	3	3	2	4	3	4	3	4	1	1	1	4	5	4	3	2	4	2	4	4	3	4	4	4	4	3	4	4	2	1	1	1	1	5	0	0	0	0	0	0	1	0	0
5	1	1	1	0	16	4	2	4	4	4	4	4	3	3	1	1	1	2	5	4	5	5	3	3	3	3	2	4	3	3	4	3	2	4	3	2	2	2	2	4	0	1	0	1	0	1	2	3	0
3	1	1	1	1	17	4	4	4	4	3	4	4	3	1	1	1	3	3	4	4	3	3	3	3	2	4	4	3	2	2	2	3	3	2	3	1	1	1	1	5	0	0	0	0	0	0	2	0	0
3	1	1	2	0	16	1	5	4	5	4	1	4	5	4	1	2	1	5	5	3	4	4	4	4	4	4	4	4	4	4	4	4	4	4	4	1	1	1	1	4	0	1	1	1	0	0	0	0	0
3	1	1	1	0	16	2	3	4	4	4	4	4	3	1	1	3	1	4	5	4	5	5	4	4	4	4	4	4	3	4	4	4	4	4	4	1	2	1	1	5	1	1	1	0	1	0	2	0	0
3	1	2	1	0	16								4	4	3	4	4	4	5	3	4	1	4	2	4	4	4	4	3	3	4	3	3	3	2	1	1	1	1	5							1	0	0
3	1	1	1	1	16	2	4	4	3	3	2	3	2	2	1	1	1	4	5	5	4	3	4	3	3	3	3	4	3	3	4	3	4	3	4	1	1	1	1	5	1	1	1	1	1	1	2	0	0
3	1	1	1	0	16	2	4	4	4	4	4	4	4	2	2	1	3	4	4	3	3	4	3	2	3	3	3	3	3	3	3	3	2	3	3	2	3	1	1	3	1	0	1	1	0	1	1	0	0
3	1	2	2	1	16	3	4	4	5	1	5	5	3	2	1	4	2	3	4	4	3	4	4	2	2	2	3	4	3	3	3	4	4	4	4	1	1	1	1	4	1	0	0	1	0	1	0	0	0
3	1	1	1	1	16	1	1	1	1	1	4	4	2	2	2	1	2	5	5	5	4	5	4	3	4	4	4	4	3	4				4	4	1	1	1	1	5	1	0	0	1	0	0	0	0	0
3	1	1	2	1	16	3	4	3	4	4	4	5	3	2	2	2	2	4	5	5	4	3	4	2	3	3	4	3	3	3	3	3	2	3	2	1	1	1	2	4	1	0	1	1	0	0	0	0	0
3	1	1	1	0	16	2	3	4	5	5	3	5	5	3	4	1	3	4	5	3		4	4	4	4	4	4	3	3	3	3			4	4	1	1	1	1	5	1	1	1	0		0	0	0	0
5	1	1	1	1	16	2	2	2	4	5	3	4	3	1	2	2	1	4	5	5	4	3	4	2	3	4	4	4	3	4	2	4	3	4	4	1	1	1	1	4	0	0	0	1	0	0	1	0	0
3	1	1	1	1	16	5	4	4	2	4	5	5	2	2	2	1	3	4	5	3	4	3	4	4	4	4	4	3	2	2	1	3	3	4	2	3	4	2	3	4	0	1	0	1	0	1	3	0	0
5	2	2	2	1	17	2	2	3	3	4	3	4	1	1	1	1	1	5	4	4	4	5	3	4	3	4	4	4	2	4	1	4	4	2	1	1	1	1	1	4	1	1	1	0	1	0	0	0	0
7	1	1	2	0	16	2	1	5	5	5	3	3	4	3	3	1	3	4	3	4	5	3	2	1	3	2	2	4	3	3	3	1	2	2	3	1	1	1	1	4	1		1	1	0	1	1	1	0
3	1	1	1	1	16	3	4	4	4	5	3	3	3	3	2	1	2	4	5	5	5	5	3	2	3	2	3	4	2	3	2	4	3	3	2					4	1	1	1	1	0	1	0	0	0
4	1	2	2	0	16	3	4	4	4	4	4	3	4	4	4	5	4	2	3	2	3	2	2	2	3	2	3	3	2	2	1	4	3	3	2	1	1	1	1	4	1	0	1	1	0	1	0	3	0
3	1	1	1	1	16	4	5	5	5	5	5	4	2	2	2	1	1	4	5	4	4	4	4	3	4	4	4	3	4	4	4	4	3	4	4	1	1	1	1	5	1	1	1	1		1	2	0	0
3	1	1	1	0	16	3	2	3	3	4	3	4	2	2	1	2	2	4	5	3	5	3	4	3	4	3	4	3	3	3	3	4	4	4	2	1	1	1	1	4	1	1	1	1	0	1	0	0	0
3	1	2	2	0	16	3	2	4	1	5	5	5	3	2	1	2	1	3	2	4	3	4	2	2	3	3	4	4	3	4	2	4	4	3	2	1	1	1	1	4	1	1	1	1	1	1	0	0	0
4	1	1	1	1	17	2	3	3	3	4	4	4	1	1	1	1	1	4	3	3	3	3	4	3	4	3	3	4	4	3	4	3	3	2	2	2	4	4	3	5	1	0	0	0	0	1	1	3	1
3	1	1	1	1	16	1	3	1	1	1	1	3	1	1	1	1	1	5	5	5	5	5	4	4	4	4	4	4	3	2	3	4	4	4	4	1	1	1	1	5	1	1	0	0	0	1	0	0	0
9	1	1	1	0	16	3		4		4	2	3	2	3	1	2	2	3	3	3	3	4	4		4	4	3	3	3	3	3	4	3	4	3	2	2	1	2	4							0	0	0
3	1	2	2	1	16	5	5	4	4	4	5	5	2	1	1	1	1	4	4	4	4	3	4	3	3	3	3	2	3	2	3	3	3	2	1	1	1	1	1	4	0	0	0	1	0	0		0	0
3	1	1	1	1	16	2	3	4	2	4	3	3	3	2	2	2	1	2	4	3	2	2	3	2	3	3	3	3	3	3	3	3	3	3	2	1	1	1	1	5	0	0	0	0	0	1	1	0	0
4	1	9	1	1	16	3	4	4	4	4	4	4	3	3	1	1	2	4	5	4	4	4	4	4	4	4	4	4	4	4	4	4	4	4	3	1	1	1	1	5	1	1	1	1	0	1	0	0	0
3	1	1	1	0	16	3	5	3	3	4	1	1	4	4	4	5	3	3	4	3	3	3						3	3	3	3	3	3	3	3					3							1		0
1	1	1	1	1	16	3	1	3	5	5	3	3	4	1	1	1	4	4	5	3		3	4	3	4		4	4		3		4	4	4	4	1	1	1	1	4	1	0	1	1	0	1	0	0	0
3	1	1	2	1	16	2	5	5	5	5	4	5	3	1	1	1	1	3	5	4	4	3	4	4	4	4	4	4	4	4	4	4	4	4	4	1	1	1	1	5	1	1	1	1	0	1	0	0	0
3	1	1	1	0	16	3	3	3	3	3	3	3	4	4	4	2	3	4	4	4	3	3	3	2	2	2	3	3	3	3	3	4	4	4	4	3	2	2	2	3	0	0	0	0	0	0	1	0	0
3	1	1	1	1	16	1	1	4	5	5	3	5	3	1	1	2	1	4	5	3	5	3	4	3	4	4	4	4	1	2	1	4	3	4	2	1	1	1	1	5	1	1	1	0	1	0	0	0	0
3	1	1	1	1	16	3	2	4	4	3	5	2	2	3	2	2	4	4	5	4	4	5	3	1	4	4	4	4	3	1	1	3	3	3	3		4	1	1	4	1	0	0	0	0	1	1	3	2
3	1	1	1	0	16	3	2	4	5	5	2	5	4	4	3	2	1	1	5	2	3	2	4	4	3	4	4	4	4	3	3	4	4	4	4	1	1	1	1	4	1	1	0	0	0	0	0	0	0
3	1	1	1	1	16	2	4	4	4	4	3	4	3	2	1	1	2	3	5	4	2	2	4	4	3	3	3	4	3	3	4	4	4	4	4	1	1	1	1	4	1	1	1	0	0	1	0	0	0
3	1	1	1	1	16	1	1	4	2	4	4	5	3	4	4	1	2	3	4	2	2	3	4	3	4	3	4	3	3	3	3	3	3	3	2	1	1	1	1	4	1	1	0	1	0	0	1	0	0
5	1	1	1	1	16	2	2	2	3	3	2	4	1	1	3	1	1	4	4	4	3	2	3	3	4	2	2	4	3	3	2	3	3	3	3	1	1	1	1	5	1	1	1	1	1	1	1	0	0
4	1	1	1	1	16	2	2	5	2	4	3	3	3	1	1	2	1	4	3	2	4	4	4	3	4	4	4	4	3	3	2	4	3	3	2	2	4	2	1	4	0	1	1	1	0	0	0	0	0
3	1	1	1	0	16	2	4	4	4	4	4	4	2	1	1	2	1	5	5	4	4	3	4	2	4	4	4	4	4	3	3	2	4	4	4	1	1	1	1	4	1	1	0	1	0	0	0	0	0
3	1	2	2	1	16	3	2	3	4	4	3	4	4	1	1	1	1	3	2	3	4	3	3	2	2	1	3	4	2	2	4	2	4	3	3	1	1	1	1	5	1	0	0	1	0	0	0	0	0
3	1	2	1	0	16	3	5	3	4	5	5	5	5	5	4	4	4	2	4	3	3	2	4	1	3	3	4	4	2	2	4	4	4	4	4	1	1	1	1	2	0	1	1	1	1	0	0	0	0
3	1	1	1	0	16								2	1	1	1	1	2	5	5	3		4	3	4	4	4	4	4	4	4	4	4	4	3	1	1	1	1	5	0	1	0	0	0	1			0
3	1	1	1	1	16	3	3	4	4	5	4	5	2	1	1	1	1	4	5	3	2	3	4	3	4	4	4	4	3	4	4	4	4	2	2	1	1	1	1	5	1	1	1	1	0	0	0	0	0
3	1	1	1	1	16	4	4	5	4	4	5	5	3	3	2	2	1	4	4	4	3	2	3	4	4	4	3	4	4	3	3	4	3	4	4	3	3	3	4	4	0	0	0	0	0	0	2	0	0
3	1	1	1	0	16	5	5	4	5	5	5	5	2	2	1	1	1	3	5	5	1	4	4	4	4	4	4	3	3	3	4	4	4	4	4	1	1	1	5	3	0	1	0	1	0	0		0	0
3	1	1	1	1	16	3	4	3	4	5	4	3	3	3	1	1	1	3	3	3	4	4	3	3	2	2	2	4	4	4	4	4	4	4	3	1	1	1	1	5	1	1	1	1	0	0	0	0	0
3	1	1	1	1	16	1	5	4	4	4	4	4	1	1	1	1	1	5	5	2	2	3	4	4	4	4	4	4	4	4	4	4	4	4	4	1	1	1	1	5	1	1	1	1	1	1	0	0	0
3	1	1	1	0	16	3	2	3	3	3	4	4	5	2	4	2	2	4	5	4	4	4	4	4	4	4	4	4	3	3	3	4	4	4	4	1	1	1	1	4	1	1	1	1	0	0	0	0	0
3	1	1	1	1	16	4	3	3	3	3	4	3	2	2	2	2	2	3	5	4	3	3	3	4	4	4	4	3	3	3	4	4	4	4	3	1	1	1	1	4	0	0	0	1	0	1	0	0	0
3	1	1	1	1	17	3	4	4	4	4	3	3	2	2	2	2	2	4	5	5	4	4	1	1	1	1	1									3	3	3	3	5	1	0	1	1	0	0	2	1	0
3	1	1	2	0	16	1	5	5	5	5	5	5	3	4	4	4	1	4	5	3	3	3	3	4	4	4		3	3	4	4	4	4	4	4	1	1	1	1	5	1	1	1	0	0	1	1	0	0
3	1	1	1	1	16	3	3	3	3	3	3	3	2	2	2	2	1	2	4	3	2	1	3	2	3	2	2	3	2	2	2	3	3	3	3	1	1	1	1	4	0	0	0	1	0	1	0	0	0
3	1	1	1	1	17	4	5	4	5	4	5	4	4	4	4	5	4	3	4	3	1	3	4	4	3	4	4	3	3	3	3	3	3	4	4	1	1	1	2	4	1	1	1	0	0	0	0	0	0
3	1	1	1	1	16	4	4	4	4	4	4	4	2	2	2	1	1	4	4	4	3	3	4	2	3	3	4	3	3	3	3	4	3	4	3	2	2	2	2	4	1	1	1	1	0	1	1	0	0
3	1	2	2	0	16		3	4	5	4	3	3	4	2	1	1	2	3	3	2	2	1	3			1	3	4	3	3				4	3	1	1	1	1	4	0	1	1	0	0	0	0	0	0
3	1	1	1	1	16	3	4	3	3	3	3	3	3	4	2	5	5	3	4	4	5	4	4	3	3	3	4	3	3	3	3	4	4	4	3	1	1	1	1	5	1	1	0	1	0	0	0	0	0
3	1	1	1	1	16																																			5	0	1	1	0	0	1	0	0	0
3	1	1	1	0	16	1	3	5	5	5	2	2	4	2	2	1	1	3	4	4	3	2	4	3	3	3	4	4	4	4	4	4	4	3	2	1	1	1	1	4	1	0	1	1	0	0	0	0	0
3	1	1	1	1	16	2	3	4	4	4	5	4	3	3	1	2	2	2	3	5	2	1	3		4	3	4	4		2	3	2	3	3	4	1	1	1	1	3	0	0	1	1	0	0	0	0	0
3	1	1	1	1	16													3	5	3	3	3	3	3	3	4	4
3	2	2	2	1	16	2	3	3	3	3	3	3	4	1	2	1	1	3	4	4		3	1	1	1	1	3	3	3	1	1	1	1	2	1	1	1	1	1	5	0	0	1	1	0	0	0	0	0
3	1	1	1	1	16	4	5	4	4	5	5	5	3	2	2	1	1	4	4	3	3	4	3	3	2	3	3	4	3	3	2	3	3	3	3	1	1	1	1	5	1	0	0	1	0	0	0	0	0
3	1	1	1	0	16	4	5	5	5	5	5	5	2	1	1	1	1	3	4	2	2	2	4	4	4	4	4	4	3	3	1	4	4	4	3	1	1	1	1	5	1	1	0	1	0	0	0	0	0
3	1	1	1	0	16	3	2	4	5	5	5	5	3	1	1	2	1	2	4	5	2	2	4	4	4	4	4	4	4	4	3	3	4	3	2	1	3	1	1	4	1	1	1	1	0	0	1	0	0
3	1	1	1	0	16	3	3	3	3	3	3	3	1	2	2	2	1	5	5	4	4	4	4		2	3	4	4	4	3	2	4	4	4	4	3	3	3	3	5	1	1	0	0	0	0	0	0	0
3	1	1	1	0	16	3	3	3	4	3	3	3	2	1	1	1	1	4	5	4	3	4	4	2	4	3	3	4	3	2	3	3	3	4	4	1	1	1	1	4	1	0	1	0	1	1	1	0	0
3	1	1	1	0	16	3	3	4	4	4	4	3	3	2	1	3	1	3	4	4	4	3	4	2	4	3	4	4	3	4	4	4	4	4	4	1	3	1	1	4	1	1	0	0	0	0	1	0	0
5	1	2	1	0	16	3	4	3	3	3	4	3	3	3	3	3	2	3	4	3	3	4	3	2	2	2	2	4	3	3	3	3	2	3	2	3	3	3	3	4	1	0	0	1	0	1	1	2	1
3	1	1	1	1	17	4	4	3	4	4	5	5	3	3	3	2	3	4	5	4	3	3	4	2	4	4	4	4	4	4	4	4	4	4	3	1	1	1	1	4	1	1	0	0	1	1	2	3	1
3	1	1	1	1	16	3	4	4	4	4	5	5	3	2	1	1	1	5	5	5	5	5	4	3	2	3	3	4	2	2	2	3	3	4	3	1	1	1	1	5	0	0	0	0	0	1	1	0	1
3	1	1	1	1	16	2	3	4	4	4	4	4	1	1	1	1	1	3	4	4	3	3	4	1	2	3	3	4	3	2	3	2	4	4	4	1	1	1	1	5	1	1	0	0	0	0	0	0	0
5	1	1	1	0	16	1	4	3	4	3	5	5	4	2	2	5	3	4	5	4	4	4	4	4	3	4	4	4	2	3	2	3	4	4	4	1	1	1	1	4	1	0	0	1	0	1	2	0	0
3	1	1	1	0	16	2	2	2	3	4	1	2	2	2	2	2	2	3	5	3	3	2	4	3	4	4	4	4	4	4	3	4	4	4	3	1	1	1	1	3	0	0	1	0	0	0	0	0	0
3	1	1	1	1	#NULL!																															1	1	1	1
3	1	2	1	0	16		2	3	4	4	4	4	4	4	3	2	1	5	5	4	3	3	4	3	4	4	2	4	3	3	2	3	3	4	4	1	1	1	1	3	1	1	1	1	0	1	0	0	0
3	1	2	2	1	17	1	2	1	2	2	5	5	4	4	4	3	4	3	4	3	3	3	1	3	2	2	2	3	2	1	1	4	4	4	4	1	1	1	1	4	1	1	0	1	0	1	0	0	2
3	1	1	1	0	16	3	4	5	5	5	4	3	4	1	3	1	1		5	3	2	4	4	4	4	3	4	3	2	3	1	4	4	3	2	1	3	1	3	4	1	1	0	0	1	0	1		0
3	2	2	2	0	17	5	3	4	3	3	5	5	5	5	5	4	1	2	1	1	3	3	1	1	2	1	1	4	4	4	4	4	4	2	1	1	1	1	1	5	1	1	1	1	0	0	1	2	0
3	1	1	1	1	16	4	3	4	4	4	5	5	3	2	1	1	1	4	5	4	4	4	4	3	4	4	4	3	3	3	2	4	3	4	3	1	1	1	1	3	1	1	1	1	0	1	0	0	0
5	1	1	1	1	17	5	4	4	4	5	5	5	2	2	1	1	1	2	3	3	2	2	4	3	3	3	3	3	2	2	3	3	3	2	2	2	2	2	2	5	0	0	0	1	0	0	2	0	0
3	1	1	2	0	17	3	3	3	3	3	3	3	4	4	2	1	1	5	5	4	5	3	4	3	3	4	4	4	3	3	3	2	2	3	3	3	3	3	3	4	1	0	1	1	0	1	1	5	0
3	1	1	1	0	16	2	3	4	4	5	4	4	5	4	4	1	4	4	5	4	4	4	4	3	4	4	4	4	3	3	3	4	4	4	2	1	2	1	1	4	1	1	1	1	0	0	1	1	0
3	1	1	1	0	16	4	4	3	5	4	5	3	3	3	2	1	2	5	5	4	4	4	4	4	4	4	4	4	3	2	3	3	4	4	2	3	4	3	3	3	1			0	0	0	1	0	0
4	1	1	1	0	16	3	3	4	5	5	5	4	3	4	3	2	1	4	5	4	5	5	3	3	2	2	3	4	3	3	3	4	4	4	2	1	2	1	1	3	1	0	1	1	0	1	1	0	0
3	1	1	1	0	16	2	2	2	1	1	1	3	3	3	2	1	1	2	2	3	2	3	4	4	4	4	4	4	4	4	4	4	4	4	4	1	1	1	1	5	0	1	1	1	1	1	0	0	0
3	1	1	1	1	16	3	2	4	4	5	4	5	3	3	2	1	4	3	4	2	2	3	4	2	4	4	3	4	3	3	3	4	2	3	2	3	3	3	3	5	0	1	1	1	0	1	0	0	0
3	1	1	1	1	17	1	1	1	1	1	1	1	2	2	2	2	2	3	3	3	3	3	3	3	3	2	3	4	4	4	4	4	4	4	4	1	1	1	1		1	1	0	0	1	0	1	3	0
3	1	1	2	0	17	3	4	3	4	5	4	3	3	1	1	2	3	3	4	3	2	4	4	4	4	3	4	3	3	3	3	2	4	3	2	1	1	1	1	4	1	0	1	1	0	0	0	0	0
3	1	1	1	0	17	4	3	3	4	4	4	4	4	4	2	3	2	3	4	3	4	4	4	4	4	4	4	4	4	4	4	4	4	4	2	1	2	2	2	4	1	1	1	1	0	1	1	2	0
6	1	1	2	0	17	5	5	3	1	1	5	5	4	1	2	1	2	1	1	2	2	1	1	3	1	1	1	2	3	2	1	4	4	1	1	1	1	1	1	5	1	0	0	1	0	1	2	0	0
3	1	1	1	0	13	2	4	3	3	3	3	3	1	1	1	1	1	4	5	5	4	5	4	4	4	4	4	3	2	3	2	3	3	4	3	1	1	1	1	5	1	1	1	1	1	0	0	0	0
3	1	1	1	1	18	4	4	4	4	4	4	3	5	4	3	2	2	3	4	3	4	5	3	2	4	4	3	4	2	2	1	4	4	4	3	2	2	1	2	4	1	0	1	1	0	1	1	5	0
5	1	1	1	0	18	2	5	3	3	3	3	3	3	3	3	3	3	3	4	3	3	3	4	4	4	4	4	3	3	3	3	4	4	4	4	1	1	1	1	5	0	1	1	1	0	1		4	1
3	1	1	1	0	17	5	5	5	5	5	5	5						3	4	2	1	4	4	4	4	4	4	4	4	4	4	4	4	4	4	1	1	1	1	2	1	1	0	1	1	1	0	1	0
3	1	1	1	0	17	3	4	3	4	5	3	3	1	1	1	1	1	4	4	3	4	4	4	3	4	4	4	3	3	4	3	4	4	4	3	3	3	3	3	4	1	1	0	0	0	0	1	4	0
7	1	1	1	0	18	3	4	4	5	3	5	5	4	3	3	2	3	3	5	3	4	4	3	1	2	2	4	3	3	3	2	4	4	3	3	2	2	2	2	5	1	1	1	1	1	1	2	4	4
3	1	1	1	0	18	2	1	2	3	3	2	2	2	1	1	2	1	3	4	5	5	5	4	4	4	4	4	4	3	3	1	4	4	3	3	1	1	1	1	4	1	0	0	1	0	1	0	0	0
5	1	2	2	0	18	2	4	3	4	4	3	3	3	2	1	3	3	4	3	3	4	3	4	3	3	3	4	4	4	3	3	4	4	4	3	2	2	2	2	5	1	1	1	0	0	0	2	3	1
5	1	2	1	0	16	3	3	5	5	5	5	5	5	5	5	2	1	5	5	5	5	5	4	2	4	4	2	4	4	1	1	4	4	4	4	1	1	1	1	5	1	1	1	1	1	1	0	0	1
4	1	1	1	0	18	2	2	3	3	3	3	4	4	2	1	2	1	5	5	2	5	5	4	1	3	2	2	4	4	4	4	4	4	4	4	1	1	1	1	5	1	1	1	1	1	0	1	0	0
8	1	1	1	0	18	2	4		4	5	3	3	5	1	1	3	3	5	5	4	4	5	4	4	2	2	4	4	4	4	4	4	4	2	1	4	4	1	1	3	1	0	1	1	0	1	0	2	0
8	1	1	1	0	17	2	4	5	5	5	5	5	5	5	5	3	5	3	4	4	5	5	4	2	4	4	4	4	4	4	4	4	4	4	4	1	1	1	1	4	0	0	0	1	0	0	0	2	4
3	1	1	1	0	18	3	4	5	5	5	3	4	5	4	3	3	3	4	2	2	3	3	3	2	4	4	3	3	3	2	2	4	4	3	3	1	3	3	3	5	1	1	1	1	1	1	1	2	0
5	1	1	1	0	18	3	3	3	3	3	3	3	3	3	3	4	2	4	4	4	4	4	4	4	4	4	4	4	4	4	4	4	4	4	4	1	1	1	1	5	0	1	1	0	0	1	1	5	0
5	1	1	1	0	17	2	5	5	2	2	5	5	5	5	5	5	5	4	4	4	2	2						4	3	3	3	4	4	3	2	3	3	3	3	3	0	0	0	1	0	0	0	0	0
3	1	1	1	1	16	3	2	2	3	4	4	5	3	2	4	1	3	4	4	2	3	4	4	3	3	4	4	4	4	3	3	3	3	3	2	1	1	1	1	5	1	1	0	1	0	1	0	0	0
3	1	1	1	1	16	3	3	4	4	4	3	3	1	2	2	2	2	4	4	2	4	3	3	4	4	3	4	4	3	2	2	3	3	3	2	3	3	3	3	5	1	0	0	0	0	0	0	1	0
3	1	1	1	1	16	1	1	1	1	1	1	1	1	1	1	1	1	5	2	5	3	4		2	4	4	4	3						3	3	1	1	1	1	5	0	0	0	0	0	0	0	0	0
3	1	1	1	1	16	3	3	3	3	3	3	3	4	4	4	4	4	4	5	3	4	3	4	3	4	4	4	3	3	3	3	4	4	4	4	1	1	1	1	5	1	0	1	0	0	0	1	1	0
3	2	2	2	0	13	3	4	5	5	5	3	5	1	1	1	1	1	5	5	4	5	5	3	2	3	2	3	3	2	1	1	4	4		1	1	1	1	1		1	1	1	1	1	1	0	2	0
3	1	1	1	0	16	3	4	3	3	5	4	3	3	1	2	1	1	4	5	4	4	4	4	3	4	4	4	4	4	3	4	4	4	4	3	1	1	1	1	4	1	1	1	1	0	0	0	0	0
3	1	1	1	0	16	4	4	4	4	4	4	4	5	5	1	2	3	2	5	3	4	2	4	2	4	4	3	3	1	2	1	1	3	3	3	1	2	1	2	4	1	1	1	1	1	1	1	0	0
3	1	1	1	1	16	4	3	4	3	2	3	4	2	4	3	2	4	5	3	3	4	3	2	4	3	3	2	3	2	3	3	2	3	1	2	3	3	2	3	3	1	1	0	1	1	0	0	0	0
5	1	1	1	1	16	4	5	3	3	3	5	3	3	3	2	1	3	4	5	4	4	4	4	3	4	3	4	4	3	3	3	3	3	3	3	1	1	1	1	5	1	1	1	1	0	1	1	0	0
4	1	1	1	0	16	4	4	4	4	5	1	3	5	4	2	2	4	4	5	3	4	4	4	3	4	4	4	4	4	4	4	4	4	4	3	1	1	1	1	5	1	1	1	1	0	1	2	0	0
3	1	1	1	0	16	3	3	4	4	4	3	3	5	5	5	5	5	3	4	3	3	3	4	2	3	3	3	3	3	3	3	3	3	3	3	1	1	1	1	5	0	1	0	0	1	0	1		0
3	1	1	1		16	3	5	4	4	3	4	4	5	4	2	4	3	2	4	3	3	4	1	1	3	2	2	3	2	1	2	1	3	4	2	5	3	4	2	5	1	1	1	1	1	1	4	5	0
3	1	1	1	0	16	4	4	4	5	5	3	5	3	3	2	1	1	3	5	4	3	3	3	3	4	4	4	4	2	3	2	4	4	4	3	1	2	1	1	4	1	1	1	1	1	1	1	0	0
3	1	1	1	0	16	2	2	3	5	1	3	3	3	2	1	2	2	2	5	4	3	4	4	4	4	4	4	4	4	4	3	4	4	4	4	1	1	1	1	5	1	0	0	0	0	0	0	0	0
3	1	2	2	1	16	3	3	4	3	3	3	3	1	1	1	1	1	4	4	4	4	3	2	3	1			1	1	3	2	2	2	3	1	1	1	1	1	3	1	1	1	1	1	1	0	0	0
3	1	1	1	0	16	1	5	4	3	5	1	3	3	2	1	3	2	2	4	4	2	3	4	4	3	4	4	4	4	4	4	4	4	4	4	1	1	1	1	4	0	1	0	0	1	0	1	0	0
3	1	1	1	0	16	1	1	1	1	1	2	2	2	1	2	1	1	4	4	4	4	4	4	4	4	4	4	4	4	4	4	4	4	4	4	1	1	1	1	5	1	1	1	1	1	1	0	0	0
3	1	2	1	0	16	3	4	4	5	4	4	3	3	3	1	2	1	4	4	3	4	3	4	4	4	4	4	4	3	3	3			4	3	1	3	1	1	5	1	1	0	1	0	0	0	0	0
3	1	1	1	0	16	2	3	5	3	4	2	4	4	2	4	5	1	4	4	2	3	3	3	2	3	2	2	3	3	4	4	4	4	4	3	1	1	1	1	4	1	0	1	1	0	0	0	0	0
3	1	1	1	0	16	3	4	4	4	3	4	3	4	3	2	1	2	4	4	3	3	3	4	3	4	4	3	4	3	3	3	3	3	3	3	1	1	1	1	5	1	1	0	1	0	0	1	0	0
5	1	9	1	1	17	3	3	3	3	3	3	3	5	2	4	1	1	4	3	3	4	4	4	2	3	3	2	4	4	4	1	1	3	1	1	1	1	1	1	5	1	0	0	0	0	0	0	0	0
3	1	1	1	0	16	2	2	4	4	4	2	3	5	4	2	2	2	4	4	4	3	3	3	2	3	3	3	4	4	4	4	4	4	4	3	1	1	1	1	4	1	1	1	1	0	1	0	0	0
3	1	1	1	0	16	4	4	4	4	4	4	4	2	2	2	1	1	3	4	4	4	4	4	4	4	4	4	3	3	3	3	3	3	3	3	2	1	1	1	5	1	1	1	1	0	0	0	0	0
4	1	1	1	0	16													3	3	3	2	4						2	4	2	1	3	2	1	3	5	3	5	1	5	1	1	1	1	1	1	0	0	0
3	1	2	2	0	16													3	3	3	3	3	3	3	3	3	3	3												3	0	0	0	0	0	0	0		0
3	1	1	1	1	16	4	4	4	4	4	4	4	4	2	3	3	3	1	5	4	2	2	3	3	4	4	3	4	4	4	4	4	3	3	3	2	2	2	2	5	1	1	1	1	1	1	4		4
8	1	1	1	0	16	3	4	5	5	5	5	5	5	3	2	3	4	2	4	1	2	2	3	2	2	2	2	3	2	3	2	4	4	3	3	1	1	1	1	4	0	0	1	1	0	0	0	0	0
3	1	1	1	0	16	3	2	5	5	5	4	5	5	4	2	2	1	4	5	2	5	3	4	3	4	4	4	4	4	4	3	4	4	4	4	1	1	1	1	5	1	1	1	1	0	0	0	0	0
4	1	1	1	0	16	3	4	5	5	5	3	3	5	5	5	3	3	4	4	3	4	3	4	3	3	3	3	3	3	2	2	3	3	3	3	1	1	1	1	4	1	0	1	1	0	0	1	3	1
3	2	2	2	1	16
3	1	1	1	0	16	1	1	1	1	1	1	1	2	2	2	2	2	5	5	3	5	5	4	4	4	4	4	4	4	4	4	4	4	4	4	1	1	1	1	4	1	1	1	1	1	1	0	0	0
3	1	1	1	0	13	3	4	5	5	5	5	5	4	4	2	3	4	5	5	4	3	3	3	2	3	3	3	4	4	3	3	3	3	3	3	1	1	1	1	4	1	1	1	1	1	1	2	0	0
3	1	1	1	0	16	3	2	3	3	3	3	3	3	3	1	1	1	4	4	4	4	4	4	4	4	4	4	3	1	1	1	3	3	3	3	1	1	1	1	5	1	1	1	1	1	1	1	0	0
3	1	1	1	1	16	1	1	1	1	1	1	1	3	2	2	2	2	5	5	5	4	4	4	4	4	4	4	4	4	3	4	4	4	4	4	1	1	1	1	4	1	0	0	1	0	0	0	0	0
5	1	1	1		17	3	3	3	3	3	3	3						3	3	3	3	3	3	3	3	3	3														0	0	0	1	0	0	1	0	0
3	1	1	1	1	16	1	4	4	4	5	5	5	3	2	1	1	2	4	5	4	5	5	4	4	4	4	4	4	1	1	3	4	4	4	4	1	1	1	1	5	1	1	1	1	0	0	1	2	0
3	1	1	1	0	16	4	2	3	3	3	3	4	4	4	2	3	3	4	5	4	5	5	4	4	4	4	4	4	3	3	3	4	4	4	4	1	1	1	1	5	1	1	1	1	0	0	0	0	0
3	2	2	2	1	16	4	5	4	3	3	4	5	3	2	1	2	3	4	3	2	3	4	2	3	4		4	4	3	4	3	4	3	4	3	4	3	4	5	2	0		0	1	0	1	4	1
3	1	1	1	0	18			5	5	5	1		5	5	5					5	4	5	3					4		3		4	4			1	1	1	1	5	1	1		0	0	0	0	0	0
5	1	1	2	0	18	5	3	5	5	5	5	4	5	5	3	2	3	3	4	2	4	3	4	1	4	3	2	4	4	4	4	4	4	4	4	1	1	1	1	5	1	1	0	0	0	1	1	0
4	1	9	1	0	17	2	2	4	4	5	4	4	3	1	1	1	2	3	3	4	4	3	3	3	2	3	2	4	2	3	2	4	4	3	2	1	1	1	1	5	1	0	0	1	0	0	0	0	0
3	1	1	1	0	18	3	4	5	4	5	4	4	3	3	2	1	1	4	4	4	5	5	4	3	3	4	4	4	3	3	3	4	4	4	4	1	1	1	1	5	1	1	1	1	1	0	1	3	0
3	1	1	1	0	18	2	3	3	5	4	4	5	4	3	3	3	3	5	3	2	5	4	4	3	3	2	2	3	3	2	3	2	3	2	1	2	2	2	2	4	1	1	1	1	0	1	1	1	0
5	1	2	2	0	17	5	5	5	5	5	5	5	4	5	5	1	5	4	4	2	4	4	4	4	4	4	4	4	4	4	4	4	4	4	4	1	1	1	1	5	1	1	1	1	1	1	4	4	0
3	1	2	2	0	18	4	4	5	5	5	5	4	5	4	5	3	1	4	3	3	4	3	4	2	1	3	2	4	3	3	3	3	4	3	2	2	2	2	2	5	1	1	1	1	0	1	1	0	0
3	1	2	2	0	17	4	4	5	5	5	3	2	5	4	4	2	3	5	5	3	3	3	4	4	3	3	4	4	4	4	4	4	4	4	3	2	2	1	1	4	1	1	1	1	1	1	2	3	1
3	2	2	2	0	17	1	1	5	5	5	1		5	1	3	1	1		3	3		4				4			3	3	3	3	3	3		1	1	1	1	3	1	1	0	0	0	0	0	0	0
4	1	1	1	0	16	4	3	5	4	5	4	3	3	2	2	1	3	4	5	2	5	4	4	4	4	4	4	4	4	1	2	1	3	3	3		3	4	1	4	0	0	1	1	0	1	1	5	4
3	2	2	2	1	17	5	5	5	5	5	5	5	1	1	1	1	1	5	5	5	3	5	3	4	4	4	4									1	1	1	1	1							0	0	0
4	1	1	1	1	17	1	1	3	2	4	4	3	3	1	1	1	1	4	4	5	5	5	4	3	4	4	4	4	3	3	3	4	4	3	2	1	1	1	1	4	1	1	0	1	0	0	0	0	0
3	1	1	1	0	18		5	4	3	5	4	3	3					4	3		5	3	2	1	3	2	1		4	3	4	4	4	4	4	1	1	1	1	3	1	1	0	0	0	0		0	0
3	2	2	2	1	16	3	4	3	2	2	4	4	4	2	3	2	1	4	4	3	4	4	3	3	4	4	3	3	3	3	3	3	3	4	2	1	1	1	1	4	0	1	1	1	0	1	0	0	0
3	1	1	1	1	17		4	5	5	5	4	5	5	5	5	2	5	4	5	4	3	3	3	1	4	4	4	3	3	3	2	2	3	2	2	1	1	1	1	4	1	1	1	0	0	0	4		0
3	1	2	2	0	16	3	3	3	2	2	3	3	4	1	2	1	1	3		3	3	3	2	2	3	3	3	3	2	2	2	3	4	1	3	1	1	1	1	4	1	1	1	1	1	0	0	0	0
3	1	2	2	0	16	1	5	4	5	5	2	5	2	1	1	1	1	4	3	4	4	2	4	2	2	3	4	3	3	1	1	2	4	3	2	1	1	1	1	2	1	1	0	0	1	0	0	0	0
5	1	1	1	0	16	5	3	5	5	5	5	5	5	5	5	5	5	5	5	5	3	5	1	1	1	1	1	4	4	4	4			4		1	1	1	1	5	1	1	1	1	0	1	0	0	0
3	1	2	2	1	16	2	4	5	5	5	3	5	3	1	1	2	1	4	4	3		3	4	3	4	4	3	4	4	4	4	4	4	2	1	1	1	1	1	5	1	1	0	1	1	0	0	0	0
3	1	1	1	1	16	4	5	5	5	5	4	5	2	4	2	3	2	3	4	1	4	3	4	1	3	2	2	4	4	3	4	4	4	4	2	1	1	1	1	4	1	0	0	1	1	1	0	0	0
3	1	2	2	1	16	2	2	4	4	4	3	3	2	1	1	2	2	4		4	4	3	4	4	4	4	4	3			2	3	4	3	2	1	1	1	1	4	1	0	1	1	0	0	0	0	0
3	1	2	2		17	4	4		5	5	5	5	4	2	4	2	2	4			2	1	4	2		3	4	4	4	4	2	4	4	3	3	1	1	1	3	4	1	1	0	1	0	0	0	0	0
4	1	2	1	0	16	3	1	5	5	5	3	2	4	4	2	4	3	4	5	3	3	3	3	2	1	3	2	4	3	3	4	4	4	4	3	1	1	1	1	5	1	1	1	1	0	1	2	2	1
3	1	2	2	1	16	3	4	5	5	5	5	5	1	1	2	1	2	4	3	1	3	3	4		4	4	4	4	4	3	3	4	4	1	1	1	1	1	1	4	0	0	1	1	0	0	0	0	0
3	1	2	2	0	16	2	4	5	5	5	5	5	4	3	3	3	3	4	4	3	3	2	3	2	3	3	3	3	3	2	2	4	4	3	3	1	1	1	1	2	0	0	1	1	0	1	0	0	0
3	1	1	1	0	16	2	3	4	3	4		5	4	2	2	2	2	4	3	3	3	3	3	2	4	3	3	4	3	4	3	4	4	4	3	1	1	1	1	3	0	0	0	0	0	0	0	0	0
3	1	1	1	0	16	3	4	5	5	5	5	5	5	4	1	1	3	3	2	2	4	1	3	3	3	3	3	4	4	4	4	4	4	4	3	1	1	1	1	1	0	1	0	0	0	0	1	0	0
4	1	1	2	0	16	3	3	4	4	5	3	4	3	2	1	2	1	5	5	3	4	3	3	4	4	4	4	4	4	4	4	4	4	4	4	1	1	1	1	4	1	1	1	1	0	0	0		0
3	1	2	2	1	16	3	4	4	5	5	3	4	4	4	2	1	2	4	5	2	3	3	3	2	2	3	3	4	2	3	3	4	4	3	2	1	1	1	1	4	1	1	0	1	0	0	0	0	0
3	1	1	1	1	16	1	3	3	4	4	1	3	3	1	1	1	3	4	5	1	4	5	1	1	1	1	1	4	3	3	1	3	4	4	4	1	1	1	1	5	1	1	0	0	0	0	0	0	0
3	1	1	1	1	16	1	4	3	3	1	5	5	2	4	4	1	1	4	5	4	4	5	4	2	4	4	4	4	3	2	4	4	4	4	3	1	1	1	1	4	1	1	1	1	0	0	0	0	0
3	1	1	1	0	16	1	2	3	2	2	2	3	1	1	1	1	1	5	5	4	5	4	4	4	4	4	4	4	3	4	2	4	4	4	4	1	1	1	1	5	0	1	0	0	0	0	1	0	0
3	1	1	1	1	16	1	1	3	3	2	1	2	2	1	1	1	1	5	5	5	5	5	4	4	4	4	4	4	3	3	3	4	4	4	4	1	1	1	1	5	1	1	0	1	0	0	0	0	0
5	1	1	1		16	3	5	5	5	5	4	5	5	5	5	1	3	3	2	3	3	2	2	1	2	3	2	4	2	3	2	4	4	3	1	1	1	1	1	5	0	1	1	1	0	0	0	0	0
3	1	1	1	0	16	3	3	4	4	4	3	4	3	4	4	2	2	4	5	3	4	2	4	3	3	3	4	4	4	4	4	4	4	4	4	4	4	1	1	4	1	1	1	1	1	1	1	0	0
3	1	1	1	1	16	3							1	1	1	1	2	3	5	3	1	5	4	3	2	4	4	4	4	4	4	4	4	4	4	1	1	1	1	4	0	1	1	1	0	1	1	0	0
3	2	2	2	0	16	4	1	4	4	4	2	4	4	4	4	4	3	4	4	3	3	3	4	4	3	4	4	4	4	4	4	4	4	4	4	1	1	1	1	5	0	1	0	1	0	0	0	0	0
5	1	1	1	0	16	3	4	5	4	4	3	3	4	4	1	4	1	4	5	4	4	4	4	4	4	4	4	4	4	4	3	3	3	4	3	1	1	1	1	5	0	1	0	1	0	1	1	0	0
3	1	1	1	1	16	2	2	3	3	4	5	5	1	1	1	1	1	4	5	5	1	2	4	3	4	3	3	4	4	4	4	4	4	4	3	1	1	1	1	4	1	1	1	1	0	0	0	0	0
3	1	1	1	1	16	3	3	4	2	3	4	4	3	2	2	2	2	2	4	3	3	3	3	3	4	3	3	3	3	3	3	3	3	3	3	1	1	1	1	4	0	1	0	1	1	1		0	0
3	1	1	1	0	16	2	4	3	4	3	3	3	3	1	1	1	1	4	5	3	4	3	4	4	4	4	4	4	3	3	3	4	4	4	4	1	1	1	1	2	0	1	0	1	0	1	0	0	0
3	1	1	1	1	16																																										0	0	0
1	1	1	1	1	16													4	5	5																				2	0	0	0	0	0	1	0	0	0
3	1	1	1	0	16													3	4	2	2	1	4	4	4	4	4	4	4	4	4	4	4	4	4												2	0	0
3	1	1	1	1	16	3	2	5	3	5	3	5	5	5	5	5	5	4	5	2	5	3	4	4	4	4	4	4	4	4	3	4	4	4	4	1	3	1	1	5	1	1	0	0	0	1	3	0	0
3	1	2	2	1	16	2	5	5	5	5	3	2	2	2	2	1	1	4	3	3	4	5	4	4	4	4	4	4	4	4	4	4	4	4	4	2	2	2	2	5	1	1	1	1	1	1	0	0	0
1	9	9	9	1	16																																										0	0	0
1	1	1	2	1	13	4	4	5	4	5	4	4	2	3	2	3	2	4	4	4	5	5	3	3	4	2	3	2	3	2	3	2	3	2	3	4	4	4	4									0

## Sheet: Sheet2
I live with my mother and my mother [1]
I live with my mother, but not with my father [2]
I live with my father, but not with my mother [3]
I live with my mother and her partner [4]
I live with my father and his partner [5]
I live with my grandparents (or grandfather alone, or grandmother alone) [6]
I live with friends [7]
I live alone [8]
I live in other situations (foster family, children's home, etc.)
[9] N.C. (Not classified) [99]
I was born, my father was born and my mother was born: [1] Spain, [2] Abroad, [9] NA.
In the case of Q3, Q5 and Q8 (1) Completely disagree (2) Mostly disagree (3) Neither agree nor disagree (4) Mostly agree and (5) Completely agree.
In the case of Q4, (1) almost never; (2) rarely; (3) sometimes; (4) often; (5) almost always.
In the case of Q6: (1) very difficult, (2) difficult, (3) easy; (4) very easy.
In the case of Q7, (1) Does not apply at all to me; (2) Does not apply well to me; (3) Applies quite well to me; (4) Applies very well to me.
